# Supplementary material
Source: publisher figshare collection journal article supplement (https://acs.figshare.com/ndownloader/files/7276007)
Supplement: Supplementary file 1 [file 7276007]

## Supporting Information

### Indole Synthesis via Cyclative Formation of 2,3-Dizincindoles and Regioselective Electrophilic Trapping

Laurean Ilies,\* Mayuko Isomura, Shin-ichi Yamauchi, Tomoya Nakamura, and Eiichi Nakamura\*

Department of Chemistry and Molecular Technology Innovation Chair, The University of Tokyo,  
7-3-1 Hongo, Bunkyo-ku, Tokyo 113-0033

laur@chem.s.u-tokyo.ac.jp, nakamura@chem.s.u-tokyo.ac.jp

#### Table of Contents

|                                                                                   |             |
|-----------------------------------------------------------------------------------|-------------|
| <b>1. General Information .....</b>                                               | <b>S-2</b>  |
| <b>2. Instrumentation .....</b>                                                   | <b>S-2</b>  |
| <b>3. Materials .....</b>                                                         | <b>S-3</b>  |
| <b>4. Preparation of Starting Material.....</b>                                   | <b>S-4</b>  |
| <b>5. Typical Procedure for the Cyclization Reaction .....</b>                    | <b>S-7</b>  |
| <b>6. Reaction of Dimetalloindole with Various Electrophiles .....</b>            | <b>S-9</b>  |
| <b>7. One Pot Synthesis of Indenoindolone.....</b>                                | <b>S-22</b> |
| <b>8. Synthesis of Benzodipyrrole .....</b>                                       | <b>S-23</b> |
| <b>9. Cyclization with One Equivalent of Phenylzinc Bromide .....</b>             | <b>S-24</b> |
| <b>10. Reactivity of Dimetallic Intermediates.....</b>                            | <b>S-25</b> |
| <b>11. Reaction of Intermediate B<sup>2</sup> with Electrophiles .....</b>        | <b>S-25</b> |
| <b>12. <sup>1</sup>H, <sup>2</sup>D, <sup>13</sup>C NMR and NOE Spectra .....</b> | <b>S-31</b> |
| <b>13. DFT Calculations .....</b>                                                 | <b>S-87</b> |
| <b>14. References .....</b>                                                       | <b>S-89</b> |

## 1. General Information

All reactions dealing with air- or moisture-sensitive compounds were conducted in a dry reaction vessel under an atmosphere of nitrogen. Air- and moisture-sensitive liquids and solutions were transferred *via* syringe or Teflon cannula. Analytical thin-layer chromatography was performed on glass plates coated with 0.25 mm 230–400 mesh silica gel containing a fluorescent indicator (Merck). Thin layer chromatography plates were visualized by exposure to ultraviolet light (UV) and/or iodine. Organic solutions were concentrated by rotary evaporation at *ca.* 40 Torr (evacuated with a diaphragm pump). Flash column chromatography was performed as described by Still et al.,<sup>1</sup> employing Kanto Silica gel 60 N (spherical, neutral, 40–50  $\mu\text{m}$ ).

## 2. Instrumentation

The water content of the solvent was confirmed with a Karl-Fischer Moisture Titrator (CA-21, Mitsubishi Chemical Analytech Company) to be less than 20 ppm. Proton nuclear magnetic resonance ( $^1\text{H}$  NMR) was recorded with JEOL ECX-400 (400 MHz) NMR, JEOL ECA-500 (500 MHz), JEOL ECZ-500 (500 MHz), and Bruker US500 (500 MHz) spectrometer. Chemical data for protons are reported in parts per million (ppm,  $\delta$  scale) downfield from tetramethylsilane (0.0 ppm) and are referenced to residual proton in the NMR solvent ( $\text{CDCl}_3$ :  $\delta$  7.26,  $\text{THF-}d_8$ :  $\delta$  3.58). Carbon nuclear magnetic resonance ( $^{13}\text{C}$  NMR) was recorded at 125 MHz: chemical data for carbons are referenced to the carbon resonance of the solvent ( $\text{CDCl}_3$ :  $\delta$  77.0). NOE experiments were conducted using the Delta noe\_1d\_dpfgse pulse sequence and detailed experimental parameters are listed at the spectroscopic data section for each compound. The data are presented as follows: chemical shift, multiplicity (s = singlet, d = doublet, t = triplet, q = quartet, quint = quintet, sext = sextet, m = multiplet and/or multiplet resonances, br = broad), coupling constant in Hertz (Hz), and integration. Gas chromatographic (GC) analyses were performed on Shimadzu GC-2025 instruments equipped with an FID detector and a capillary column, HR-1 (25 m  $\times$  0.25 mm i.d., 0.25  $\mu\text{m}$  film). Gel permeation column chromatography was performed on a Japan Analytical Industry LC-92XX II NEXT SERIES (eluent: chloroform) with 1HH and 2HH polystyrene column, and Japan Analytical Industry LC-908 (eluent: toluene) with JAIGEL 1H and 2H polystyrene columns. Mass spectra were acquired by Shimadzu Parvum 2 gas chromatograph mass spectrometer (GC-MS) or by atmospheric

pressure ionization (APCI) using a time-of-flight mass analyzer on Bruker micrOTF II with a calibration standard of polyethylene glycol (MW 600), JEOL JMS-700P (FAB) with a calibration standard of polyethylene glycol (MW 600), and JEOL JMS-T100LC (AccuTOF) spectrometer with a calibration standard of polyethylene glycol (MW 400) or Reserpine (MW 609). Melting points were determined by METTER TOLEDO MP70 Melting Point System or MEL-TEMP II.

### 3. Materials

Unless otherwise noted, materials were purchased from Tokyo Kasei Co., Aldrich Inc., KANTO Chemical Co., Inc., or WAKO Pure Chemical and used after appropriate purification before use. Anhydrous ether, THF, and toluene (stabilizer-free) were purchased from WAKO Pure Chemical and purified by a solvent purification system (Glass Contour)<sup>2</sup> equipped with columns of activated alumina and supported copper catalyst (Q-5) prior to use. Butyllithium was purchased from KANTO Chemical Co., Inc., passed over a pad of Celite under nitrogen and the concentration was determined by titration with menthol in the presence of 2,2'-bipyridyl. Organozinc reagents were purchased from Aldrich Inc., and concentration was determined by titration with methylorange. A solution of  $\text{CuCN} \cdot 2\text{LiCl}$  in THF (1.0 mol/L) was prepared by mixing CuCN (0.62 g, 7.0 mmol) and LiCl (0.59 g, 14.0 mmol), drying under vacuo at 160 °C for 3.5 h in a Schlenk-flask, then adding 80 mL of dry THF and stirring until all salts were dissolved. A solution of  $\text{ZnCl}_2$  in THF (1 mol/L) was prepared by melting pure  $\text{ZnCl}_2$  (beads, 99.99%) with a heat gun, then adding dry THF and stirring until all  $\text{ZnCl}_2$  were dissolved.

#### 4. Preparation of Starting Materials

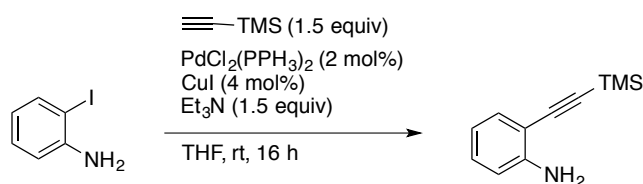

**2-((Trimethylsilyl)ethynyl)aniline** : In a 200 mL oven-dried two-necked round bottom flask, 2-iodoaniline (5.2 g, 23.9 mmol) was dissolved in THF (30 mL), and triethylamine (16.0 mL, 34.2 mmol) was added. Trimethylsilylacetylene (5.1 mL, 36.0 mmol),  $\text{PdCl}_2(\text{PPh}_3)_2$  (337 mg, 0.48 mmol, 2 mol%), and  $\text{CuI}$  (183 mg, 0.96 mmol, 4 mol%) were added to this solution and the reaction mixture was stirred for 16 h at room temperature. Volatiles were removed by rotary evaporation (evacuated with a diaphragm pump) to obtain a brown residue (6.11 g). The residue was dissolved in EtOAc (30 mL) and filtrated. After the concentration of the filtrate *in vacuo*, purification by silica gel column chromatography (150 g, eluent: 20% ethyl acetate, 1% triethylamine/hexane) afforded the title compound (4.28 g, 94%) as a brown oil. The compound data was in agreement with the literature.<sup>3</sup>  $^1\text{H}$  NMR (400 MHz,  $\text{CDCl}_3$ ):  $\delta$  0.26 (s, 9H), 4.22 (br, 2H), 6.64–6.69 (m, 2H), 7.11 (t, 1H), 7.30 (d,  $J = 7.6$  Hz, 1H). (400 MHz,  $\text{CDCl}_3$ ):  $\delta$  0.27 (s, 9H), 4.23 (br, 2H), 6.64–6.69 (m, 2H), 7.11 (t, 1H), 7.28 (d,  $J = 7.6$  Hz, 1H); HRMS (APCI+) Calcd. for  $\text{C}_{11}\text{H}_{15}\text{NSi}$  (M): 189.0968; Found: 189.0964.

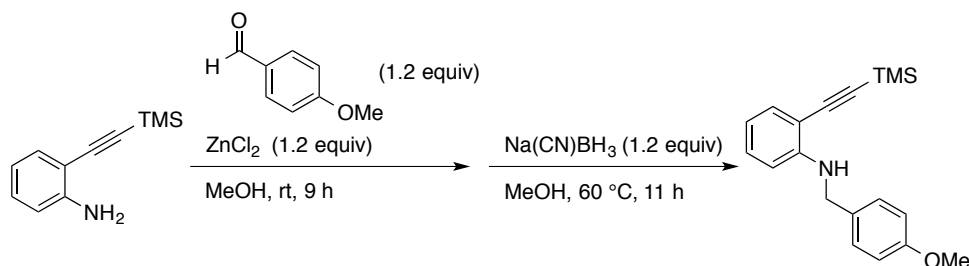

**2-((Trimethylsilyl)ethynyl)-N-(4-methoxybenzyl)aniline** : In a 300 mL oven-dried two-necked round bottom flask 2-((trimethylsilyl)ethynyl)aniline (4.02 g, 22.4 mmol) was dissolved in methanol (42.0 mL). A solution of anhydrous  $\text{ZnCl}_2$  (3.68 g, 26.8 mmol) in methanol (30.0 mL), and *p*-anisaldehyde (3.26 mL, 26.8 mmol) were added. After stirring for 9 h, sodium cyanoborohydride

(1.78 g, 26.8 mmol) was added at 0 °C. After refluxing for 11 h at 70 °C, the reaction mixture was cooled to room temperature and methanol was removed *in vacuo* (evacuated with a diaphragm pump). The organic layer was extracted twice with Et<sub>2</sub>O and then three times with CH<sub>2</sub>Cl<sub>2</sub> and the combined organic extracts were washed with water. Drying over MgSO<sub>4</sub> and concentration *in vacuo* afforded a brown oily product (7.50 g). The crude material was purified by silica gel column chromatography (225 g, eluent: 5% ethyl acetate, 1% triethylamine/hexane) to give the title compound (4.60 g, 70%) as a yellow oil. The compound data was in agreement with the literature.<sup>4</sup> <sup>1</sup>H NMR (400 MHz, CDCl<sub>3</sub>): δ 0.21 (s, 9H), 3.81 (s, 3H), 4.33 (d, *J* = 5.3 Hz, 2H), 4.98 (br, 1H), 6.56 (d, *J* = 8.2 Hz, 1H), 6.60 (t, *J* = 7.7 Hz, 1H), 6.88 (d, *J* = 8.5 Hz, 2H), 7.15 (t, *J* = 7.6 Hz, 1H), 7.28–7.31 (m, 3H); HRMS (APCI+) Calcd. for C<sub>19</sub>H<sub>23</sub>NOSi (M): 309.1543; Found: 309.1550.

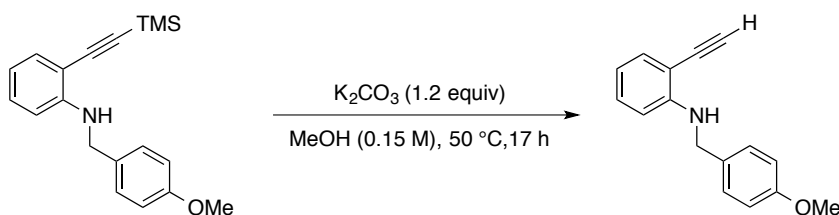

**2-Ethynyl-*N*-(4-methoxybenzyl)aniline (1):** In a 200 mL oven-dried two-necked round bottom flask *N*-(4-methoxybenzyl)-2-((trimethylsilyl)ethynyl)aniline (4.60 g, 14.9 mmol) was dissolved in methanol (100 mL). K<sub>2</sub>CO<sub>3</sub> (2.48 g, 17.8 mmol) was added to this solution. The yellow solution was warmed to 50 °C and stirred for 17 h. Methanol was removed *in vacuo* (evacuated with a diaphragm pump) and the reaction mixture was quenched with aqueous NaOH (10 %). The organic layer was extracted four times with Et<sub>2</sub>O (50 mL). Drying over MgSO<sub>4</sub> and concentration *in vacuo* afforded a sticky yellow solid (3.10 g). The crude material was purified by silica gel column chromatography (90 g, eluent: 13% ethyl acetate, 1% triethylamine/hexane) to obtain the title compound (2.27 g, 64%) as a white yellow solid. The compound data was in agreement with the literature.<sup>3</sup> <sup>1</sup>H NMR (400 MHz, CDCl<sub>3</sub>): δ 3.37 (s, 1H), 3.78 (s, 3H), 4.31 (d, *J* = 5.5 Hz, 2H), 4.99 (br, 1H), 6.56–6.62 (m, 2H), 6.88 (d, *J* = 8.5 Hz, 2H), 7.16–7.35 (m, 4H); Melting Point: 86–87 °C; HRMS (APCI+) Calcd. for C<sub>16</sub>H<sub>15</sub>NO (M): 237.1148; Found: 237.1140.

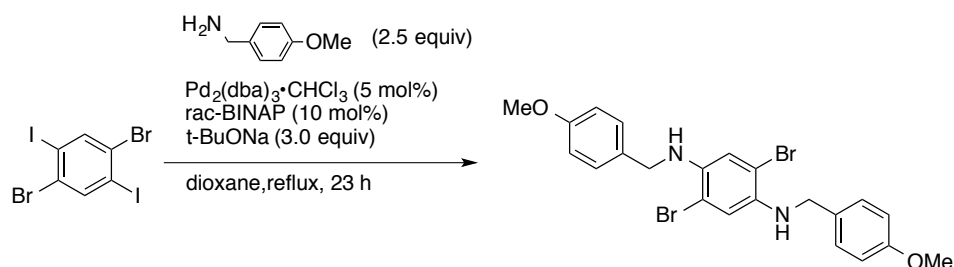

**2,5-Dibromo-*N*<sup>1</sup>,*N*<sup>4</sup>-bis(4-methoxybenzyl)benzene-1,4-diamine:** In a 300 mL oven-dried two-necked round bottom flask, 1,4-dibromo-2,5-diiodobenzene (24.38 g, 50.0 mmol) was dissolved in dioxane (110 mL). To this mixture, 4-(methoxyphenyl)methanamine (16.0 mL, 121 mmol), tBuONa (14.4 g, 150 mmol), *rac*-BINAP (3.11 g, 5.0 mmol), and Pd<sub>2</sub>(dba)<sub>3</sub>•CHCl<sub>3</sub> (2.61 g, 2.5 mmol) were added. The solution was heated to 110 °C and stirred for 23 h. The reaction mixture was quenched with H<sub>2</sub>O and the organic layer was extracted four times with dichloromethane (50 mL). After drying over MgSO<sub>4</sub>, the extract was filtrated through celite and washed with DCM. Concentration *in vacuo* afforded a dark brown oil (34.43 g). The crude material was purified by silica gel column chromatography (eluent: DCM/hexane = 3/1, 1% triethylamine) to obtain the mixture (21.19 g). The mixture was used without further purification for the next reaction. <sup>1</sup>H NMR (500 MHz, CDCl<sub>3</sub>): δ 3.80 (s, 6H), 4.11 (br, 2H), 4.22 (br, 4H), 6.83 (s, 2H), 6.88-6.90 (m, 4H), 7.28 (s, 4H).

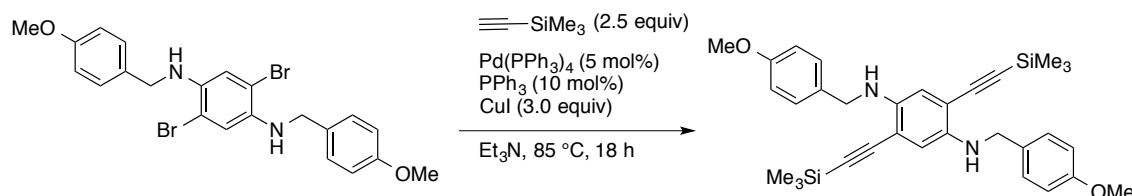

***N*<sup>1</sup>,*N*<sup>4</sup>-bis(4-Methoxybenzyl)-2,5-bis((trimethylsilyl)ethynyl)benzene-1,4-diamine:** In a 100 mL oven-dried two-necked round bottom flask, 2-iodoaniline (2.25 g, 4.44 mmol) was dissolved in triethylamine (40 mL) was added. Trimethylsilylacetylene (1.58 mL, 11.18 mmol), Pd(PPh<sub>3</sub>)<sub>2</sub> (103.6 mg, 0.09 mmol, 2 mol%), PPh<sub>3</sub> (46.5 mg, 0.18 mmol) and CuI (33.2 mg, 0.17 mmol) were added to this solution and the reaction mixture was stirred for 18 h at 85°C. Volatiles were removed by rotary evaporation (evacuated with a diaphragm pump), and dissolved in MeOH. The solution was filtrated to obtain a brown filtrate (2.137 g). After the concentration of the filtrate *in vacuo*, purification by silica gel column chromatography (eluent: DCM/hexane = 2/1, 1% triethylamine) afforded the title compound, containing a small amount of byproduct (1.99 g, 83%). The mixture was used without

further purification for the next reaction.  $^1\text{H}$  NMR (500 MHz,  $\text{CDCl}_3$ ):  $\delta$  0.25 (s, 18H), 3.26 (s, 2H), 4.68 (br, 2H), 6.71-6.74 (d,  $J$  = 8.8 Hz, 4H), 6.96 (s, 2H), 7.09 (d,  $J$  = 8.8 Hz, 4H).

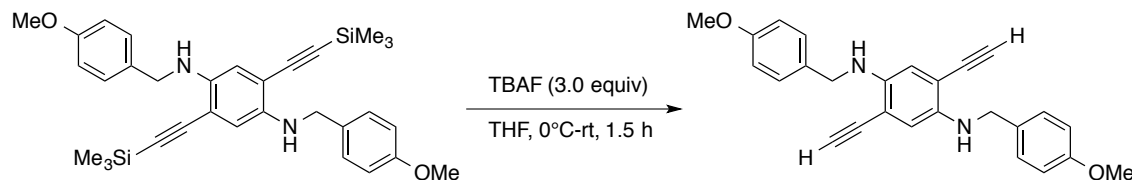

**2,5-Diethynyl- $N^1,N^4$ -bis(4-methoxybenzyl)benzene-1,4-diamine (3):** In a 200 mL oven-dried two-necked round bottom flask  $N^1,N^4$ -bis(4-methoxybenzyl)-2,5-bis(trimethylsilyl)ethynylbenzene-1,4-diamine (1.83 g, 3.38 mmol) was dissolved in THF (40 mL). TBAF (1.0 M, 8.5 mL, 8.5 mmol) was added to this solution at 0 °C. The yellow brown solution was warmed to room temperature and stirred for 1.5 h. THF was removed *in vacuo* (evacuated with a diaphragm pump). The organic layer was extracted four times with DCM. Drying over  $\text{MgSO}_4$  and concentration *in vacuo* afforded a yellow solid (1.30 g). The crude material was purified by silica gel column chromatography (eluent: DCM, 1% triethylamine) to obtain the title compound (1.50 g, 97%) as a yellow solid.  $^1\text{H}$  NMR (400 MHz,  $\text{CDCl}_3$ ):  $\delta$  3.40 (s, 2H), 3.80 (s, 6H), 4.25 (s, 4H), 4.48 (br, 1H), 6.68 (s, 2H), 6.87 (d,  $J$  = 8.7 Hz, 4H), 7.28 (d,  $J$  = 8.7 Hz, 4H).  $^{13}\text{C}$  NMR (100MHz,  $\text{CDCl}_3$ ):  $\delta$  48.0, 55.2, 80.8, 83.9, 109.0, 114.0, 114.5, 128.6, 131.1, 141.3, 158.8; Melting Point: 173-174 °C; HRMS (APCI+) Calcd. for  $\text{C}_{26}\text{H}_{24}\text{N}_2\text{O}_2$  (M): 396.1832; Found: 396.1839.

## 5. Typical Procedure for the Cyclization Reaction

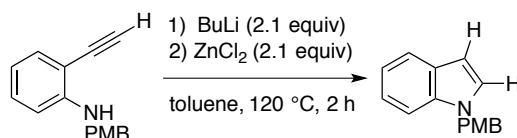

**$N$ -(4-methoxybenzyl)indole :** In an oven-dried Schlenk tube, 2-ethynyl- $N$ -(4-methoxybenzyl)aniline **1** (95 mg, 0.40 mmol) was dissolved in  $\text{Et}_2\text{O}$  (0.8 mL), and BuLi in hexane (1.59 mol/L, 0.52 mL, 0.82 mmol) was added at 0 °C. A solution of  $\text{ZnCl}_2$  in THF (1.0 mol/L, 0.82mL, 0.82 mmol) was added dropwise at room temperature. Volatiles were removed *in vacuo*, and then toluene (0.8 mL) was added. The resulting mixture was stirred at 120 °C for 2 h, to afford a yellow suspension. The reaction was quenched with aq.  $\text{NH}_4\text{Cl}$ . The reaction mixture was extracted with ethyl acetate (3×5

mL), and the solvent was removed in *vacuo*, to afford a dark yellow oily product (136 mg). The product was passed by over a pad of silica gel to give the title compound (114 mg, 96%) as a yellow oil. The compound data was in agreement with the literature.<sup>3</sup> <sup>1</sup>H NMR (400 MHz, CDCl<sub>3</sub>): δ 3.77 (s, 3H), 5.26 (s, 2H), 6.53 (d, *J* = 3.0 Hz, 1H), 6.82 (d, *J* = 8.5 Hz, 2H), 7.16 (t, *J* = 8.0 Hz, 1H), 7.29 (d, *J* = 8.0 Hz, 1H), 7.30 (d, *J* = 10 Hz, 1H). <sup>1</sup>H NMR (500 MHz, THF-*d*<sub>8</sub>): δ 3.70 (s, 3H), 5.28 (s, 2H), 6.41 (d, *J* = 5.0 Hz, 1H), 6.78-6.81 (m, 2H), 6.95 (t, *J* = 5.0 Hz, 1H), 7.02 (t, *J* = 5.0 Hz, 1H), 7.06-7.08 (m, 2H), 7.18-7.19 (m, 1H), 7.30 (d, *J* = 5.0 Hz, 1H), 7.50 (d, *J* = 5.0 Hz, 1H). <sup>13</sup>C NMR (100MHz, CDCl<sub>3</sub>): δ 49.5, 55.2, 101.8, 109.7, 114.1 (2C), 119.4, 120.9, 121.6, 128.0, 128.2 (2C), 128.7, 129.5, 136.2, 159.0; HRMS (APCI+) Calcd. for C<sub>16</sub>H<sub>15</sub>NO (M): 237.1148; Found: 237.1158.

**2,3-*d*<sub>2</sub>-*N*-(4-methoxybenzyl)indole (2a) :** Using the same procedure, following by quenching with D<sub>2</sub>O instead of water, produced 2,3-dideuterioindole. The degree of deuterium incorporation was determined by NMR (solvent THF-*d*<sub>8</sub>) by comparison with the spectrum of *N*-(4-methoxybenzyl)indole **2a'**. <sup>2</sup>D NMR (77 MHz, CHCl<sub>3</sub>) δ 6.60, 7.17.

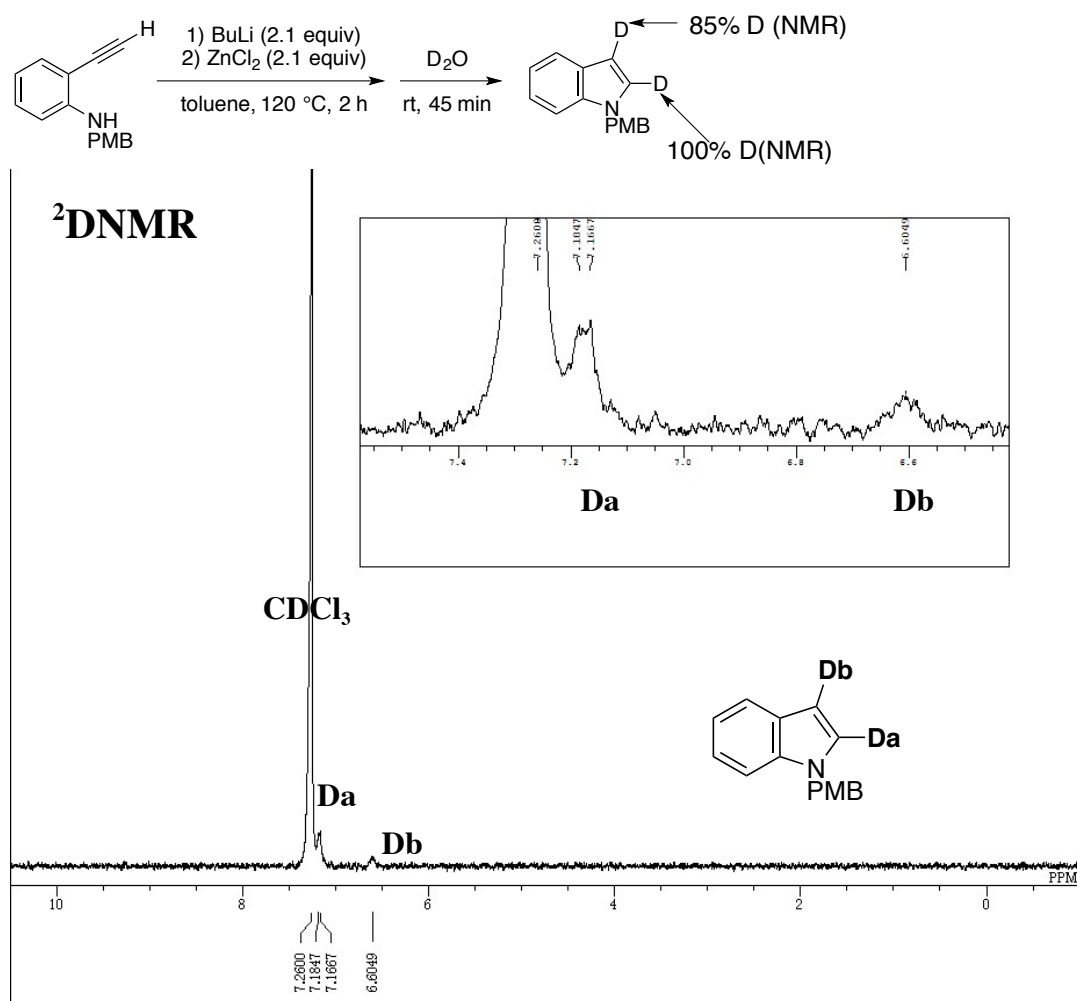



## 6. Reaction of Dimetalloindole with Various Electrophiles

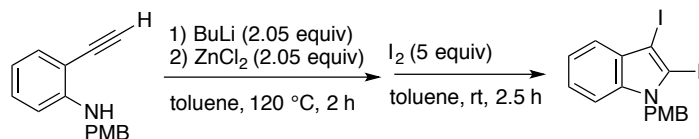

**2,3-Diiodo-1-(4-methoxybenzyl)indole (Table 1, entry 1):** In an oven-dried Schlenk tube, 2-ethynyl-*N*-(4-methoxybenzyl)aniline **1** (95 mg, 0.40 mmol) was dissolved in Et<sub>2</sub>O (0.8 mL), and BuLi in hexane (1.59 mol/L, 0.52 mL, 0.82 mmol) was added at 0 °C. A solution of ZnCl<sub>2</sub> in THF (1.0 mol/L, 0.82 mL, 0.82 mmol) was added dropwise at room temperature. Volatiles were removed in *vacuo*, and then toluene (0.8 mL) was added. The resulting mixture was stirred at 120 °C for 2 h, to give a yellow suspension. After cooling the reaction mixture at 0 °C, a solution of iodine (508 mg, 2.0 mmol) in toluene (2 mL) was added. The reaction mixture was stirred at room temperature for 2.5 h, and was quenched with aq. Na<sub>2</sub>S<sub>2</sub>O<sub>3</sub>. The reaction mixture was extracted with ethyl acetate (3×5 mL), and the solvent was removed in *vacuo*, to afford a brown oily product (224 mg). The product was purified by silica gel column chromatography (eluent: 2% ethyl acetate in hexane) to give the title compound (145 mg, 74%) as a white solid. Monoiodoindole formed in 7% (NMR). Melting Point: 85-86 °C; <sup>1</sup>H NMR (500 MHz, CDCl<sub>3</sub>): δ 3.76 (s, 3H), 5.47 (s, 2H), 6.81 (d, *J* = 8.5 Hz, 2H), 7.01 (d, *J* = 8.5 Hz, 2H), 7.11-7.16 (m, 2H), 7.22-7.25 (m, 1H), 7.42-7.44 (m, 1H); <sup>13</sup>C NMR (125 MHz): 52.0, 55.2, 95.9, 110.4, 114.1 (2C), 121.0, 121.4, 123.1, 127.7 (2C), 128.6, 131.9, 137.7, 159.1; Anal. Calcd. for C<sub>16</sub>H<sub>13</sub>I<sub>2</sub>NO: C, 39.29; H, 2.68; N, 2.86. Found: C, 39.21; H, 2.76; N, 2.51.

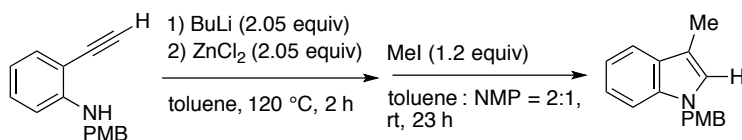

**1-(4-Methoxybenzyl)-3-methylindole (Table 1, entry 2):** In an oven-dried Schlenk tube, 2-ethynyl-*N*-(4-methoxybenzyl)aniline **1** (95 mg, 0.40 mmol) was dissolved in Et<sub>2</sub>O (0.8 mL), and BuLi in hexane (1.59 mol/L, 0.52 mL, 0.82 mmol) was added at 0 °C. A solution of ZnCl<sub>2</sub> in THF (1.0 mol/L, 0.82 mL, 0.82 mmol) was added dropwise at room temperature. Volatiles were removed in *vacuo*, and then toluene (0.8 mL) was added. The resulting mixture was stirred at 120 °C for 2 h, to give a yellow suspension. After cooling the reaction mixture at 0 °C, NMP (0.4 mL) and

iodomethane (29.8 mL, 0.48 mmol) was added. The reaction mixture was stirred at room temperature for 16 h, and was quenched with aq.  $\text{NH}_4\text{Cl}$ . The reaction mixture was extracted with ethyl acetate (3×5 mL), and the solvent was removed in *vacuo*, to afford a yellow oily product. The product was purified by silica gel column chromatography (eluent: 1.5% ethyl acetate and 0.2% triethylamine in hexane) to give the mixture of the title compound as a yellow oil (NMR yield, 73%) with inseparable byproducts: 7% of unsubstituted indole **2** and 6% of 2,3-dimethylindole (yield determined by NMR). 2-Methylindole was not observed at all by GC or NMR. GPC using chloroform as an eluent to afford the title compound as a yellow oil. Deuterium incorporation was determined by using the same procedure, following by quenching with  $\text{D}_2\text{O}$  and GC MS analysis by comparison with the isotope pattern of the corresponding protio compound.  $^1\text{H}$  NMR (400 MHz,  $\text{CDCl}_3$ ):  $\delta$  2.32 (s, 3H), 3.75 (s, 3H), 5.19 (s, 2H), 6.81 (d,  $J = 9.0$  Hz, 2H), 6.87 (s, 1H), 7.06-7.11 (m, 3H), 7.17 (t, 1H), 7.27 (s, 1H), 7.57 (d,  $J = 7.5$  Hz, 1H);  $\text{C}^{13}$  NMR (100 MHz):  $\delta$  9.63, 49.2, 55.3, 109.4, 110.7, 114.0 (2C), 118.7, 119.0, 121.5, 125.6, 128.2 (2C), 128.9, 129.9, 136.5, 158.9; HRMS (APCI+) Calcd. for  $\text{C}_{17}\text{H}_{17}\text{NO}$  (M): 251.1305; Found: 251.1315.

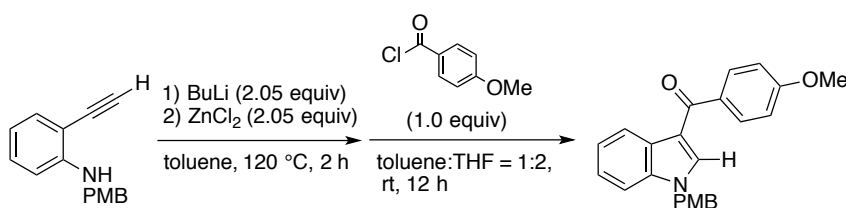

**3-(4-Methoxybenzoyl)-1-(4-methoxybenzyl)indole (Table 1, entry 3):** In an oven-dried Schlenk tube, 2-ethynyl-*N*-(4-methoxybenzyl)aniline **1** (47 mg, 0.20 mmol) was dissolved in  $\text{Et}_2\text{O}$  (0.4 mL), and a solution of BuLi in hexane (1.59 mol/L, 0.26 mL, 0.41 mmol) was added at 0 °C.  $\text{ZnCl}_2$  in THF (1 mol/L, 0.41 mL, 0.41 mmol) was added at room temperature. Solvents were removed in *vacuo*, and then toluene (0.4 mL) was added. The resulting mixture was stirred at 120 °C for 2 h. After cooling the reaction mixture at room temperature, THF (0.8 mL) was added. *p*-Methoxybenzoyl chloride (27 mL, 0.20 mmol) was added to resulting clear orange solution. The reaction mixture was stirred at room temperature for 12 h, and then it was quenched with aq.  $\text{NH}_4\text{Cl}$ . The reaction mixture was extracted with AcOEt, and the solvent was removed in *vacuo* to afford a dark yellow oily product. The product was purified by silica gel column chromatography (eluent: 40% ethyl acetate in hexane) to give the title compound (54.1 mg, 73%) as a white solid. 2-Aroylindole and 2,3-diaroylindole were not observed at all (NMR). Unsubstituted indole **2** was

recovered in 20% (GC). Deuterium incorporation was determined by using the same procedure, following by quenching with D<sub>2</sub>O and GC MS analysis by comparison with the isotope pattern of the corresponding protio compound. <sup>1</sup>H NMR (500 MHz, CDCl<sub>3</sub>): δ 3.75 (s, 3H), 3.85 (s, 3H), 5.26 (s, 2H), 6.83 (td, *J* = 8.5 Hz, 2.0 Hz, 2H), 6.95 (td, *J* = 8.5 Hz, 2.0 Hz, 2H), 7.07 (d, *J* = 8.5 Hz, 2H), 7.24-7.33 (m, 3H), 7.60 (s, 1H), 7.83 (td, *J* = 9.0 Hz, 2.5 Hz, 2H), 8.38 (dd, *J* = 6.8 Hz, 1.3 Hz, 1H), <sup>13</sup>C NMR (125 MHz): δ 50.2 (2C), 55.2 (2C), 55.3, 110.13, 113.5 (2C), 114.3 (2C), 116.0, 122.5, 122.6, 123.5, 127.5, 127.8, 128.3 (2C), 130.9 (2C), 133.3, 136.2, 136.9, 159.4, 162.2, 189.7; Melting Point: 122-123 °C; HRMS (APCI+) Calcd. for C<sub>24</sub>H<sub>21</sub>NO<sub>3</sub> (M): 371.1516; Found: 371.1529. The structure of the compound was confirmed by NOE experiments in CDCl<sub>3</sub>. When signal Ha at δ = 7.60 (s, 1H) was irradiated, Hb at δ = 7.83 (td, *J* = 9.0 Hz, 2.5 Hz, 2H) exhibited an enhancement by 5.5%, and 5.30 (s, 2H) exhibited an enhancement by 3.5%.

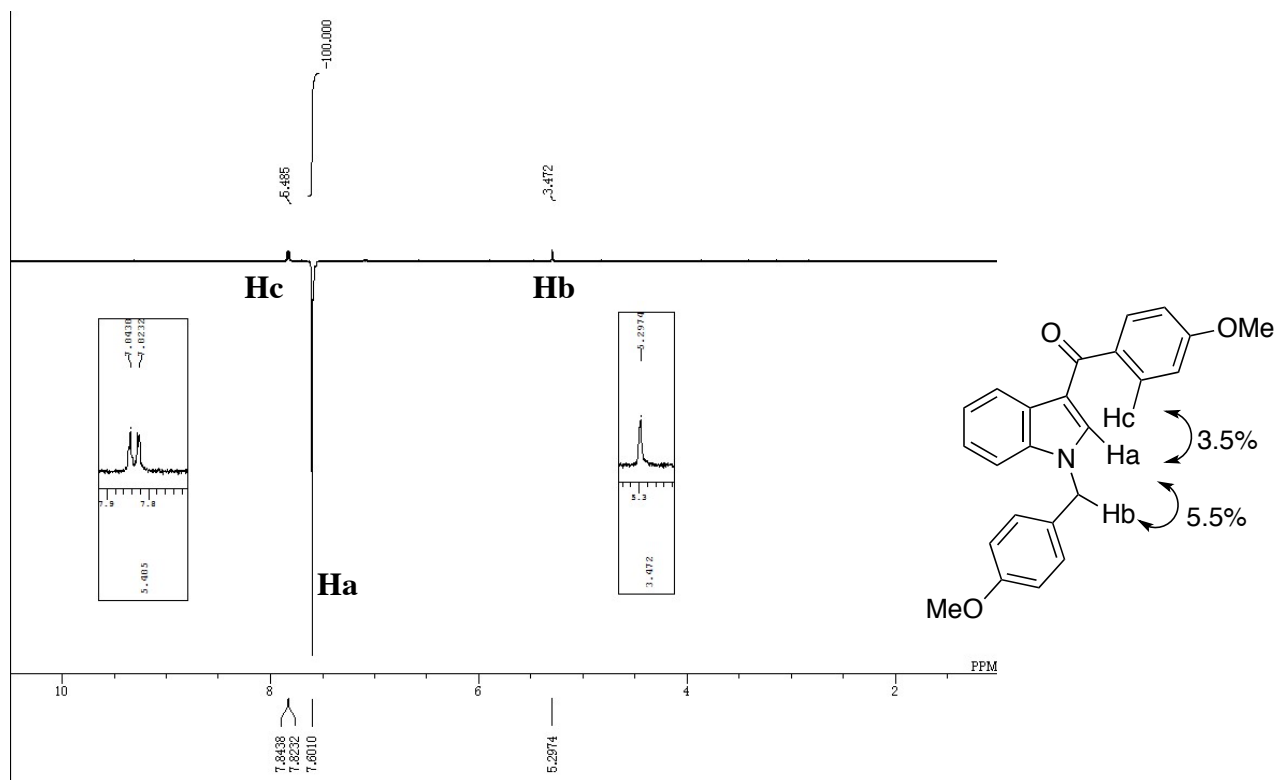

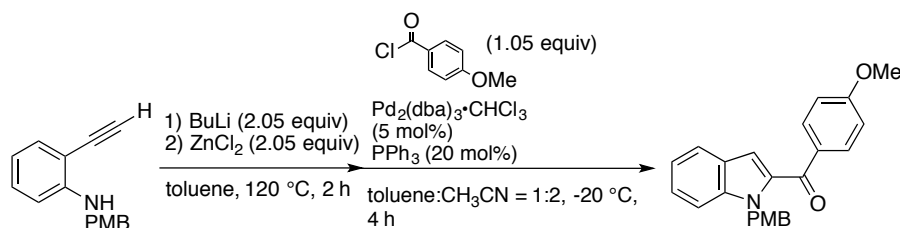

**3-(4-Methoxybenzoyl)-1-(4-methoxybenzyl)indole (Table 1, entry 4):** In an oven-dried Schlenk tube, 2-ethynyl-*N*-(4-methoxybenzyl)aniline **1** (47 mg, 0.20 mmol) was dissolved in Et<sub>2</sub>O (0.4 mL), and a solution of BuLi in hexane (1.59 mol/L, 0.26 mL, 0.41 mmol) was added at 0 °C. ZnCl<sub>2</sub> in THF (1 mol/L, 0.41 mL, 0.41 mmol) was added at room temperature. Solvents were removed *in vacuo*, and then toluene (0.4 mL) was added. The resulting mixture was stirred at 120 °C for 2 h. After cooling the reaction mixture at rt, half of the toluene was removed *in vacuo* and THF (0.8 mL) was added, then the reaction mixture was cooled to -20 °C. A solution of triphenylphosphine (10.5 mg, 0.04 mmol) and Pd<sub>2</sub>(dba)<sub>3</sub>•CHCl<sub>3</sub> (10.4 mg, 0.01 mmol) in THF (0.2 mL) was added, then *p*-methoxybenzoylchloride (28 uL, 0.21 mmol) were sequentially added. The reaction mixture was stirred at -20 °C for 4 h, and then it was quenched with aq. NH<sub>4</sub>Cl. The reaction mixture was extracted with AcOEt, and the solvent was removed *in vacuo* to afford a dark brown oily product. The product was purified by silica gel column chromatography (eluent: 25% ethyl acetate in hexane) to give the title compound as a white solid (38 mg, 51%). 3-Aroylindole formed in 1% (GC) and 2,3-diaroylindole formed in 14% (NMR). Unsubstituted indole **2** was recovered in 13% (GC). Deuterium incorporation was determined by using the same procedure, following by quenching with D<sub>2</sub>O and GC MS analysis by comparison with the isotope pattern of the corresponding protio compound. <sup>1</sup>H NMR (500 MHz, CDCl<sub>3</sub>): δ 3.73 (s, 3H), 3.90 (s, 3H), 5.76 (s, 2H), 6.75-6.77 (m, 2H), 6.96-6.98 (m, 2H), 7.03 (s, 1H), 7.07-7.08 (m, 2H), 7.16 (t, *J* = 1.0 Hz, 1H), 7.34 (t, *J* = 1.0 Hz, 1H), 7.42 (d, *J* = 8.0 Hz, 1H), 7.69 (d, *J* = 8.0 Hz, 1H), 7.91-7.93 (m, 1H); C<sup>13</sup> NMR (100 MHz): δ 47.4, 55.2, 55.5, 111.0, 113.5 (2C), 113.9 (2C), 114.4, 120.9, 122.8, 125.7, 126.1, 127.9 (2C), 130.5, 131.9 (2C), 132.1, 135.0, 139.8, 158.6, 163.1, 187.3; HRMS (APCI+) Calcd. for C<sub>24</sub>H<sub>21</sub>NO<sub>3</sub> (M): 371.1516; Found: 371.1518. The regiochemistry of the compound was determined by NOE experiments in CDCl<sub>3</sub>. When signal Ha at δ = 7.03 (s, 2H) was irradiated, Hb at δ = 7.69 (d, *J* = 8.0 Hz, 1H) exhibited an enhancement by 9.5%, and Hc at δ = 7.93 (m, 2H) exhibited an enhancement by 3.4%.

When signal Ha at δ = 5.75 (s, 2H) was irradiated, Hb at δ = 7.42 (d, *J* = 8.0 Hz, 1H) exhibited an

enhancement by 15%, and Hc at  $\delta = 7.08$  (m, 2H) exhibited an enhancement by 10%.

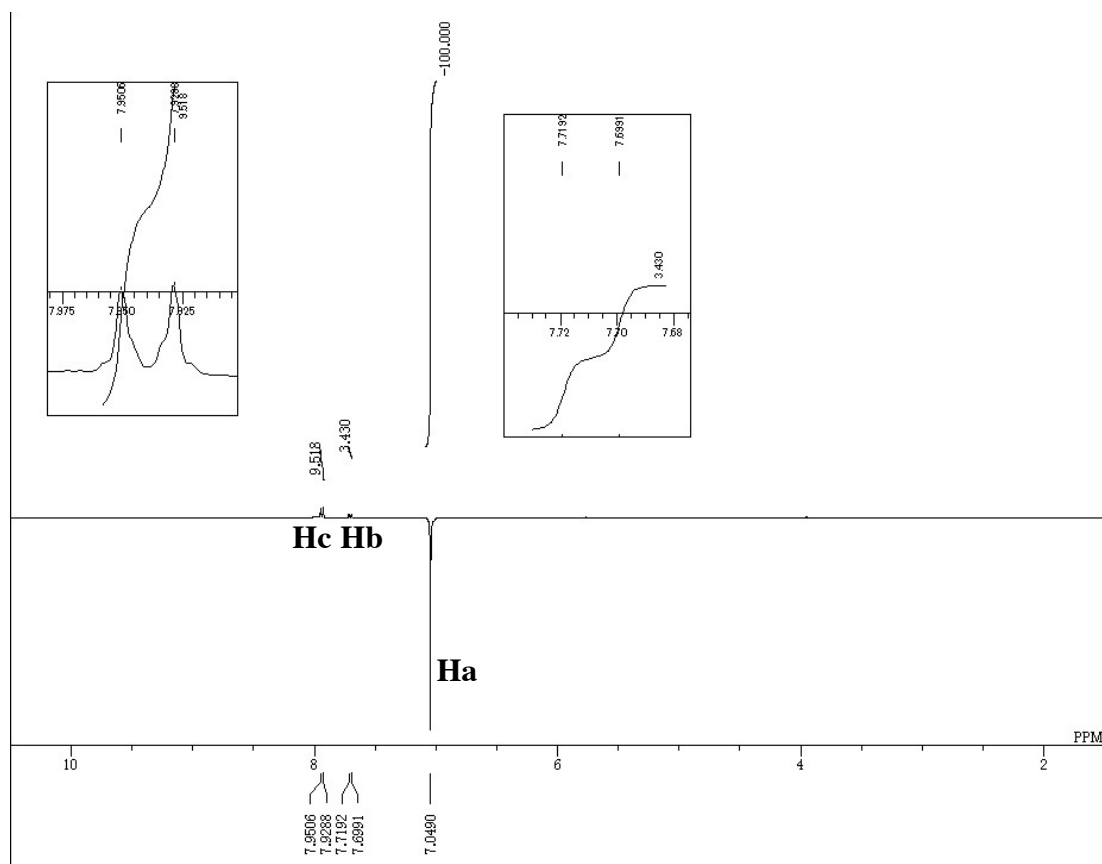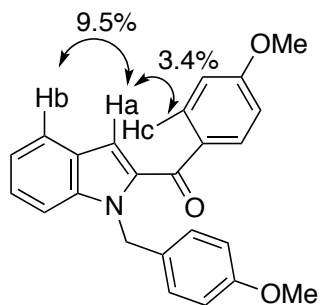



give a yellow suspension. After cooling the reaction mixture to 0 °C, THF (0.4 mL) was added to give a clear yellow solution. (Trimethylsilyl)methylmagnesium chloride (0.93 mol/L, 0.44 mL, 0.41 mmol) was added dropwise and the reaction mixture was stirred at 0 °C for 1 h. After raising the temperature to room temperature, iodocyclohexane (0.18 mL, 294 mg, 1.40 mmol), *N,N,N',N'*-Tetramethylethylenediamine (TMEDA) (61 µL, 48 mg, 0.41 mmol), and iron(II)chloride (2.5 mg, 0.02 mmol) were sequentially added. The reaction mixture was stirred at 30 °C for 17 h, and then it was quenched with aq. D<sub>2</sub>O. The organic phase was extracted with ethyl acetate (3×5 mL). Then the reaction mixture was passed over a pad of Florisil and the solvent was removed in *vacuo*. The product was purified by silica gel column chromatography (eluent: 40% chloroform and 1% triethylamine in hexane), and then GPC using chloroform as an eluent to afford the title compound as a white solid (30 mg, 47%). Dicyclohexylindole formed in a trace amount (GC), 3-cyclohexylindole formed in 13% (NMR), and protonated indole **2** was recovered in 19% (NMR). Deuterium incorporation was determined by using the same procedure, following by quenching with D<sub>2</sub>O and GC MS analysis by comparison with the isotope pattern of the corresponding protio compound. Melting point: 135-136 °C; <sup>1</sup>H NMR (500 MHz, CDCl<sub>3</sub>): δ 1.25-1.35 (m, 3H), 1.43-1.48 (q, *J* = 12 Hz, 2H), 1.73 (d, *J* = 10 Hz, 1H), 1.80 (d, *J* = 10 Hz, 2H), 1.92 (d, *J* = 11 Hz, 2H), 2.62 (m, 1H), 3.75 (s, 3H), 5.28 (s, 2H), 6.33 (s, 1H), 6.78 (d, *J* = 8.9 Hz, 2H), 6.88 (d, *J* = 8.9 Hz, 2H), 7.06 (m, 2H), 7.15 (m, 1H), 7.57 (m, 1H); C<sup>13</sup> NMR (100 MHz): δ 26.1, 26.7, 33.7, 26.0, 45.9, 55.2, 97.3, 109.5, 114.1 (2C), 119.4, 119.8, 120.7, 127.0, 128.2, 130.2, 136.8, 146.9, 158.7; HRMS (APCI+) Calcd. for C<sub>22</sub>H<sub>25</sub>NO(M): 319.1931 Found: 319.1932. The regiochemistry of the compound was determined by NOE experiments in CDCl<sub>3</sub>. When signal Ha at δ = 6.33 (s, 1H) was irradiated, Hb at δ = 7.57 (m, 1H) exhibited an enhancement by 3.5%, and Hc at δ = 1.45-1.48 (m, 2H) exhibited an enhancement by 1.3%.

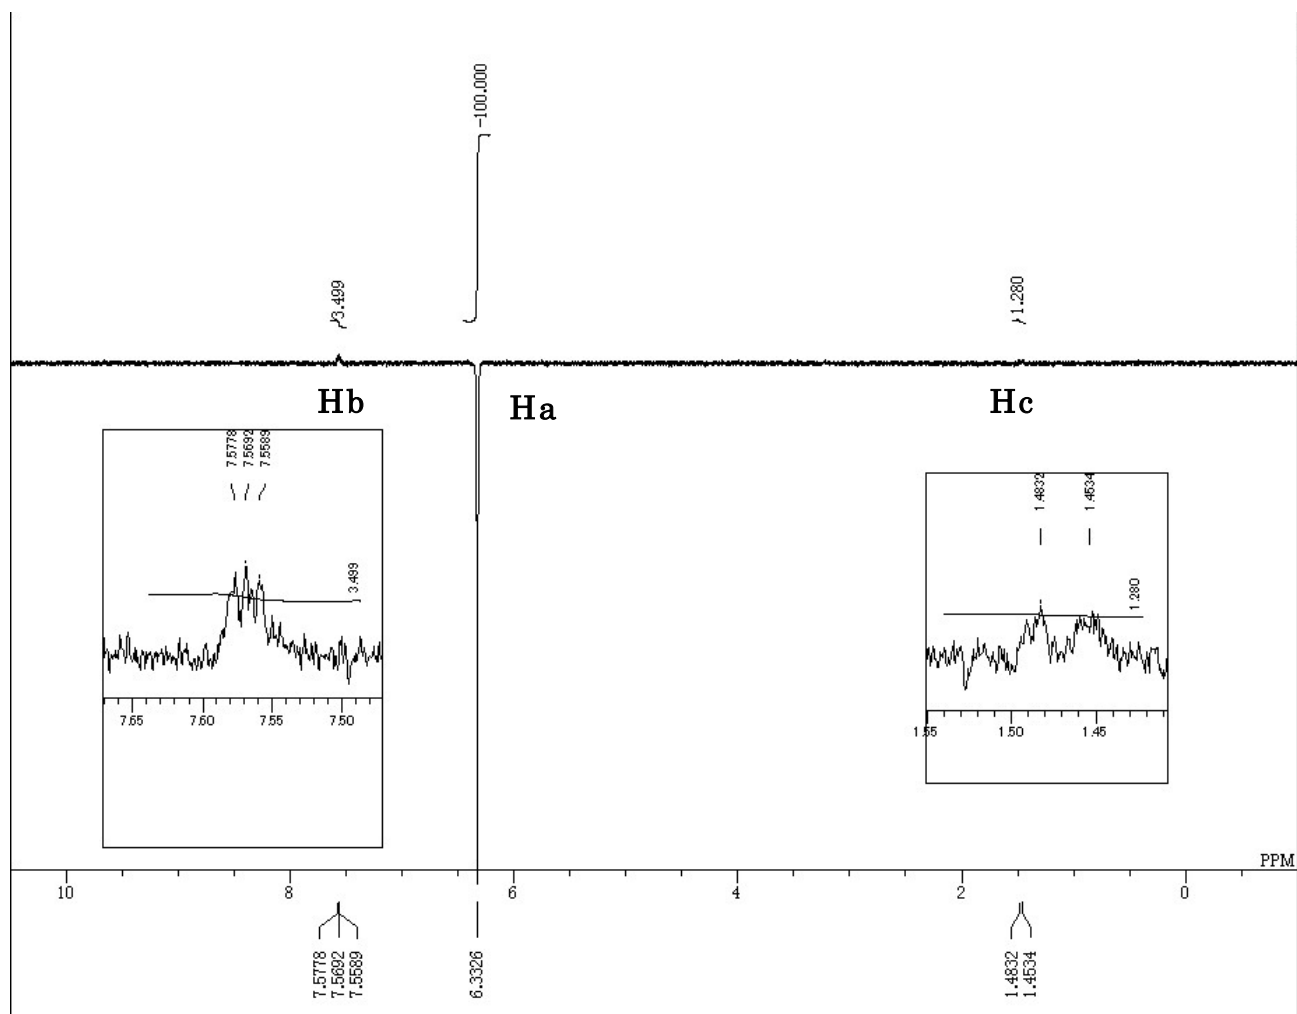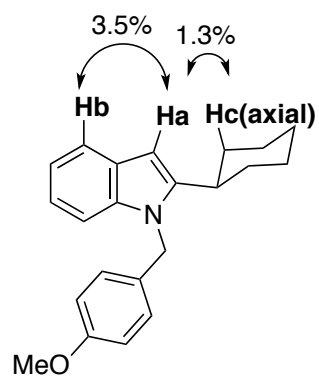



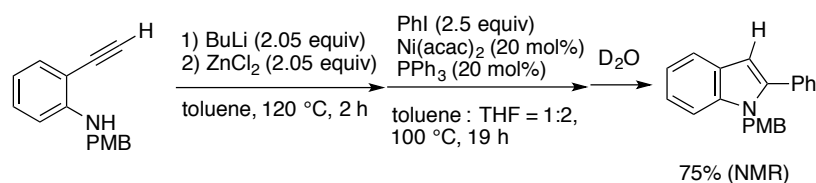

**1-(4-Methoxybenzyl)-2-phenylindole (Table 1, entry 6):** In an oven-dried Schlenk tube, 2-ethynyl-*N*-(4-methoxybenzyl)aniline **1** (47 mg, 0.20 mmol) was dissolved in Et<sub>2</sub>O (0.4 mL), and BuLi in hexane (1.59 mol/L, 0.26 mL, 0.41 mmol) was added dropwise at 0 °C. A solution of ZnCl<sub>2</sub> in THF (1 mol/L, 0.41 mL, 0.41 mmol) was added at room temperature. Volatiles were removed in *vacuo*, and then toluene (0.4 mL) was added. The resulting mixture was stirred at 120 °C for 2 h, to give a yellow suspension. After cooling the reaction mixture to room temperature, THF (0.8 mL) was added to give a clear yellow solution. Iodobenzene (55.8 μL, 102 mg, 0.50 mmol), triphenylphosphine (10.5 mg, 0.04 mmol), and nickel(II) acetylacetonate (Ni(acac)<sub>2</sub>) (10.3 mg, 0.04 mmol) were sequentially added. The reaction mixture was stirred at 100 °C for 19 h, and then it was quenched with aq. D<sub>2</sub>O. The organic phase was extracted with ethyl acetate (3×5 mL). The yield of the title compound was determined by NMR (75%). Diphenylindole formed 4% (GC), and protonated indole **2** was recovered in 18%. Deuterium incorporation was determined by using the same procedure, following by quenching with D<sub>2</sub>O and GC MS analysis by comparison with the isotope pattern of the corresponding protio compound. The compound data was in good agreement with the literature.<sup>5</sup>

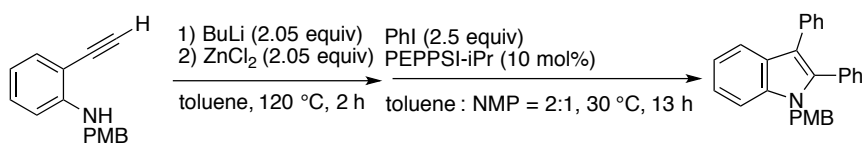

**1-(4-Methoxybenzyl)-2,3-diphenylindole (Table 1, entry 7):** In an oven-dried Schlenk tube, 2-ethynyl-*N*-(4-methoxybenzyl)aniline **1** (95 mg, 0.40 mmol) was dissolved in Et<sub>2</sub>O (0.8 mL), and BuLi in hexane (1.59 mol/L, 0.52 mL, 0.82 mmol) was added dropwise at 0 °C. A solution of ZnCl<sub>2</sub> in THF (1.0 mol/L, 0.82 mL, 0.82 mmol) was added at room temperature. Volatiles were removed in *vacuo*, and then toluene (0.8 mL) was added. The resulting mixture was stirred at 120 °C for 2 h, to give a yellow suspension. After cooling the reaction mixture to room temperature, NMP (0.4 mL) was added to give a clear yellow solution. Iodobenzene (0.11 mL, 204 mg, 1.00 mmol) and bis[(diisopropylphenyl)imidazolylidene]-(3-chloropyridyl)palladium(II) (PEPPSI-iPr) (27 mg, 0.04 mmol) were sequentially added. The reaction mixture was stirred at 30 °C for 13 h, and then it was

quenched with aq.  $\text{NH}_4\text{Cl}$ . The organic phase was extracted with ethyl acetate (3×5 mL). Then the reaction mixture was passed over a pad of Florisil and the solvent was removed in *vacuo* to afford a dark brown oily product. The product was purified by silica gel column chromatography (eluent: 7% ethyl acetate and 1% triethylamine in hexane) to give the title compound (136 mg, 87%) as a white solid. Monophenylindole formed in 9% (GC). Deuterium incorporation was determined by using the same procedure, following by quenching with  $\text{D}_2\text{O}$  and GC MS analysis by comparison with the isotope pattern of the corresponding protio compound. Melting point: 121-122 °C;  $^1\text{H}$  NMR (500 MHz,  $\text{CDCl}_3$ ):  $\delta$  3.80 (s, 3H), 5.28 (s, 2H), 6.82 (d,  $J$  = 8.0 Hz, 2H), 6.97 (d,  $J$  = 8.0 Hz, 2H), 7.20-7.38 (m, 13H), 7.85 (d,  $J$  = 7.0 Hz, 1H);  $^{13}\text{C}$  NMR (125 MHz):  $\delta$  47.0, 55.2, 110.5, 114.0 (2C), 115.5, 119.6, 120.3, 122.3, 125.5, 127.3 (3C), 128.1, 128.1 (2C), 128.3 (2C), 129.9, 130.0 (2C), 130.1, 131.1 (2C), 131.8, 135.1, 136.9, 137.8; HRMS (APCI+) Calcd. for  $\text{C}_{28}\text{H}_{23}\text{NO}$ (M): 389.1774; Found: 389.1774.

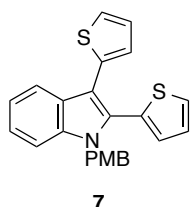

**1-(4-Methoxybenzyl)-2,3-di(thien-2-yl)indole (Table 1, entry 8):** Obtained in 67% yield as a white solid. Monothienylindole formed in 15%, and protonated indole **2** was recovered in 6% (GC). Deuterium incorporation was determined by using the same procedure, following by quenching with  $\text{D}_2\text{O}$  and GC MS analysis by comparison with the isotope pattern of the corresponding protio compound. Melting Point: 131-132 °C;  $^1\text{H}$  NMR (500 MHz,  $\text{CDCl}_3$ ):  $\delta$  3.76 (s, 3H), 5.26 (s, 2H), 6.79 (d,  $J$  = 8.0 Hz, 2H), 6.94 (d,  $J$  = 8.0 Hz, 2H), 7.02-7.09 (m, 4H), 7.11-7.27 (m, 4H), 7.45 (d,  $J$  = 5.0 Hz, 1H), 7.95 (d,  $J$  = 7.5 Hz, 1H);  $^{13}\text{C}$  NMR (125 MHz): 47.0, 55.2, 110.4, 114.0 (2C), 114.1, 112.1, 120.7, 123.1, 123.8, 125.1, 126.6, 126.8, 127.2, 127.3 (2C), 128.4, 129.8, 130.1, 130.7, 131.5, 136.6, 136.7, 158.7; HRMS (APCI+) Calcd. for  $\text{C}_{24}\text{H}_{19}\text{NOS}_2$  (M): 401.0903; Found: 401.0908.

### Gram-Scale Reaction

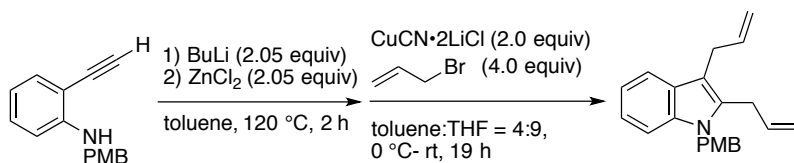

**2,3-Diallyl-1-(4-methoxybenzyl)indole (Scheme 2 and Table 1, entry 9):** In an oven-dried Schlenk

tube, 2-ethynyl-*N*-(4-methoxybenzyl)aniline **1** (1.00 g, 4.22 mmol) was dissolved in Et<sub>2</sub>O (4.0 mL), and BuLi in hexane (1.64 mol/L, 5.27 mL, 8.65 mmol) was added at 0 °C. A solution of ZnCl<sub>2</sub> in THF (1.0 mol/L, 8.65 mL, 8.65 mmol) was added dropwise at room temperature. Volatiles were removed in *vacuo*, and then toluene (4.22 mL) was added. The resulting mixture was stirred at 120 °C for 2 h, to give a yellow suspension. After cooling the reaction mixture at 0 °C, CuCN•2LiCl in THF (1 mol/L, 9.28 mL, 9.28 mmol), then allyl bromide (1.46 mL, 2.04 g, 16.88 mmol) were sequentially added. The reaction mixture was stirred at room temperature for 19 h, and then it was quenched with aq. NH<sub>4</sub>Cl. The reaction mixture was extracted with ethyl acetate (5×5 mL), and the solvent was removed in *vacuo* to afford a yellow oily product. The product was purified by silica gel column chromatography (eluent: 7% ethyl acetate and 1% triethylamine in hexane) to give the of title compound (1.20 mg, 89%). Monoallylindole formed in 8% (GC). <sup>1</sup>H NMR (500 MHz, CDCl<sub>3</sub>): δ 3.43 (d, *J* = 3.5 Hz, 2H), 3.50 (d, *J* = 4.0 Hz, 2H), 3.71 (s, 3H), 4.93-5.08 (m, 4H), 5.22 (s, 2H), 5.79-5.87 (m, 1H), 5.95-6.02 (m, 1H), 6.76 (d, *J* = 8.5 Hz, 2H), 6.85 (d, *J* = 7.5 Hz, 2H), 7.06-7.12 (m, 2H), 7.18-7.19 (m, 1H), 7.57 (d, *J* = 6.5 Hz, 1H). <sup>13</sup>C NMR (125 MHz): δ 28.8 (2C), 45.9, 55.2, 109.3, 110.1, 114.0 (2C), 114.4, 116.1, 118, 121.1, 127.1(2C), 127.9, 130.2, 134.0, 135.1, 136.6, 137.6, 158.7; HRMS (APCI+) Calcd. for C<sub>22</sub>H<sub>23</sub>NO (M): 317.1774; Found: 317.1784.

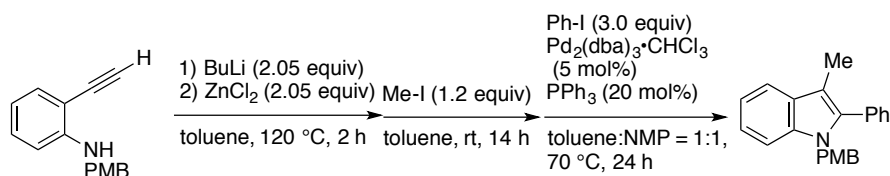

**1-(4-Methoxybenzyl)-3-methyl-2-phenylindole (Table 1, entry 10):** In an oven-dried Schlenk tube, 2-ethynyl-*N*-(4-methoxybenzyl)aniline **1** (95 mg, 0.40 mmol) was dissolved in Et<sub>2</sub>O (0.8 mL), and BuLi in hexane (1.59 mol/L, 0.52 mL, 0.82 mmol) was added at 0 °C. A solution of ZnCl<sub>2</sub> in THF (1.0 mol/L, 0.82 mL, 0.82 mmol) was added dropwise at room temperature. Volatiles were removed *in vacuo*, and then toluene (0.8 mL) was added. The resulting mixture was stirred at 120 °C for 2 h, to give a yellow suspension product. After cooling the reaction mixture to 0 °C, NMP (0.4 mL) and iodomethane (29.8 mL, 0.48 mmol) was added. The reaction mixture was stirred at room temperature for 14 h, then a solution of triphenylphosphine (21 mg, 0.08 mmol) and Pd<sub>2</sub>(dba)<sub>3</sub>•CHCl<sub>3</sub> (21 mg, 0.02 mmol) in NMP (0.4 mL), and iodobenzene (0.13 mL, 245 mg, 1.20 mmol) were sequentially added. The reaction mixture was stirred at 70 °C for 24 h, and then it was quenched with

aq.  $\text{NH}_4\text{Cl}$ . The reaction mixture was extracted with ethyl acetate (3×5 mL), and the solvent was removed in *vacuo*, to afford a yellow oily product. The product was purified by silica gel column chromatography (eluent: 1% ethyl acetate and 0.2% triethylamine in hexane), and then GPC using toluene as an eluent to afford the title compound as a yellow oil (83 mg, 64%). 3-Methylindole formed in 7%, 2,3-dimethylindole formed in 4%, 2-phenylindole formed in 6%, 2,3-diphenylindole formed in a trace amount, and unsubstituted indole **2** was recovered in 5% (GC). Deuterium incorporation was determined by using the same procedure, following by quenching with  $\text{D}_2\text{O}$  and GC MS analysis by comparison with the isotope pattern of the corresponding protio compound.  $^1\text{H}$  NMR (500 MHz,  $\text{CDCl}_3$ ):  $\delta$  2.30 (s, 3H), 3.70 (s, 3H), 5.15 (s, 2H), 6.73 (d,  $J$  = 8.0 Hz, 2H), 6.85 (d,  $J$  = 7.5 Hz, 2H), 7.15-7.18 (m, 3H), 7.31-7.38 (m, 5H), 7.61 (d,  $J$  = 6.0 Hz, 1H).  $^{13}\text{C}$  NMR (125 MHz):  $\delta$  9.4, 47.0, 55.1, 109.0, 110.2, 113.9 (2C), 118.8, 119.3, 121.8, 127.2 (2C), 127.8, 128.3 (2C), 128.8, 130.5 (3C), 132.1, 136.7, 137.8, 158.5; HRMS (APCI+) Calcd. for  $\text{C}_{23}\text{H}_{21}\text{NO}$  (M): 327.1618; Found: 327.1615.

The regiochemistry of the compound was determined by NOE experiments in  $\text{CDCl}_3$ . When signal Ha at  $\delta$  = 2.30 (s, 3H) was irradiated, Hb at  $\delta$  = 7.61 (d,  $J$  = 8.0 Hz, 1H) exhibited an enhancement by 13%, and Hc at  $\delta$  = 7.32 (m, 2H) exhibited an enhancement by 9.4%.

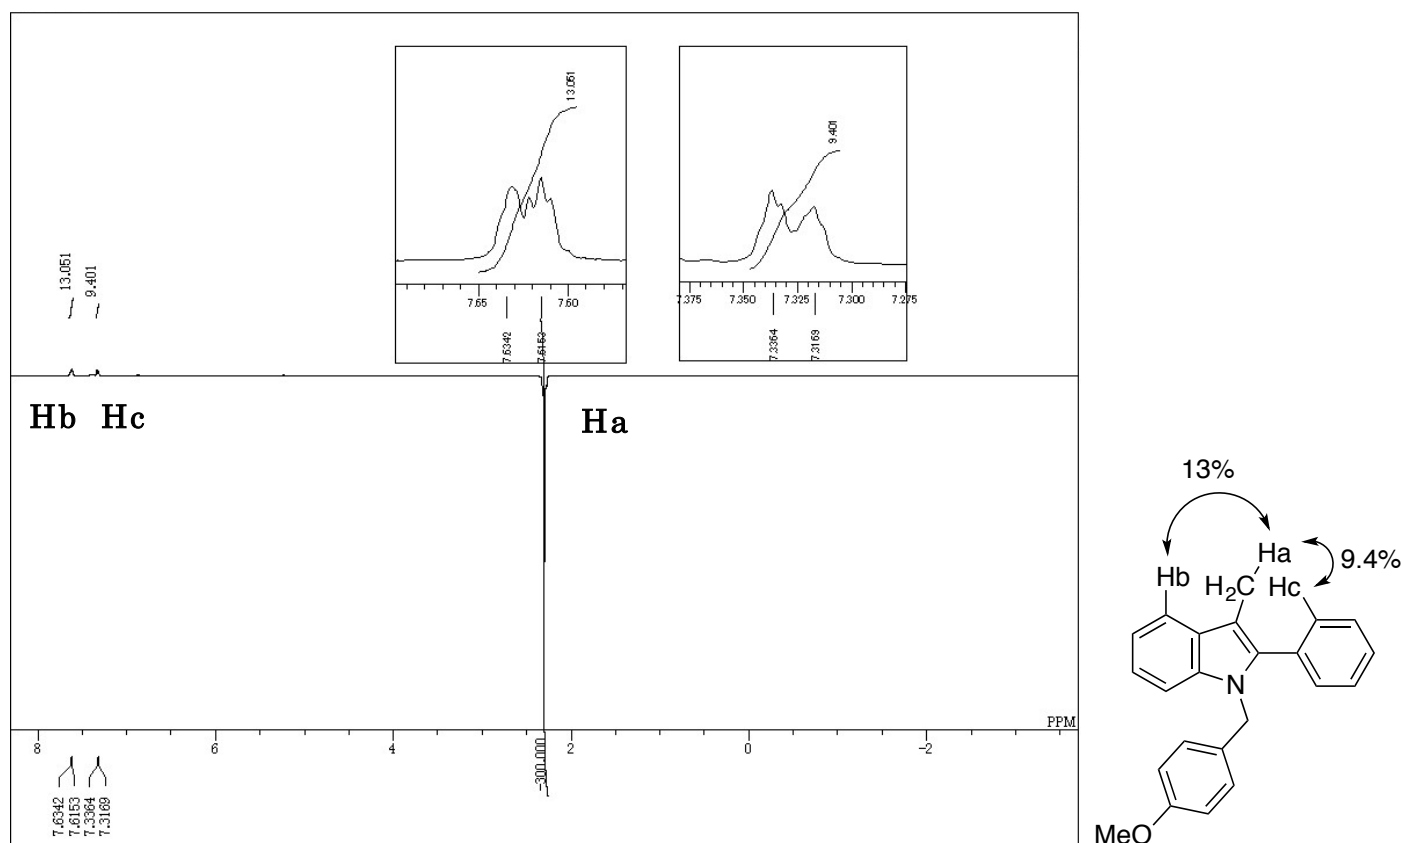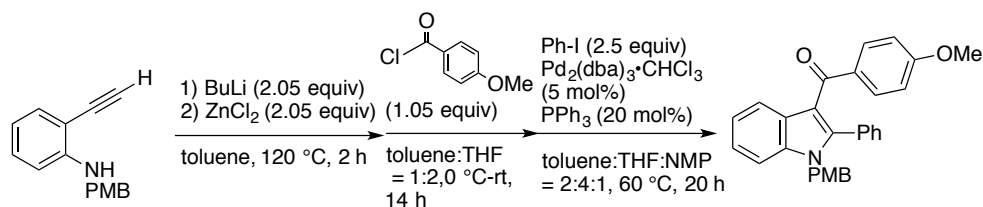

**3-(4-Methoxybenzoyl)-1-(4-methoxybenzyl)indole (Table 1, entry 11):** In an oven-dried Schlenk tube, 2-ethynyl-N-(4-methoxybenzyl)aniline **1** (95 mg, 0.40 mmol) was dissolved in Et<sub>2</sub>O (0.8 mL), and BuLi in hexane (1.59 mol/L, 0.52 mL, 0.82 mmol) was added at 0 °C. A solution of ZnCl<sub>2</sub> in THF (1.0 mol/L, 0.82 mL, 0.82 mmol) was added dropwise at room temperature. Volatiles were removed *in vacuo*, and then toluene (0.8 mL) was added. The resulting mixture was stirred at 120 °C for 2 h, to give a yellow suspension. After cooling the reaction mixture at room temperature, THF (1.6 mL) was added. To resulting clear orange solution, *p*-methoxybenzoyl chloride (57 μL, 0.42 mmol) was added. The reaction mixture was stirred at room temperature for 14 h, then a solution of triphenylphosphine (21 mg, 0.08 mmol) and Pd<sub>2</sub>(dba)<sub>3</sub>•CHCl<sub>3</sub> (21 mg, 0.02 mmol) in NMP (0.8 mL), and iodobenzene (0.11 mL, 204 mg, 1.00 mmol) were sequentially added. The reaction mixture was stirred at 60 °C for 20 h, and then it was quenched with aq. NH<sub>4</sub>Cl. The

product was purified by silica gel column chromatography (eluent: 30% ethyl acetate and 1% triethylamine in hexane) to give the title compound (134.8 mg, 76%) as a white solid. 3-Aroylindole formed in 5%, 2-phenylindole formed in 12%, 2,3-diphenylindole formed in 5%, and unsubstituted indole **2** was recovered in 5% (GC). Deuterium incorporation was determined by using the same procedure, following by quenching with D<sub>2</sub>O and GC MS analysis by comparison with the isotope pattern of the corresponding protio compound. <sup>1</sup>H NMR (500 MHz, CDCl<sub>3</sub>): δ 3.75 (s, 6H), 5.25 (s, 2H), 6.65 (d, *J* = 7.0 Hz, 2H), 6.78 (d, *J* = 7.5 Hz, 2H), 6.90 (d, *J* = 8.0 Hz, 2H), 7.18-7.25 (m, 7H), 7.27-7.29 (m, 1H), 7.61 (d, *J* = 7.0 Hz, 2H), 7.91-7.93 (m, 1H), C<sup>13</sup> NMR (125 MHz): δ 47.2, 55.2 (2C), 110.8, 112.8 (2C), 114.1 (2C), 115.3, 121.6, 122.1, 123.1, 127.2 (2C), 127.8, 128.1 (2C), 128.7, 129.0, 130.7, 130.8 (2C), 131.6 (2C), 132.5, 136.7, 145.5, 158.8, 162.1, 191.5; Melting Point: 104-105 °C; HRMS (APCI+) Calcd. for C<sub>30</sub>H<sub>25</sub>NO<sub>3</sub> (M): 447.1829; Found: 447.1845.

## 7. One Pot Synthesis of Indenoindolone

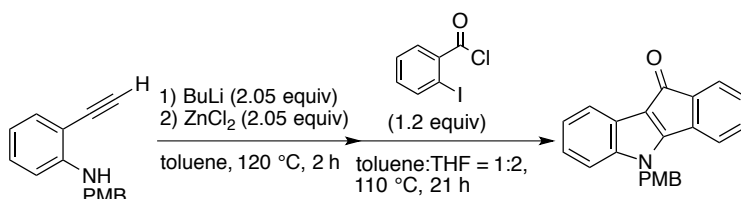

**5-(4-Methoxybenzyl)indeno[1,2-*b*]indol-10-one (Table 1, entry 12):** In an oven-dried Schlenk tube, 2-ethynyl-*N*-(4-methoxybenzyl)aniline **1** (94 mg, 0.40 mmol) was dissolved in Et<sub>2</sub>O (0.8 mL), and a solution of BuLi in hexane (1.59 mol/L, 0.52 mL, 0.81 mmol) was added at 0 °C. ZnCl<sub>2</sub> in THF (1 mol/L, 0.82 mL, 0.82 mmol) was added at room temperature. Solvents were removed *in vacuo*, and then toluene (0.8 mL) was added. The resulting mixture was stirred at 120 °C for 2 h. After cooling the reaction mixture to rt, half of the toluene was removed and THF (0.8 mL) was added. To the resulting clear orange solution, *o*-iodobenzoyl chloride (66 mL, 0.48 mmol) was added. The reaction mixture was stirred 110 °C for 21 h, and then it was quenched with aq. NH<sub>4</sub>Cl. The reaction mixture was extracted with chloroform, and the solvent was removed *in vacuo* to afford a dark orange solid product. The product was purified by silica gel column chromatography (eluent: 20% ethyl acetate in hexane), and then GPC using chloroform as an eluent to afford the title compound as an orange solid (79 mg, 58%). <sup>1</sup>H NMR (500 MHz, CDCl<sub>3</sub>): δ 3.77 (s, 3H), 5.46 (s, 2H), 6.85-6.87 (d, *J* = 8.5 Hz, 2H), 7.05-7.07 (m, 1H), 7.11-7.21 (m, 7H), 7.46-7.47 (m, 1H), 7.82 (d,

$J = 8.5$  Hz, 1H),  $C^{13}$  NMR (125 MHz):  $\delta$  48.3, 55.3, 110.1, 114.5 (2C), 115.5, 118.5, 120.8, 123.1 (2C), 123.2, 123.6, 127.5, 127.6 (2C), 129.6, 132.0, 134.7, 141.2, 142.6, 158.6, 159.4, 185.1. GCMS  $C_{24}H_{21}NO$   $m/z = 339.2$ . FAB<sup>+</sup>  $C_{24}H_{21}NO$   $m/z = 339.1258$ ; Melting Point: 191-192 °C; HRMS (APCI+) Calcd. for  $C_{23}H_{17}NO_2$  (M): 339.1254; Found: 339.1269.

### Control Experiment

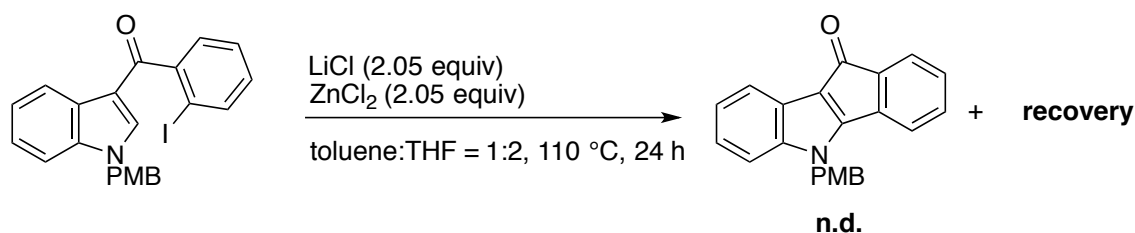

### 8. Synthesis of Benzodipyrrole

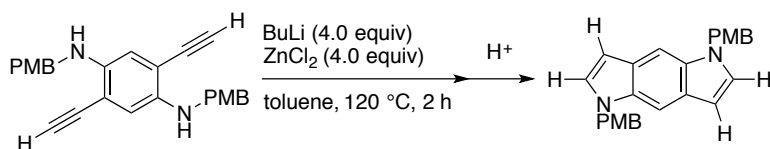

**1,5-bis(4-Methoxybenzyl)benzo[1,2-*b*:4,5-*b'*]dipyrrole (4a):** In an oven-dried Schlenk tube, 2,5-diethynyl-*N*<sup>1</sup>,*N*<sup>4</sup>-bis(4-methoxybenzyl)benzene-1,4-diamine (79 mg, 0.20 mmol) was dissolved in Et<sub>2</sub>O (1.6 mL), and BuLi in hexane (1.61 mol/L, 0.50 mL, 0.80 mmol) was added at 0 °C. A solution of ZnCl<sub>2</sub> in THF (1.0 mol/L, 0.80 mL, 0.80 mmol) was added at room temperature. Volatiles were removed in *vacuo*, and then toluene (1.6 mL) was added. The resulting mixture was stirred at 120 °C for 2 h, to give an orange suspension. The reaction was quenched with aq. NH<sub>4</sub>Cl. The reaction mixture was extracted with DCM (3×5 mL), and the solvent was removed in *vacuo*, to afford a dark green product. The product was passed over a pad of silica gel (eluent: ethylacetate) to give the title compound (73 mg, 92%) as a white solid. <sup>1</sup>H NMR (400 MHz, CDCl<sub>3</sub>):  $\delta$  3.75 (s, 6H), 5.27 (s, 4H), 6.50 (d,  $J = 3.0$  Hz, 2H), 6.81 (d,  $J = 8.5$  Hz, 4H), 7.07-7.12 (m, 6H), 7.44 (d,  $J = 7.8$  Hz, 2H). <sup>13</sup>C NMR (100MHz, CDCl<sub>3</sub>):  $\delta$  49.7 (2C), 55.2 (2C), 99.1 (2C), 100.1 (2C), 114.0 (4C), 126.5 (2C), 128.1 (4C), 128.9 (2C), 130.0 (2C), 133.5 (2C), 158.9 (2C); Melting Point: 186-187 °C; HRMS (APCI+) Calcd. for  $C_{26}H_{24}N_2O_2$  (M): 396.1832; Found: 396.1850.

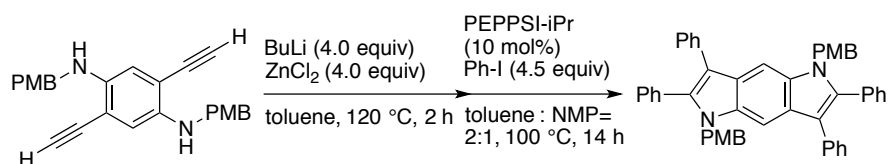

**1,5-bis(4-Methoxybenzyl)-2,3,6,7-tetraphenylbenzo[1,2-*b*:4,5-*b'*]dipyrrole (4b):** After the cyclization reaction, NMP (0.4 mL) was added. Iodobenzene (0.10 mL, 184 mg, 0.90 mmol) and bis[(diisopropylphenyl)imidazolyldiene]-(3-chloropyridyl)palladium(II) (PEPPSI-*i*Pr) (14 mg, 0.02 mmol) were sequentially added. The reaction mixture was stirred at 100 °C for 14 h, and then it was quenched with aq.  $\text{NH}_4\text{Cl}$ . The organic phase was extracted with chloroform (3×5 mL). Then the reaction mixture was passed over a pad of Florisil and the solvent was removed in *vacuo* to afford a dark black oily product. The yield (40%) was determined by  $^1\text{H}$ NMR using tetrachloroethane ( $\delta$  7.26, singlet, 2H) as an internal standard. A sample of pure product was obtained as a white solid after purification by GPC using chloroform as an eluent.  $^1\text{H}$  NMR (500 MHz,  $\text{CDCl}_3$ ):  $\delta$  3.76 (s, 6H), 5.24 (s, 4H), 6.77 (d,  $J$  = 6.3 Hz, 4H), 6.96 (d,  $J$  = 6.9 Hz, 4H), 7.12-7.17 (m, 2H), 7.26-7.29 (m, 18H), 7.62 (s, 2H).  $^{13}\text{C}$  NMR (125 MHz,  $\text{CDCl}_3$ ):  $\delta$  47.3 (2C), 55.2 (2C), 98.9 (2C), 113.9 (4C), 114.4 (2C), 125.2 (2C), 124.5 (2C), 127.6 (4C), 127.9 (2C), 128.1 (4C), 128.2 (4C), 129.8 (4C), 130.6 (2C), 131.1 (4C), 132.3 (2C), 134.8 (2C), 135.7 (2C), 138.7 (2C), 158.5 (2C); Melting Point: 280-281 °C; HRMS (APCI+) Calcd. for  $\text{C}_{50}\text{H}_{40}\text{N}_2\text{O}_2$  ( $\text{M}+\text{H}$ ): 701.3168; Found: 701.3178.

## 9. Cyclization with One Equivalent of Phenylzinc Bromide

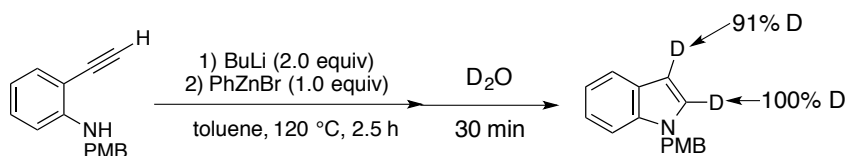

**2,3- $d_2$ -*N*-(4-Methoxybenzyl)indole (Table 2, entry 1):** In an oven-dried Schlenk tube, 2-ethynyl-*N*-(4-methoxybenzyl)aniline **1** (95 mg, 0.40 mmol) was dissolved in  $\text{Et}_2\text{O}$  (0.8 mL), and BuLi in hexane (1.59 mol/L, 0.52 mL, 0.82 mmol) was added at 0 °C. A solution of PhZnBr in THF (0.43 mol/L, 0.93 mL, 0.40 mmol) was added. After the heating the mixture to room temperature, volatiles were removed in *vacuo*, and then toluene (0.8 mL) was added. The resulting mixture was stirred at 120 °C for 2.5 h, to give a gray suspension product. The reaction was quenched with aq.  $\text{NH}_4\text{Cl}$ . The reaction mixture was extracted with ethyl acetate (3×5 mL), and the solvent was



removed in *vacuo*, which afforded a dark yellow oily product. The product was passed by over a pad of silica gel (eluent: 10% ethylacetate, 1% triethylamine in hexane) to give the title compound (94 mg, 98%) as a yellow oil. Deuterium incorporation was determined by  $^1\text{H}$  NMR (solvent:  $\text{THF-}d_8$ ), by comparison with the signals of *N*-(4-methoxybenzyl)indole (**2**).

## 10. Reactivity of Dimetallic Intermediates

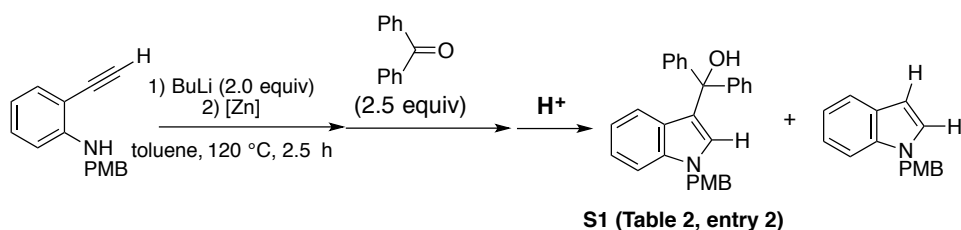

| [Zn]                          | yield of <b>S1</b> (%) <sup>a</sup> |
|-------------------------------|-------------------------------------|
| ZnCl <sub>2</sub> (2.0 equiv) | 2                                   |
| ZnCl <sub>2</sub> (1.0 equiv) | 18                                  |
| <b>PhZnBr (1.0 equiv)</b>     | <b>63</b>                           |

<sup>a</sup> NMR yield, (tetrachloroethane as an internal standard)

## 11. Reaction of Intermediate B<sup>2</sup> with Electrophiles

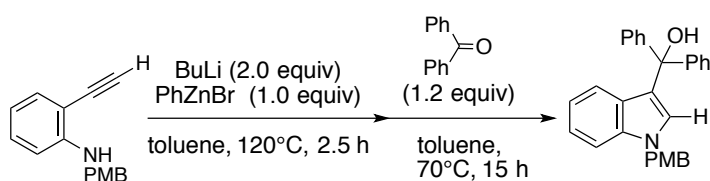

**(1-(4-Methoxybenzyl)-1H-indol-3-yl)diphenylmethanol (Table 2, entry 2):** In an oven-dried Schlenk tube, 2-ethynyl-*N*-(4-methoxybenzyl)aniline **1** (95 mg, 0.40 mmol) was dissolved in  $\text{Et}_2\text{O}$  (0.8 mL), and BuLi in hexane (1.59 mol/L, 0.52 mL, 0.82 mmol) was added at 0 °C. A solution of PhZnBr in THF (0.43 mol/L, 0.93 mL, 0.40 mmol) was added. After the heating the mixture to room temperature, volatiles were removed in *vacuo*, and then toluene (0.8 mL) was added. The resulting mixture was stirred at 120 °C for 2.5 h, which afforded a gray suspension product. After cooling the reaction mixture at room temperature, benzophenone (88 mg, 0.48 mmol) was added. The reaction mixture was stirred at 70 °C for 15 h, and was quenched with  $\text{NH}_4\text{Cl}$ . The reaction mixture was

extracted with AcOEt, and the solvent was removed in *vacuo* to afford a dark yellow oily product. The product was purified by silica gel column chromatography (eluent: 20% ethyl acetate, 1% triethylamine in hexane) to give the title compound (127 mg, 76%) as a white solid. 2-Substituted and 2,3-disubstituted product was not observed at all. Unsubstituted indole **2** was recovered in 18% (NMR). Deuterium incorporation was determined by using the same procedure, following by quenching with D<sub>2</sub>O and GC MS analysis by comparison with the isotope pattern of the corresponding protio compound. <sup>1</sup>H NMR (400 MHz, CDCl<sub>3</sub>): δ 2.92 (s, 1H), 3.77 (s, 3H), 5.17 (s, 2 H), 6.55 (s, 1H), 6.81(d, *J* = 8.7 Hz, 2H), 6.96 (t, *J* = 8.0 Hz, 1H), 7.01 (d, *J* = 8.0 Hz, 2H), 7.14 (t, *J* = 8.0 Hz, 1H), 7.24-7.33 (m, 8H), 7.43-7.45 (m, 4H) <sup>13</sup>C NMR (100MHz, CDCl<sub>3</sub>): δ 49.5, 55.2, 78.4, 110.0, 114.0 (2C), 119.5, 121.6, 121.9, 122.0, 126.4, 126.8 (2C), 127.2 (4C), 127.8 (5C), 128.2, 128.9, 129.2, 130.0, 137.2, 146.5, 158.9; HRMS (APCI+) Calcd. for C<sub>29</sub>H<sub>25</sub>NO<sub>2</sub> (M): 419.1880; Found: 419.1888. The regiochemistry of the compound was determined by NOE experiments in CDCl<sub>3</sub>. When signal Ha at δ = 6.54 (s, 1H) was irradiated, Hb at δ = 5.16 (s, 2 H), exhibited an enhancement by 3.9%, and Hc at δ = 7.44 (m, 4H) exhibited an enhancement by 2.7%.

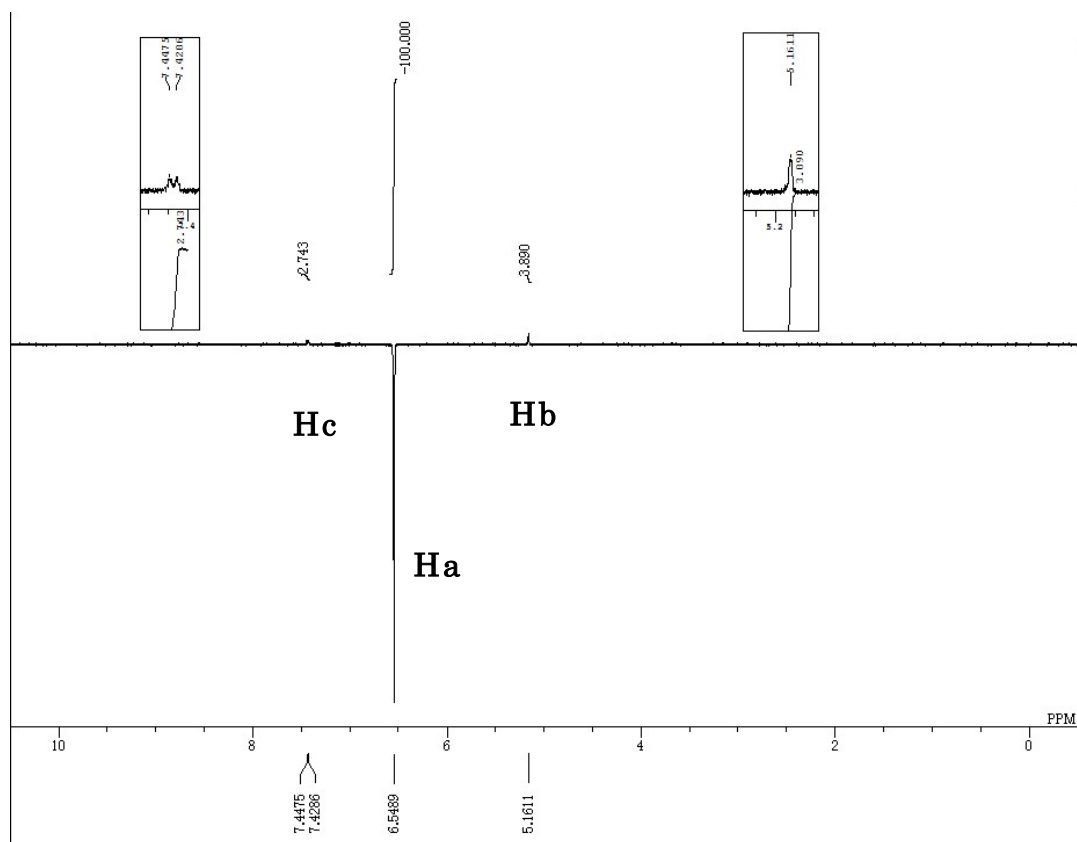

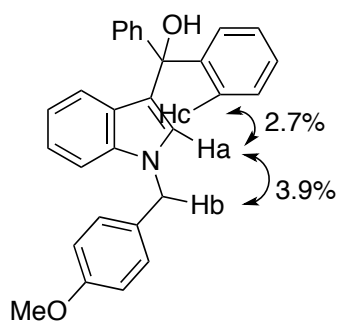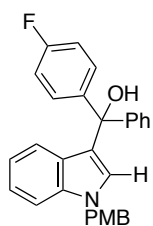

**(4-Fluorophenyl)(1-(4-methoxybenzyl)-1*H*-indol-3-yl)(phenyl)methanol (Table 2, entry 3):**

Obtained in 77% yield as a colorless oil. 2-Substituted and 2,3-disubstituted product was not observed at all. Unsubstituted indole **2** was recovered in 18% (NMR). Deuterium incorporation was determined by using the same procedure, following by quenching with D<sub>2</sub>O and GC MS analysis by comparison with the isotope pattern of the corresponding protio compound. <sup>1</sup>H NMR (400 MHz, CDCl<sub>3</sub>): δ 2.97 (s, 1H), 3.71 (s, 3H), 5.10 (s, 2 H), 6.52 (s, 1H), 6.78(d, *J* = 8.7 Hz, 2H), 6.93-6.99 (m, 5H), 7.14 (t, *J* = 8.0 Hz, 1H), 7.22-7.30 (m, 5H), 7.37-7.41 (m, 4H) <sup>13</sup>C NMR (100MHz, CDCl<sub>3</sub>): δ 49.6, 55.2, 78.1, 110.1, 114.1 (2C), 114.4, 114.6, 119.6, 121.5, 121.9, 122.0, 126.2, 127.0 (2C), 127.1, 127.8 (2C), 127.9, 128.8, 128.9, 129.0, 129.1, 137.3, 142.4, 146.4, 159.0, 160.5, 163.0; HRMS (APCI+) Calcd. for C<sub>29</sub>H<sub>24</sub>FNO<sub>2</sub> (M): 437.1786; Found: 437.1797.

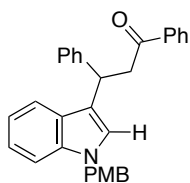

**3-(1-(4-Methoxybenzyl)-1*H*-indol-3-yl)-1,3-diphenylpropan-1-one (Table 2, entry 4):** Obtained in 83% yield as a white solid. 3-Substituted and 2,3-disubstituted product was not observed at all. Unsubstituted indole **2** was recovered in 5% (NMR). Deuterium incorporation was determined by using the same procedure, following by quenching with D<sub>2</sub>O and GC MS analysis by comparison

with the isotope pattern of the corresponding protio compound.  $^1\text{H}$  NMR (400 MHz,  $\text{CDCl}_3$ ):  $\delta$  3.71-3.79 (m, 2H), 3.76 (s, 3H), 5.05 (t,  $J=7.0$  Hz, 1H), 5.18 (s, 2H), 6.79 (d,  $J=8.7$  Hz, 2H), 6.91 (s, 1H), 6.96-7.00 (m, 3H), 7.08-7.16 (m, 2H), 7.19-7.27 (m, 3H), 7.34 (d,  $J=7.3$  Hz, 2H), 7.38-7.43 (m, 3H), 7.51 (t  $J=7.3$  Hz, 1H), 7.89 (d,  $J=7.8$  Hz, 2H)  $^{13}\text{C}$  NMR (100MHz,  $\text{CDCl}_3$ ):  $\delta$  38.2, 45.1, 49.3, 55.1, 109.6, 114.0 (2C), 118.2, 119.0, 119.6, 121.7, 125.4, 126.2, 127.2, 127.7 (2C), 127.9 (2C), 128.0 (2C), 128.3 (2C), 128.4 (2C), 129.5, 132.9, 136.8, 137.0, 144.2, 158.8, 198.5; HRMS (APCI+) Calcd. for  $\text{C}_{31}\text{H}_{27}\text{NO}_2$  (M): 445.2036; Found: 445.2038.

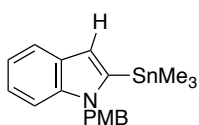

**1-(4-Methoxybenzyl)-2-(trimethylstannyl)-1H-indole (Table 2, entry 5):** After the cyclization reaction, trimethyltin chloride in THF (1 mol/L, 0.24 mL, 0.24 mmol) was added and the reaction mixture was stirred at room temperature. The title compound was obtained in 55% yield as a yellow oil after purification by GPC using chloroform as an eluent. 3-Substituted and 2,3-disubstituted product was not observed at all. Unsubstituted indole **2** was recovered in 40% (NMR). Deuterium incorporation was determined by using the same procedure, following by quenching with  $\text{D}_2\text{O}$  and GC MS analysis by comparison with the isotope pattern of the corresponding protio compound.  $^1\text{H}$  NMR (400 MHz,  $\text{CDCl}_3$ ):  $\delta$  0.23 (s, 9H), 3.73 (s, 3H), 5.34 (s, 2H), 6.69 (s, 1 H), 6.77 (d,  $J=8.9$  Hz, 2H), 6.84 (d,  $J=8.7$  Hz, 2H), 7.04-7.12 (m, 2H), 7.19 (m, 1H), 7.61 (m, 1H)  $^{13}\text{C}$  NMR (100MHz,  $\text{CDCl}_3$ ):  $\delta$  -8.7 (3C), 50.3, 55.2, 109.45, 111.9, 114.1 (2C), 119.1, 120.0, 121.4, 127.0 (2C), 129.1, 130.3, 139.5, 142.5, 158.8; HRMS (APCI+) Calcd. for  $\text{C}_{19}\text{H}_{23}\text{NOSn}$  (M): 401.0796; Found: 401.0798. The regiochemistry of the compound was determined by NOE experiments in  $\text{CDCl}_3$ . When signal Ha at  $\delta=5.34$  (s, 2H) was irradiated, Hb at  $\delta=0.23$  (s, 9H) exhibited an enhancement by 7.4%, Hc at  $\delta=6.84$  (d,  $J=8.7$  Hz, 2H) exhibited an enhancement by 9.4%, and Hd at  $\delta=7.19$  (m, 1H) exhibited an enhancement by 11%.

```

DFILE      E:\NMRデータ\#5\#m
COMNT      DPGFSQ NOE 1d
DATIM      12-02-2016 07:28:12
OBNUC      1H
EXMOD      noe_1d_dpgfsq.ex
FREQ      399.78 MHz
OBSET      4.33 KHz
OBFIN      7.71 Hz
POINT      26214
FREQ      6002.31 Hz
SCANS      3600
ACQTM      2.1837 sec
PD          7.0000 sec
PW1         11.00 usec
IRNUC      1H
CTEMP      19.4 c
SLVNT      CDCl3
XREF      5.34 ppm
BF          0.60 Hz
RGAIN      44

```

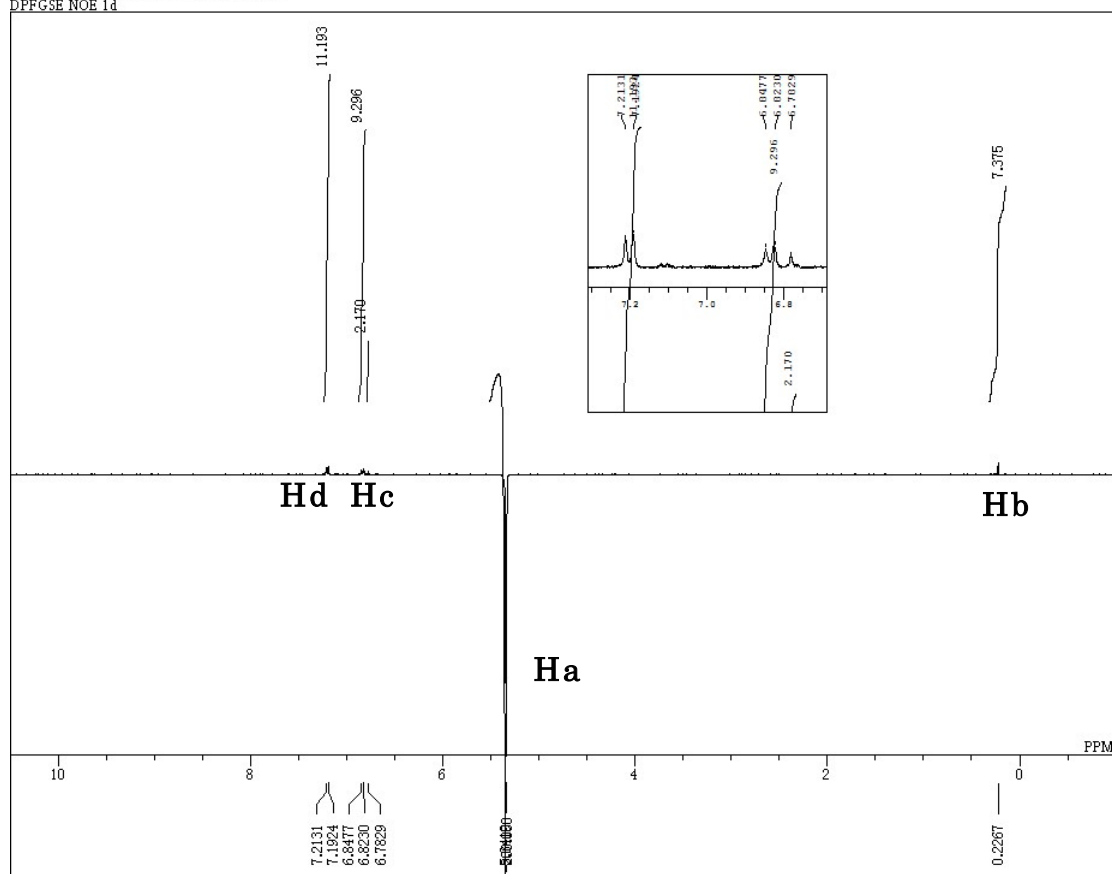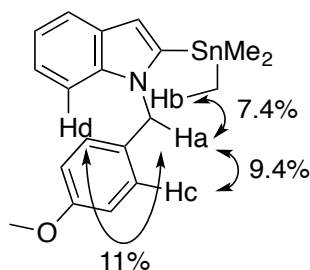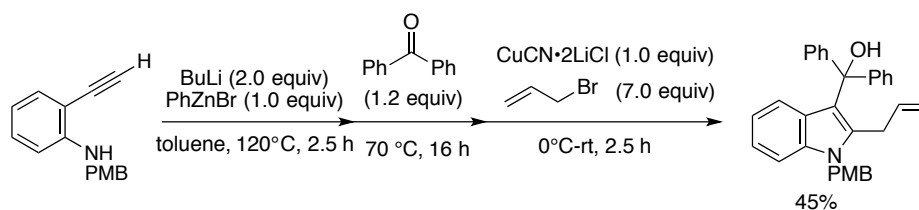

**(1-(4-Methoxybenzyl)(2-allyl)-1*H*-indol-3-yl)diphenylmethanol** (Table 2, entry 6): In an oven-dried Schlenk tube, 2-ethynyl-*N*-(4-methoxybenzyl)aniline **1** (95 mg, 0.40 mmol) was dissolved in Et<sub>2</sub>O (0.8 mL), and BuLi in hexane (1.59 mol/L, 0.52 mL, 0.82 mmol) was added at 0 °C. A solution of PhZnBr in THF (0.43 mol/L, 0.93 mL, 0.40 mmol) was added. After the heating

the mixture to room temperature, volatiles were removed in *vacuo*, and then toluene (0.8 mL) was added. The resulting mixture was stirred at 120 °C for 2.5 h, which afforded a gray suspension product. After cooling the reaction mixture at room temperature, benzophenone (88 mg, 0.48 mmol) was added. The reaction mixture was stirred at 70 °C for 16 h. After cooling the reaction mixture at 0 °C, CuCN•2LiCl in THF (1 mol/L, 0.40 mL, 0.40 mmol), then allyl bromide (0.24 mL, 0.34 g, 2.8 mmol) were sequentially added. The reaction mixture was stirred at room temperature for 2.5 h, and was quenched with aq. NH<sub>4</sub>Cl. The reaction mixture was extracted with ethyl acetate (5×2 mL), and the solvent was removed in *vacuo*. The product was purified by silica gel column chromatography (eluent: 15% ethyl acetate and 1% triethylamine in hexane) to give the title compound (82 mg, 45%) as an orange oil. Other byproducts detected were monoallylindole (38%), diallylindole (6%), and a trace amount of (indol-3-yl)diphenylmethanol. <sup>1</sup>H NMR (400 MHz, CDCl<sub>3</sub>): δ 3.03 (s, 1H), 3.13-3.14 (m, 2 H), 3.75 (s, 3H), 4.80 (dd, *J* = 17 Hz, 1.5 Hz, 1H), 4.97 (dd, *J* = 17 Hz, 1.5 Hz, 1H), 5.24 (s, 2H), 5.70 (m, 1 H), 6.42 (d, *J* = 8.2 Hz, 1H), 6.77-6.85 (m, 5 H), 7.03 (m, 1H), 7.20 (d, *J* = 8.2 Hz, 1H), 7.27-7.40 (m, 10H); <sup>13</sup>C NMR(100MHz,CDCl<sub>3</sub>):δ 29.7, 45.7, 55.2, 79.6, 109.3, 114.1 (2C), 115.7, 118.1, 119.4, 121.1, 126.5, 126.9 (2C), 127.1 (2C), 127.6 (4C), 127.7 (4C), 127.9, 128.5, 129.7, 136.2, 136.6, 147.2 (2C), 158.7 ; HRMS (APCI+) Calcd. for C<sub>32</sub>H<sub>29</sub>NO<sub>2</sub> (M): 459.2193; Found: 459.216

## 12. $^1\text{H}$ , $^2\text{D}$ , $^{13}\text{C}$ NMR and NOE Spectra

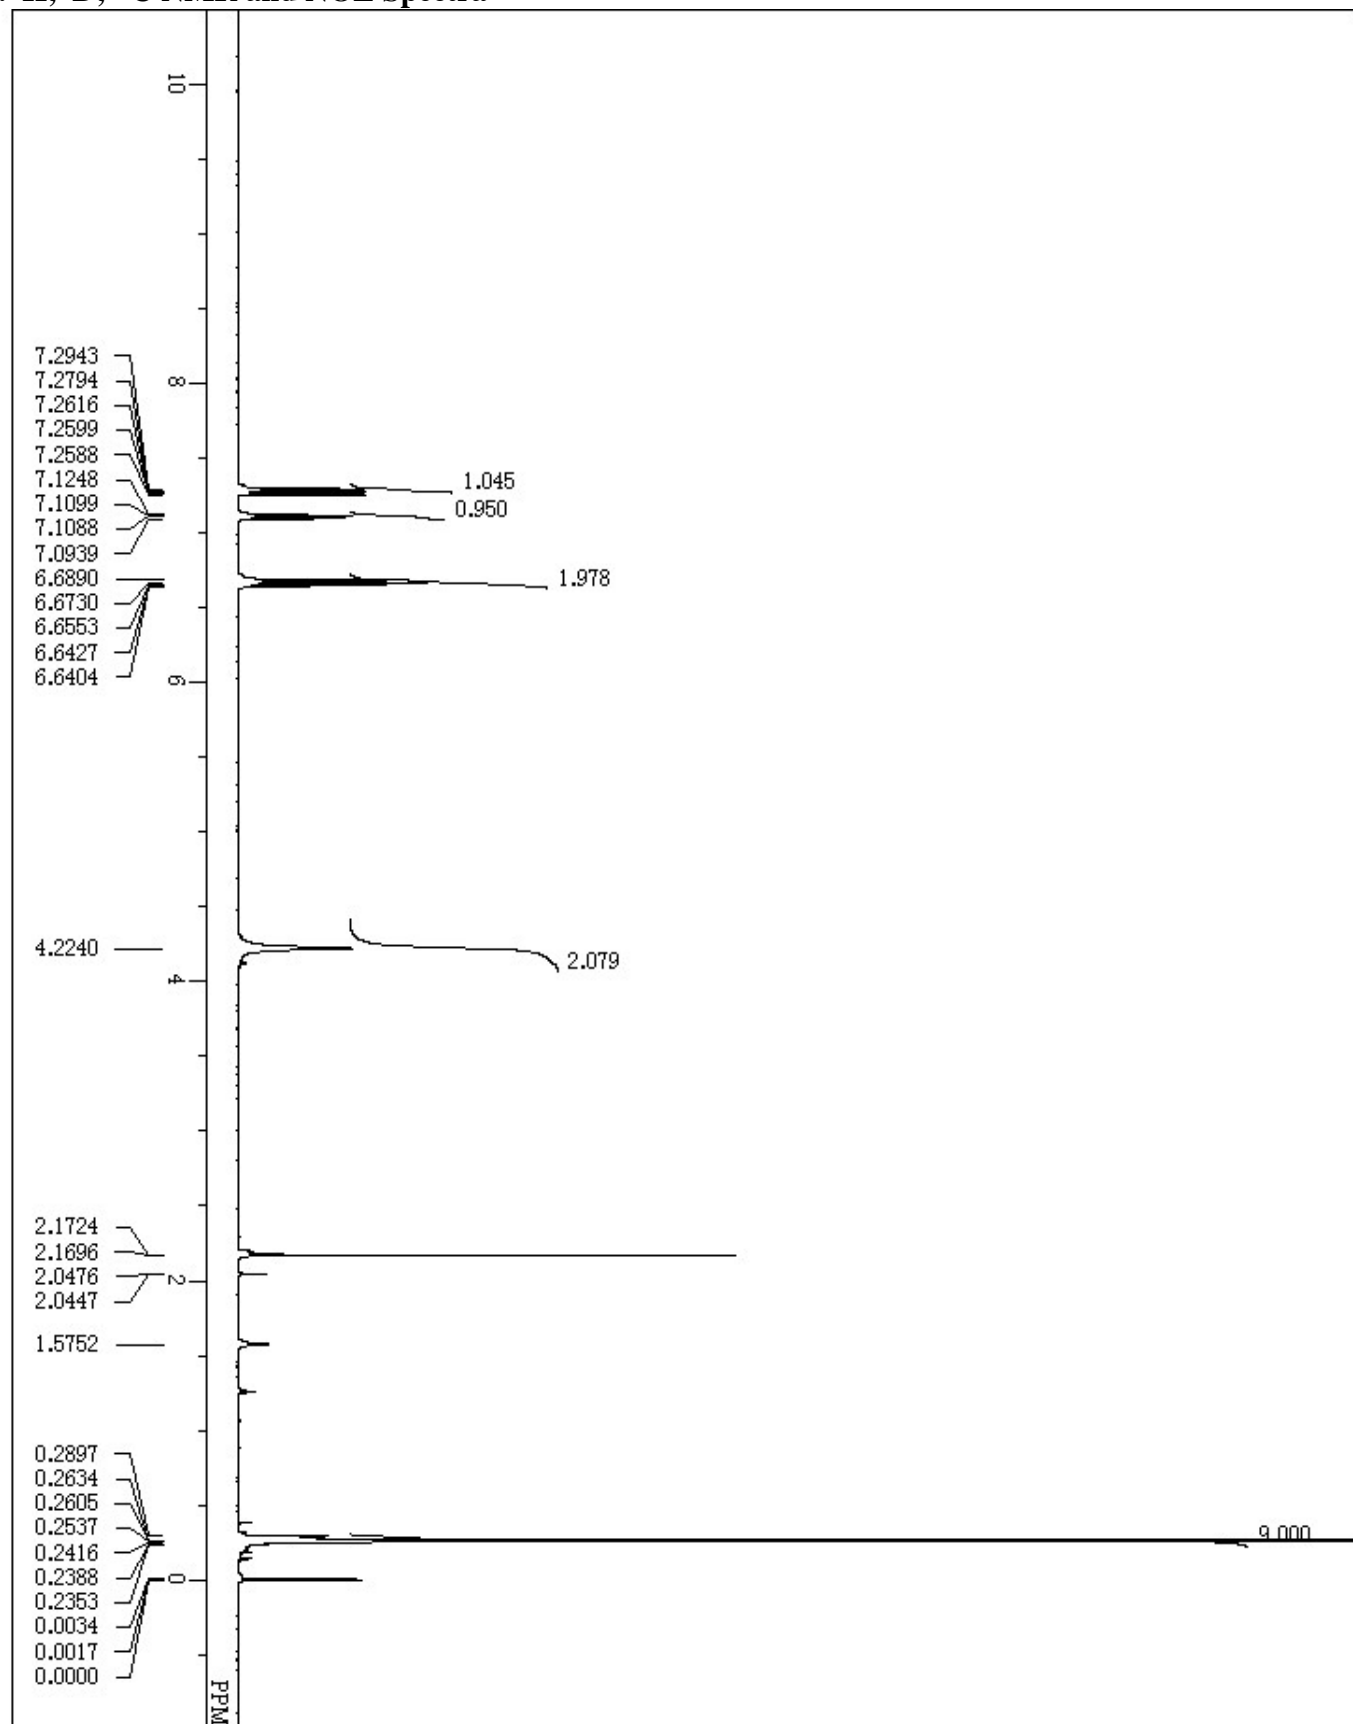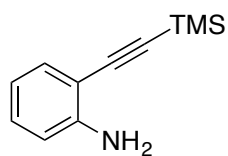

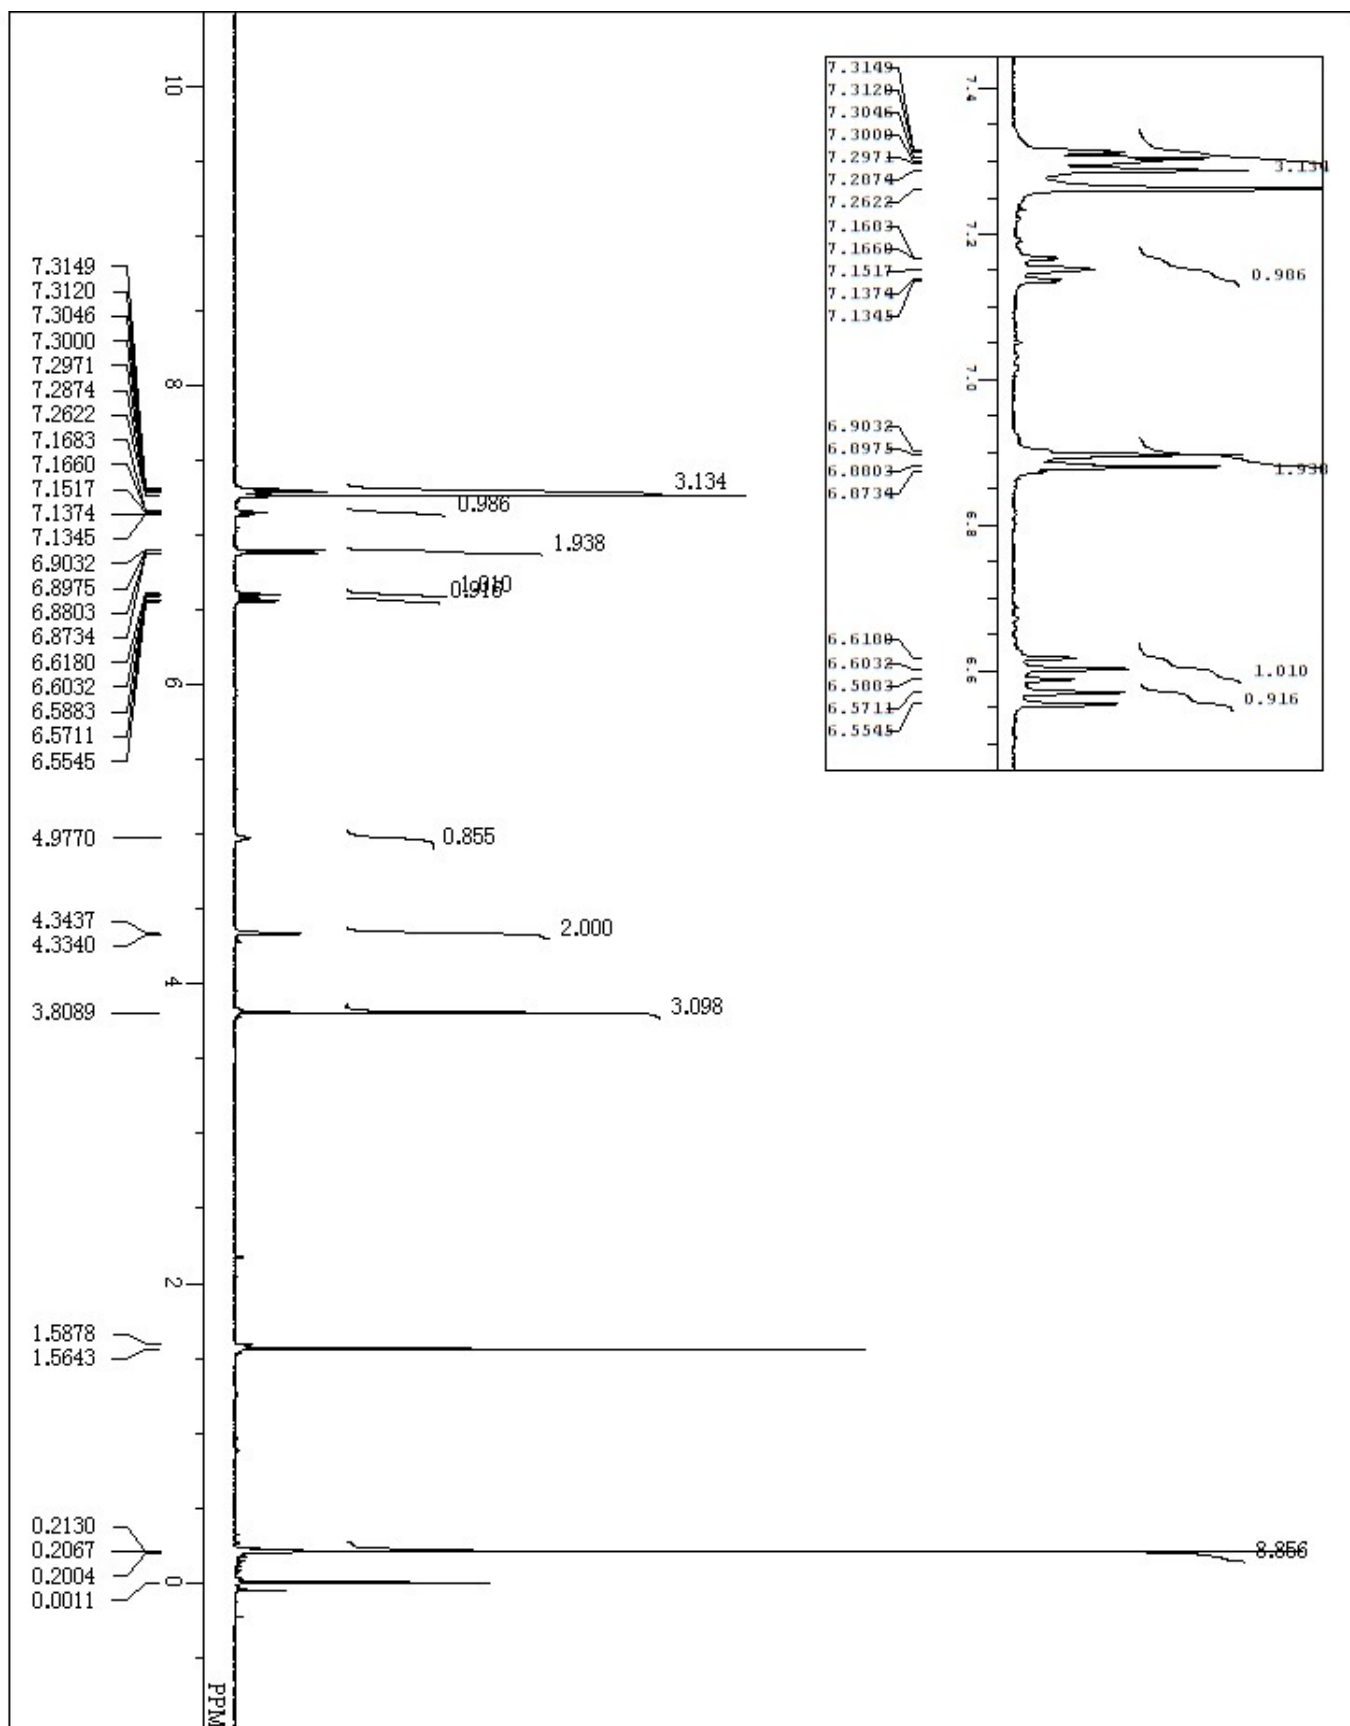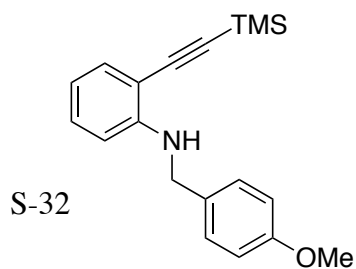



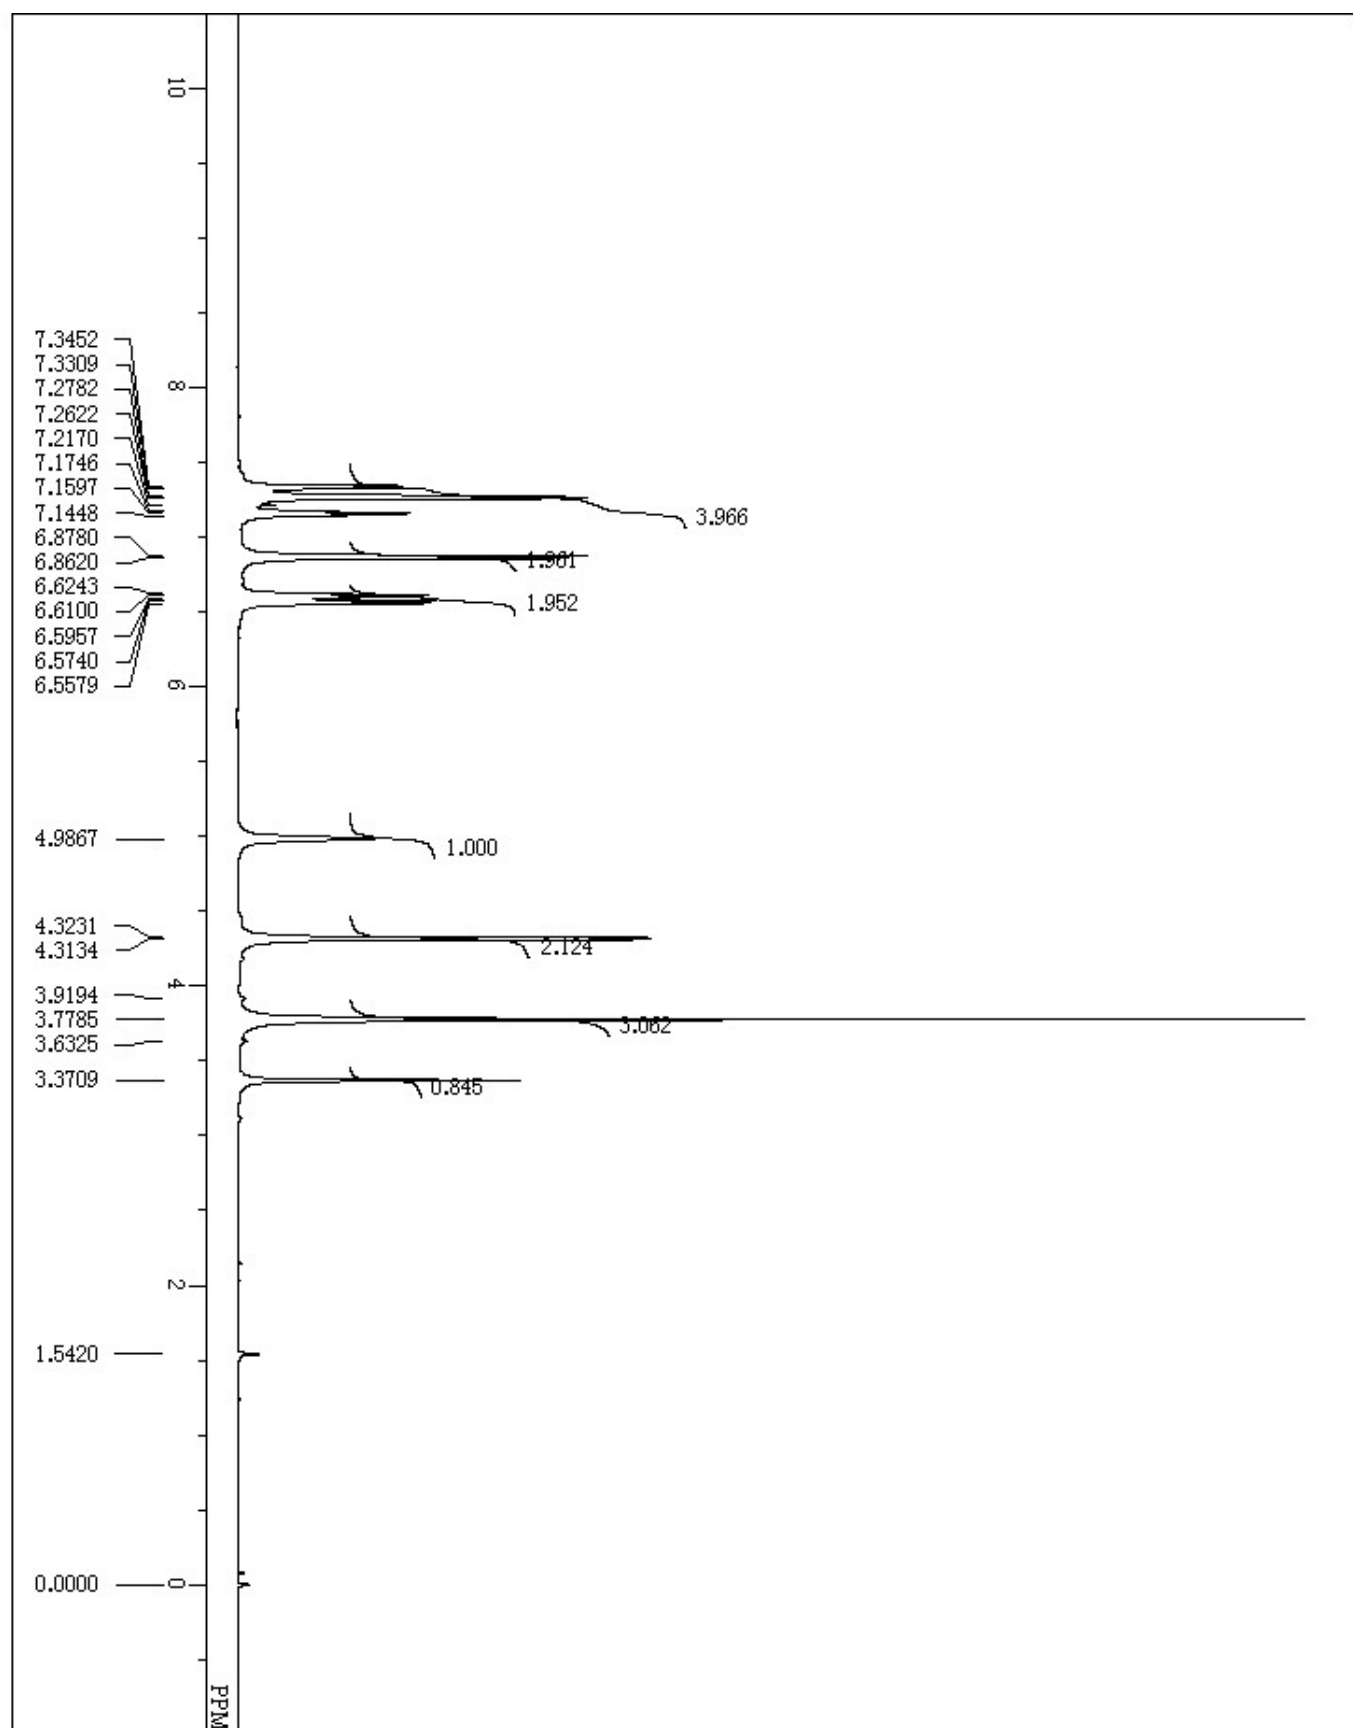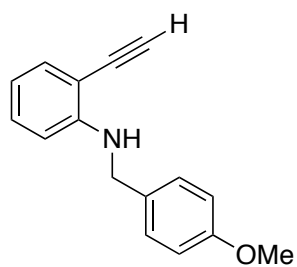

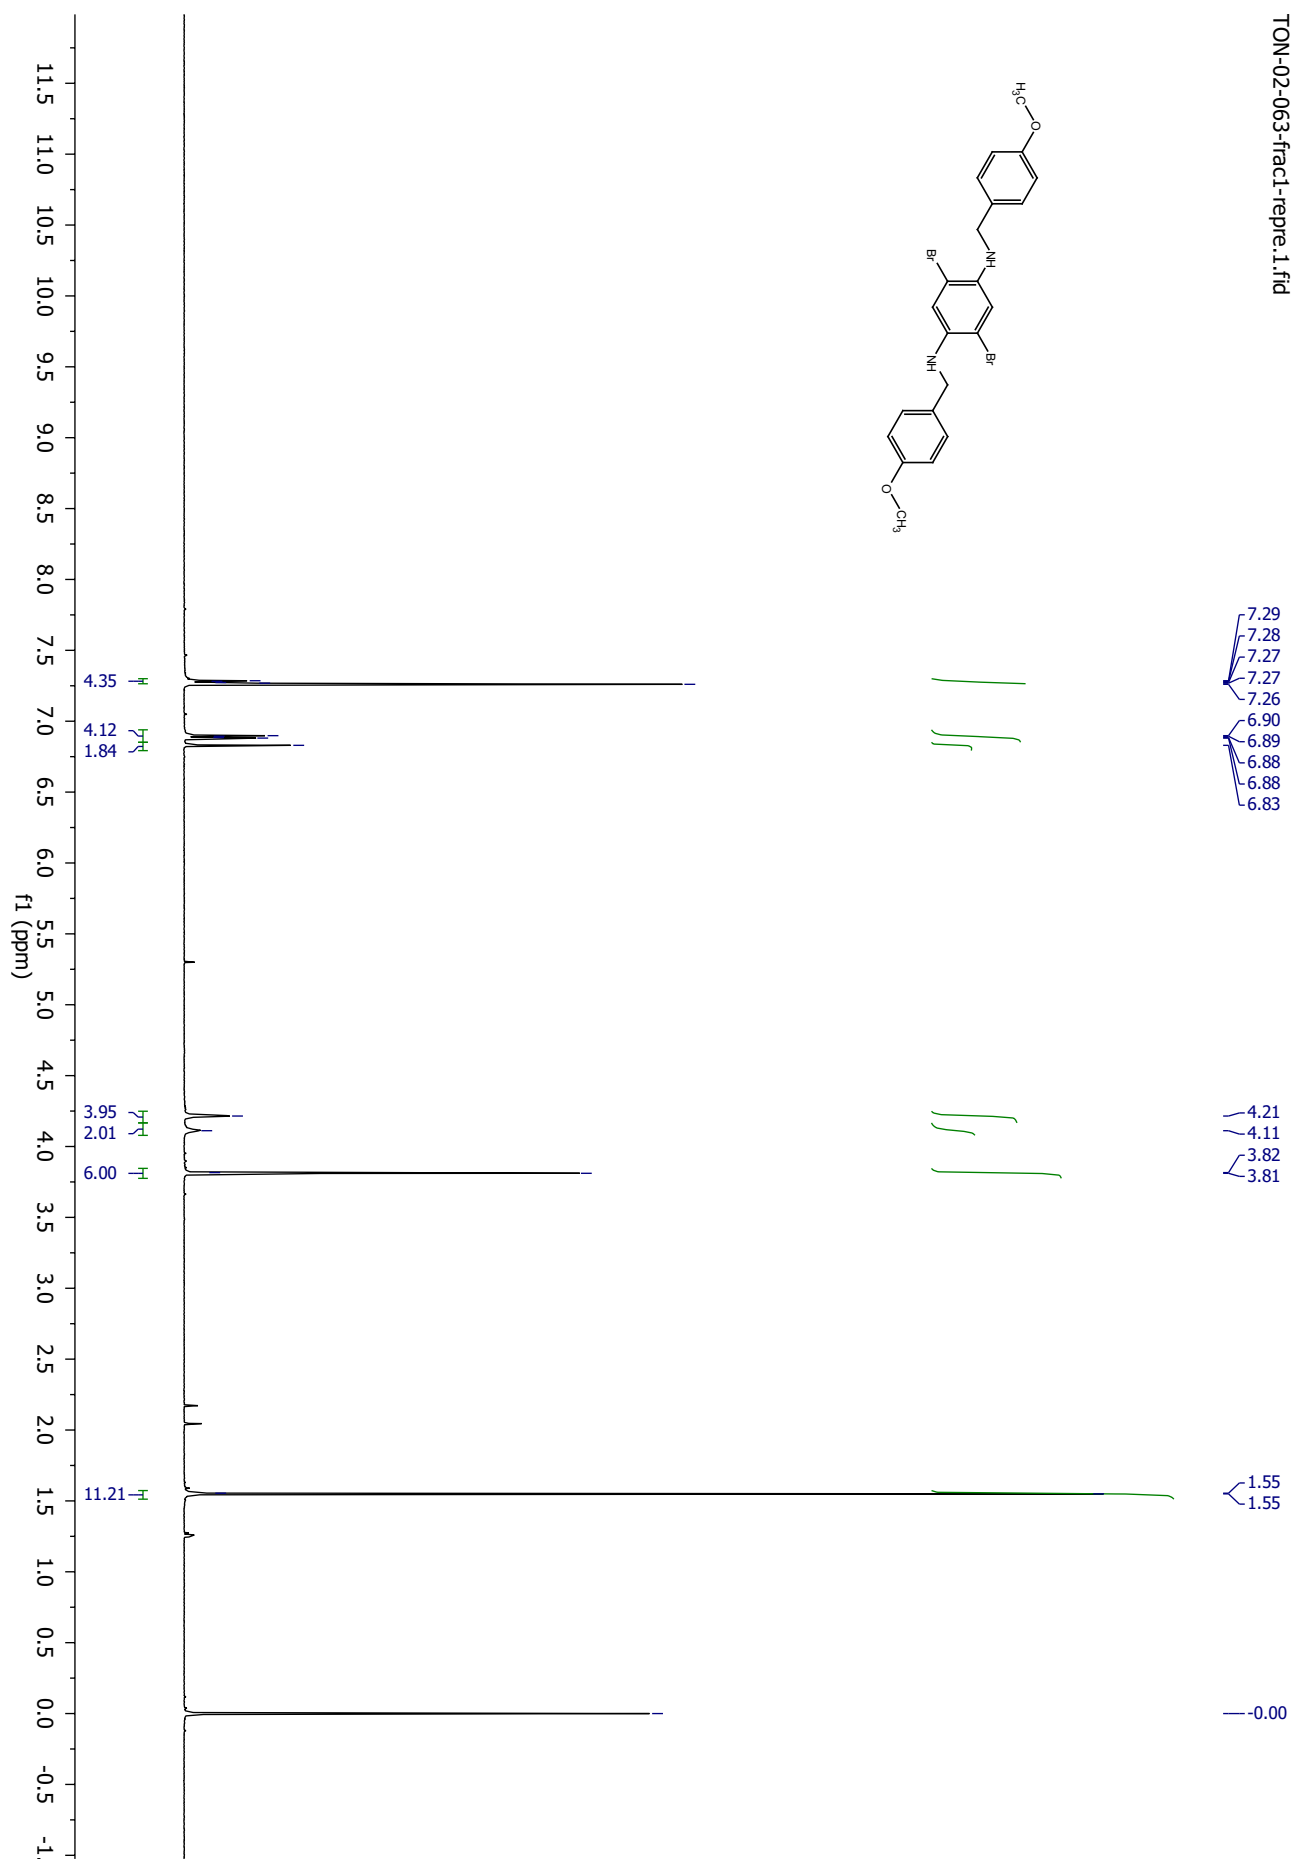

TON-02-066-frac2.1.fid

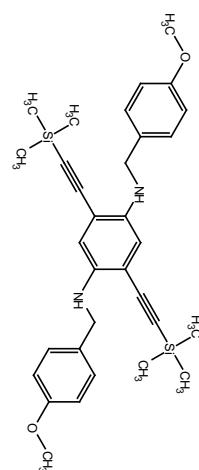

7.30  
7.28  
7.28  
7.26  
7.25  
6.89  
6.89  
6.88  
6.87

4.25

3.81

1.55

0.19  
0.19  
0.18  
0.17  
-0.00

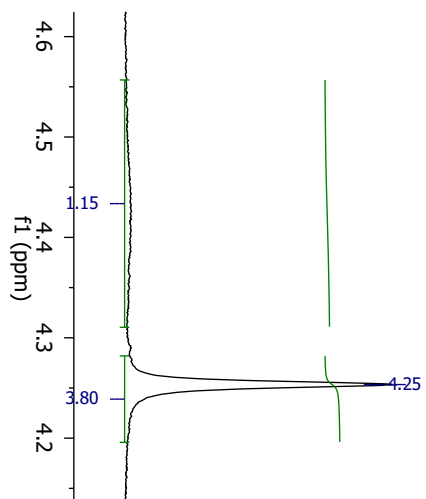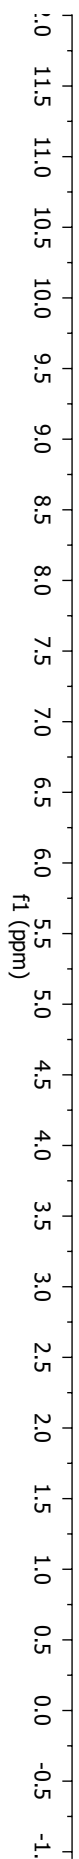

S#618562  
single\_pulse

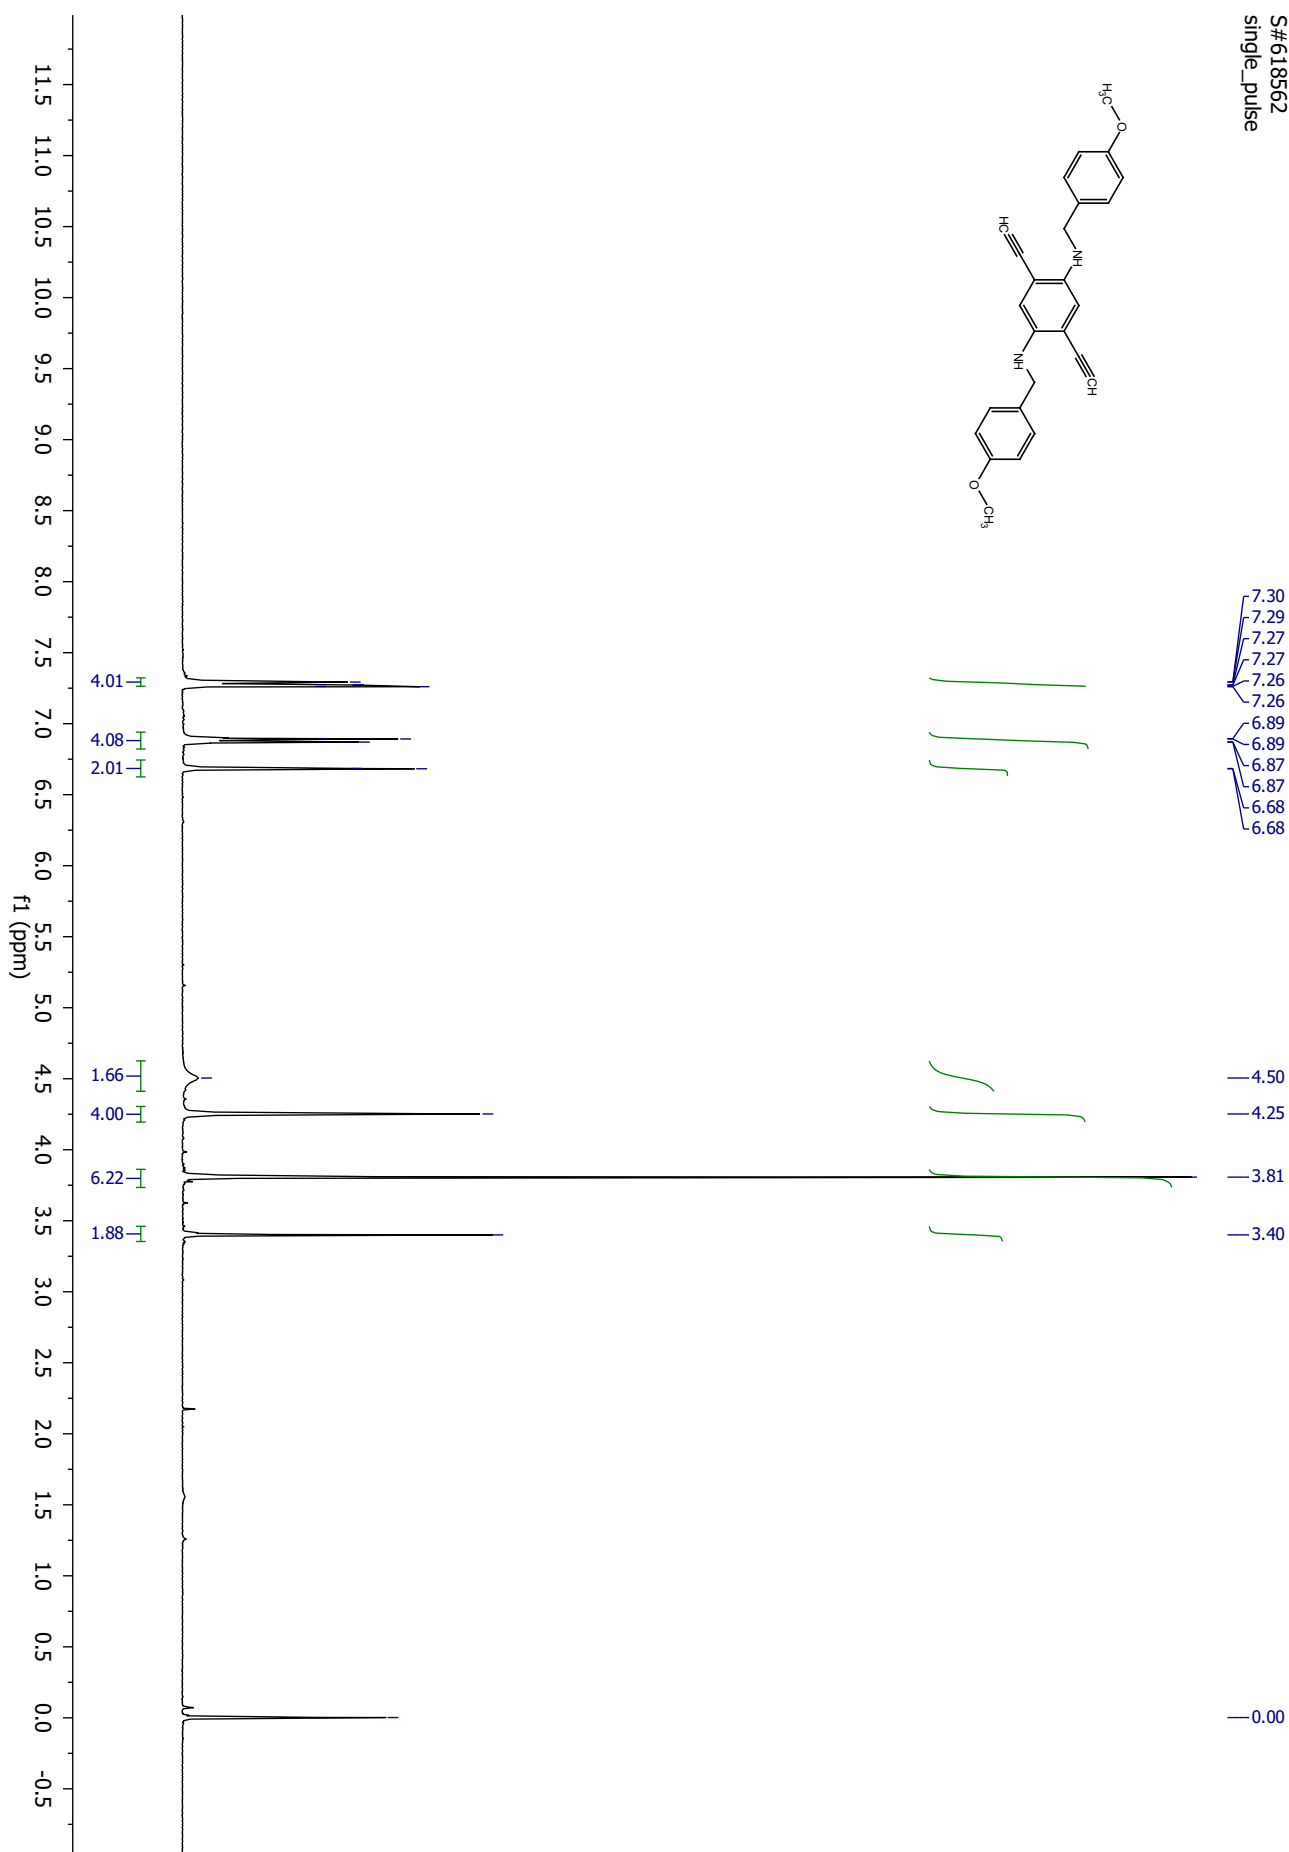

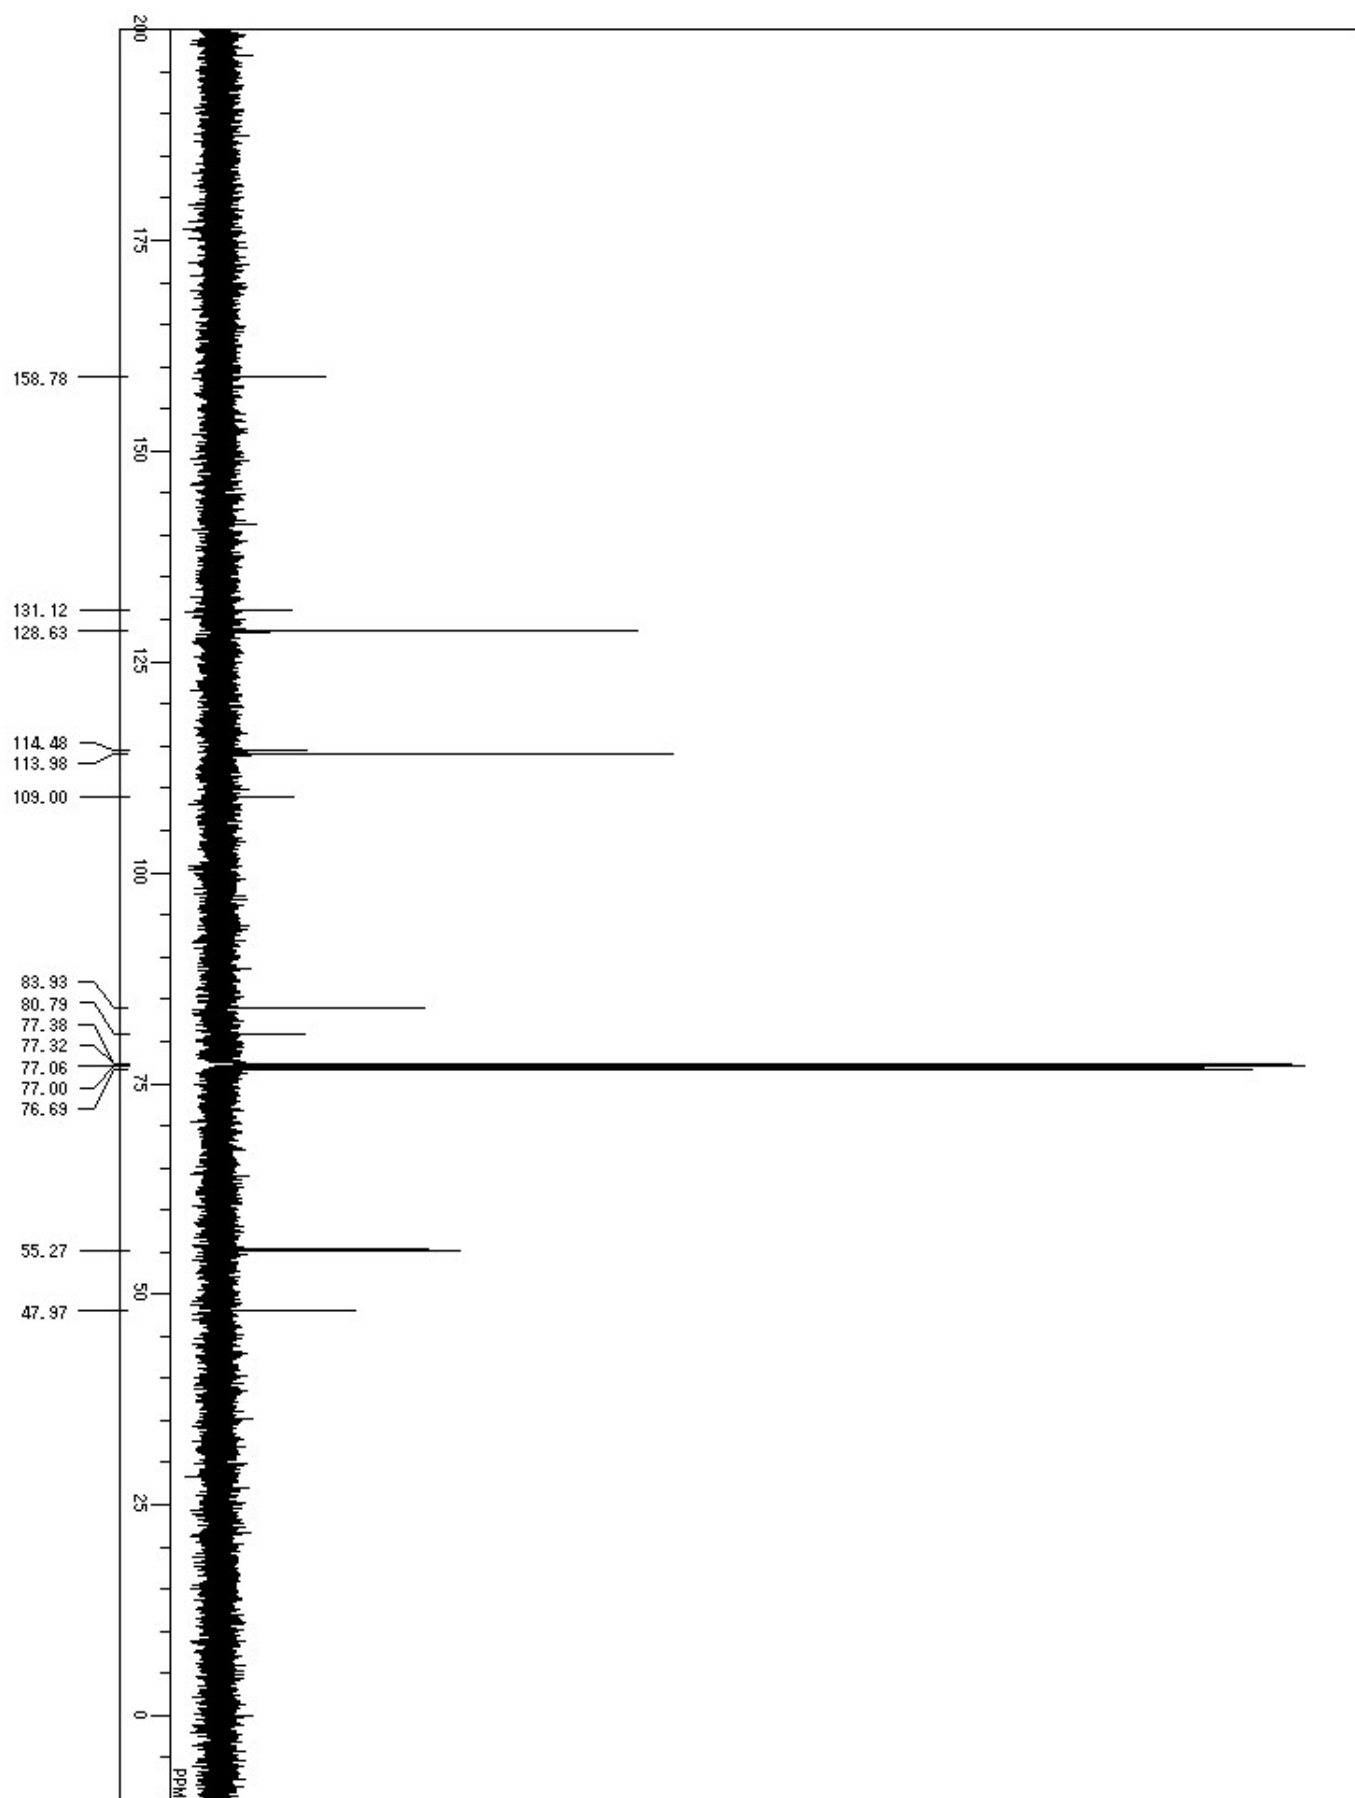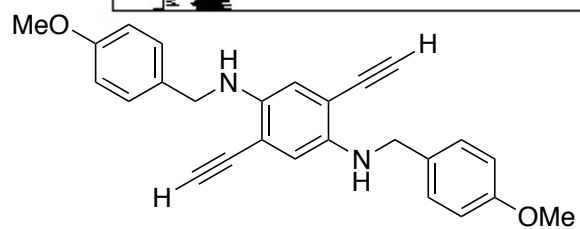

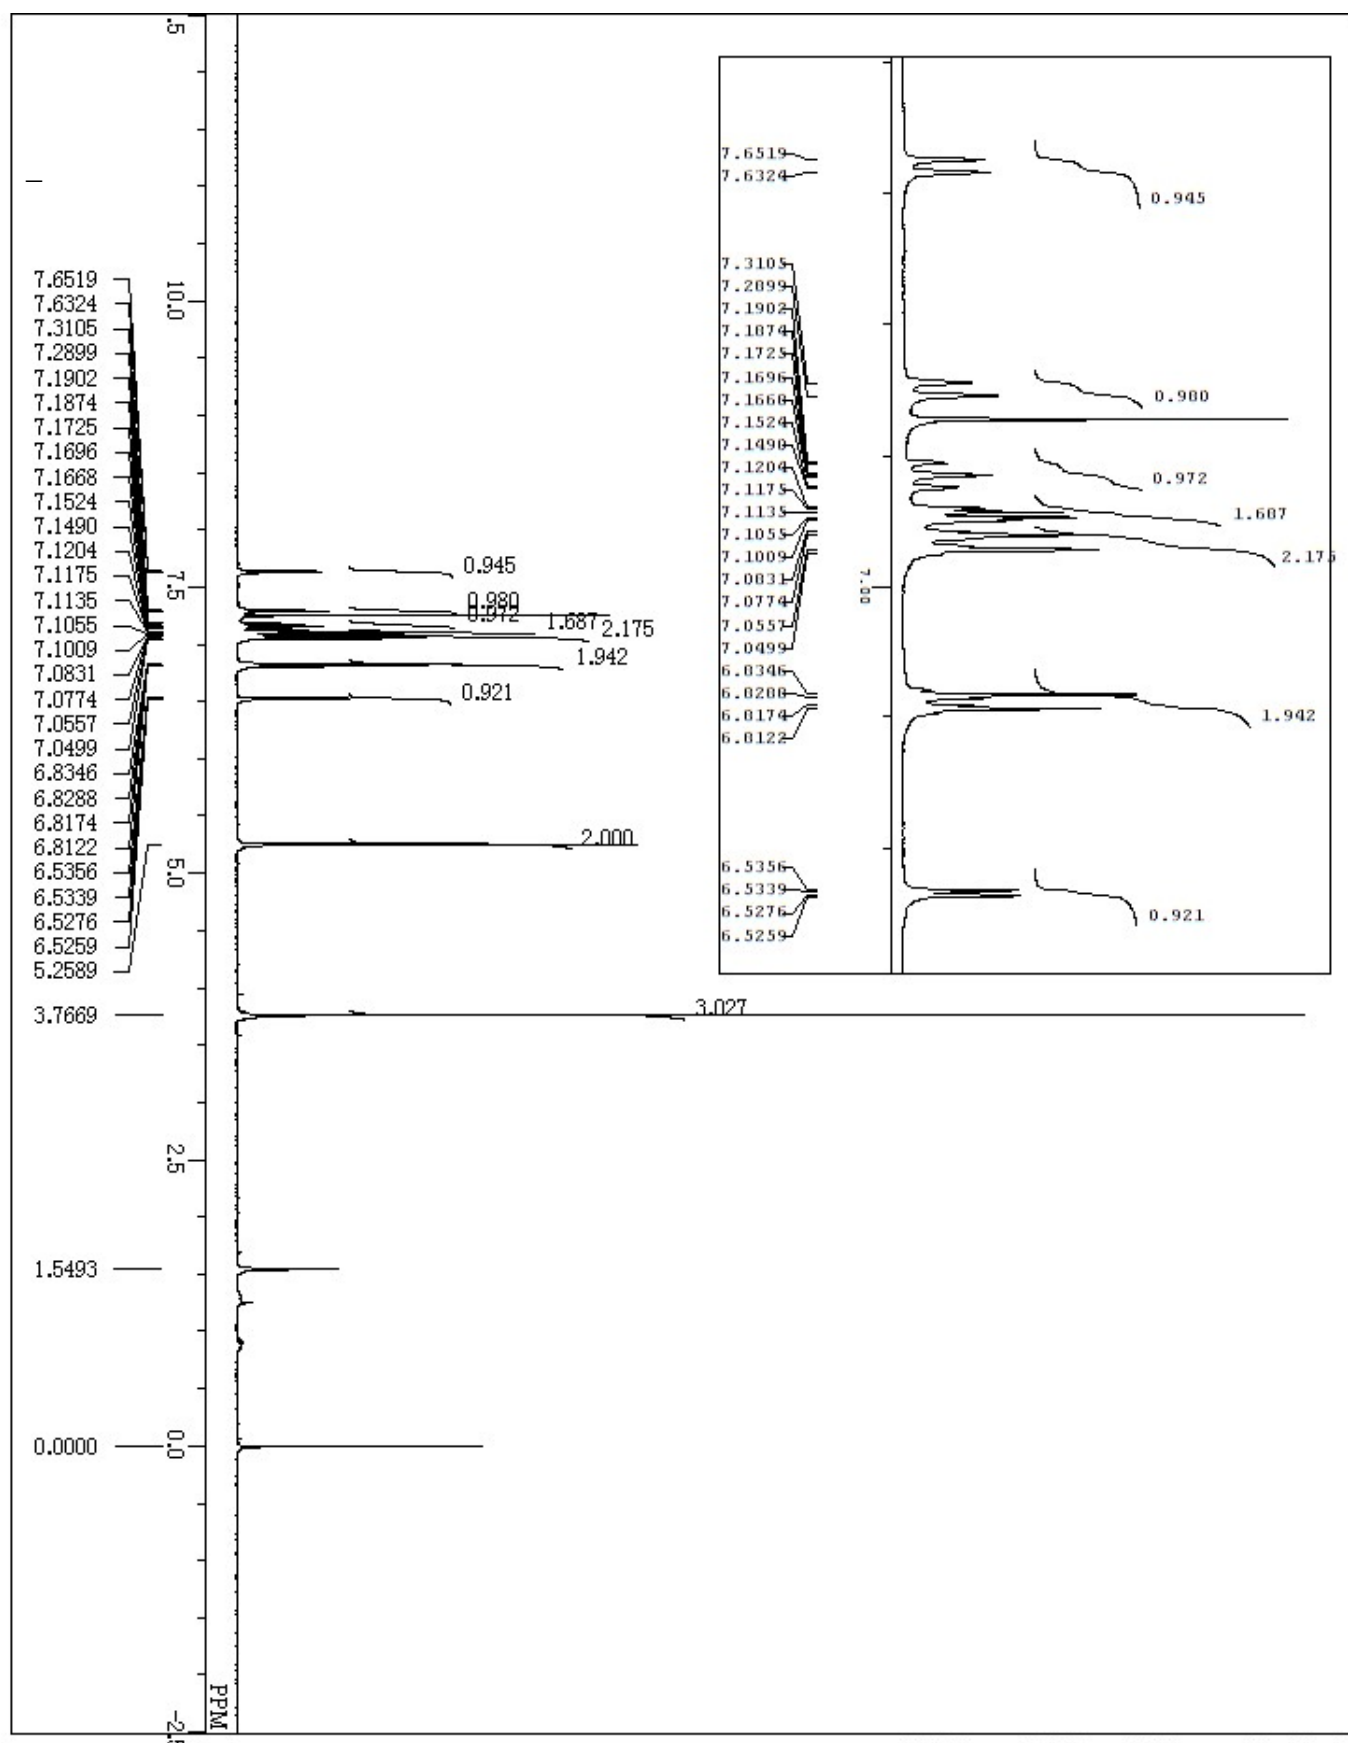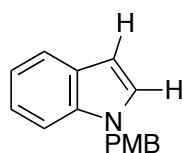

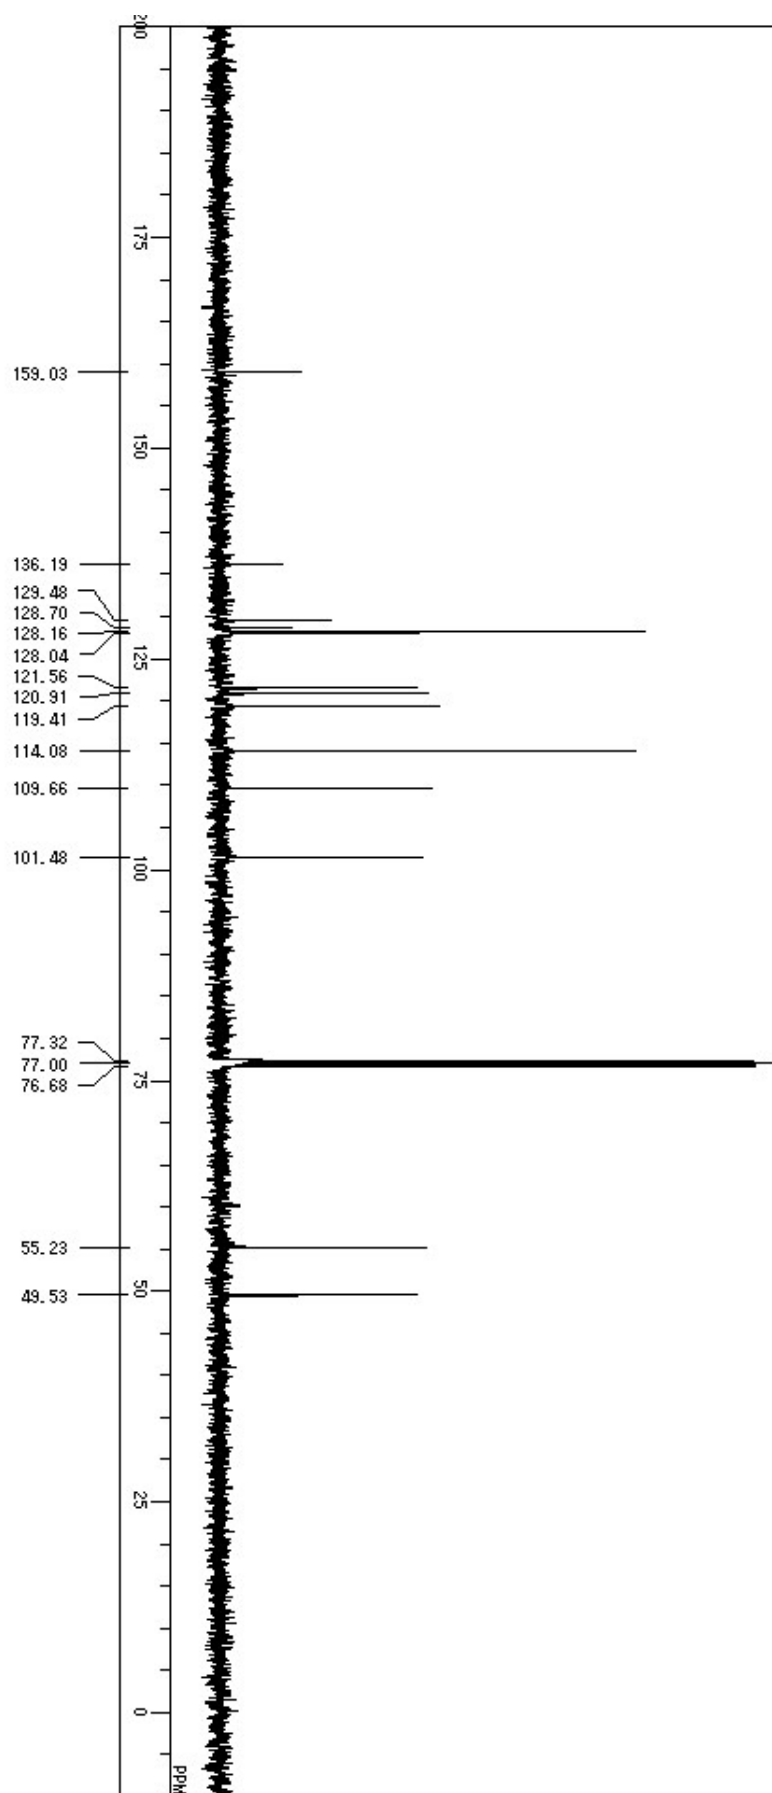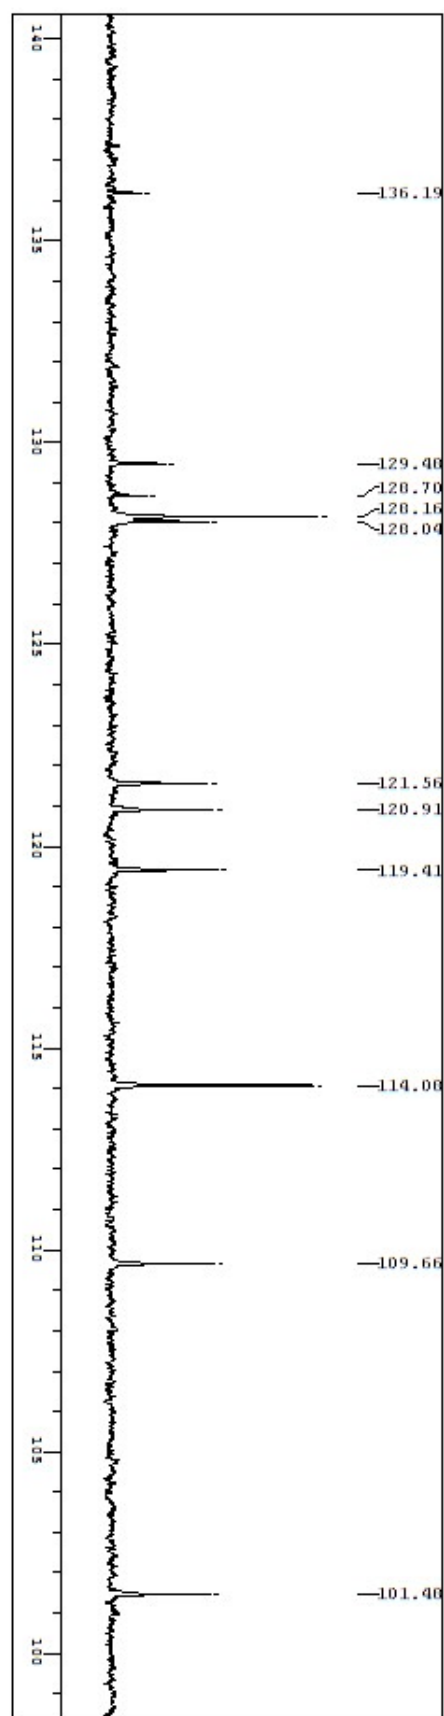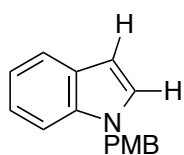

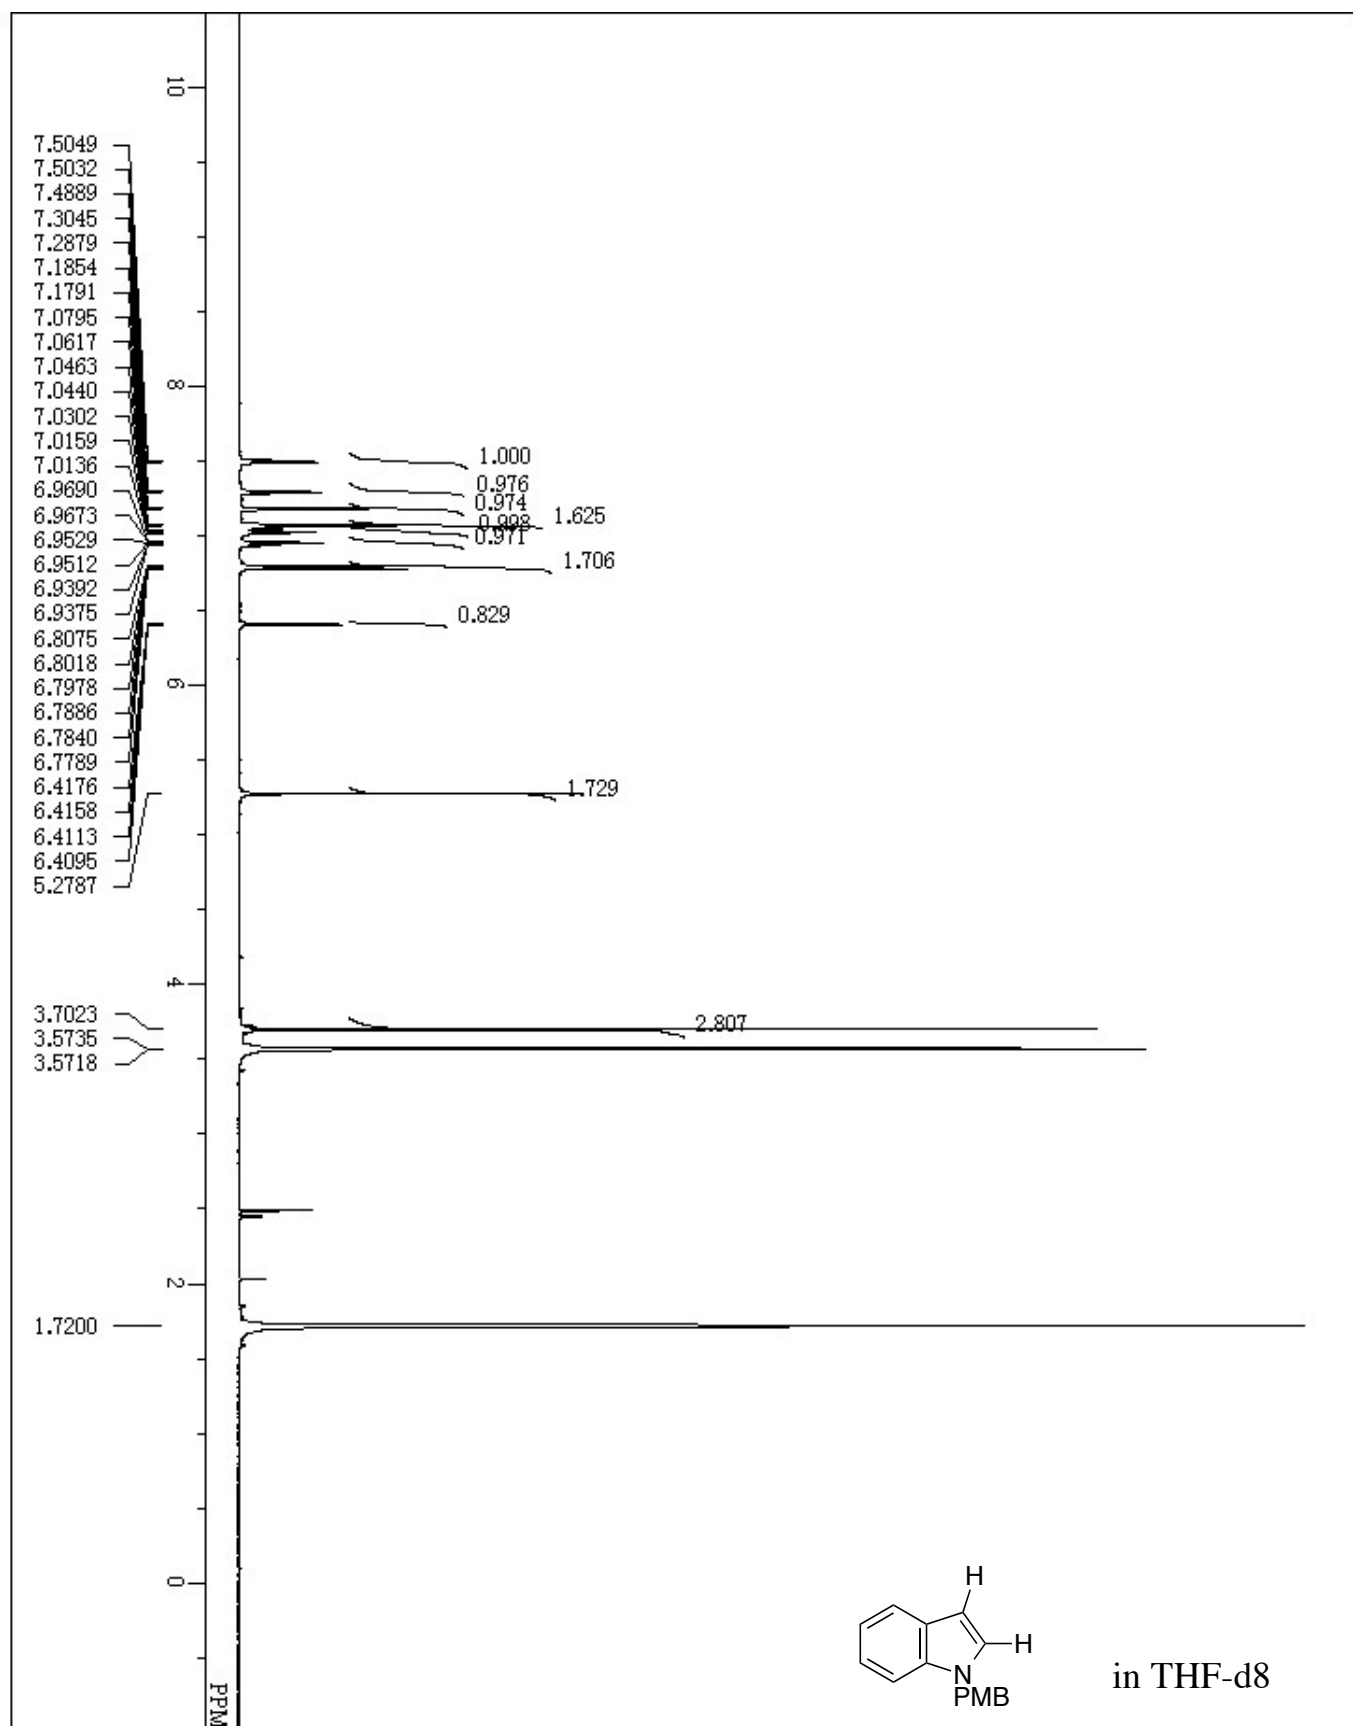



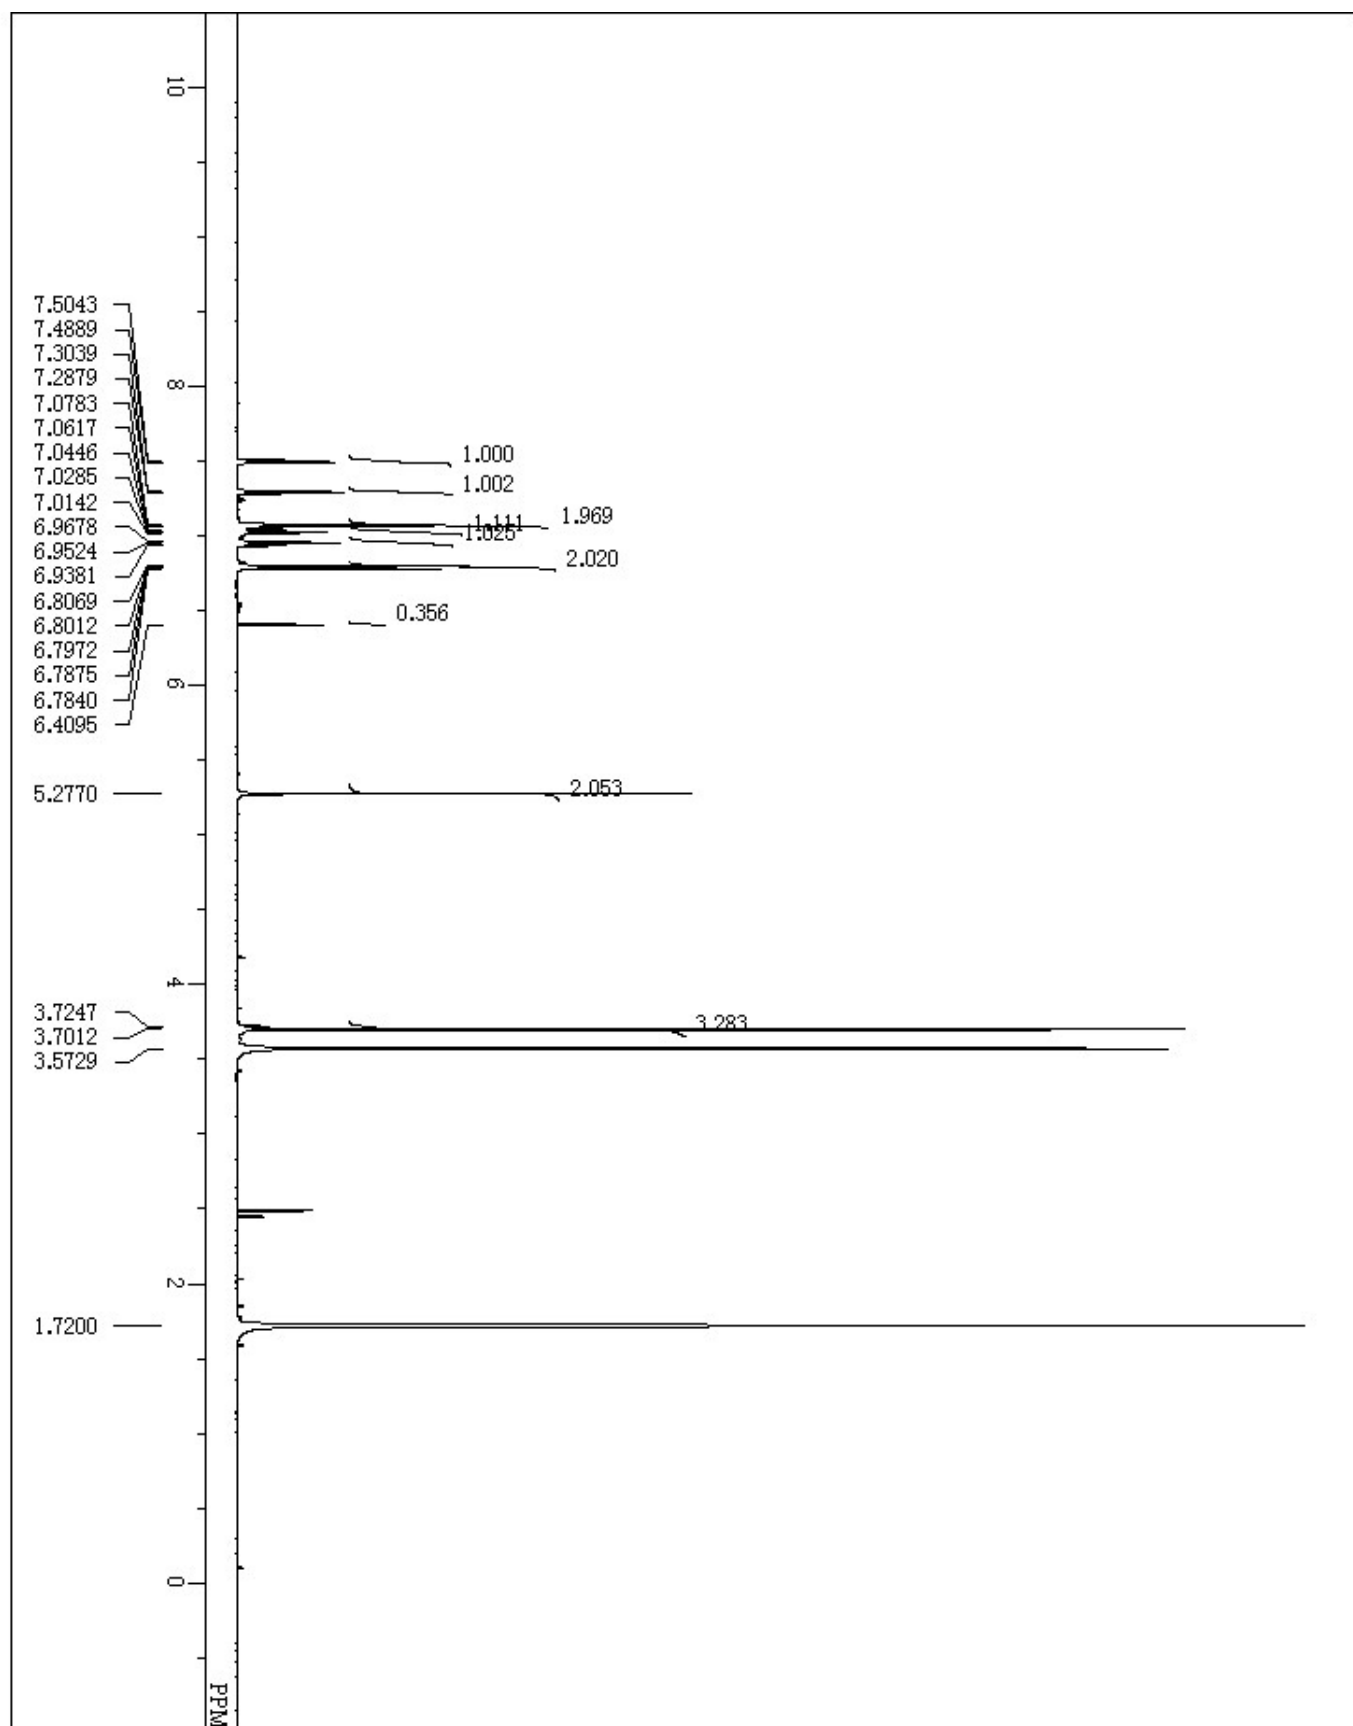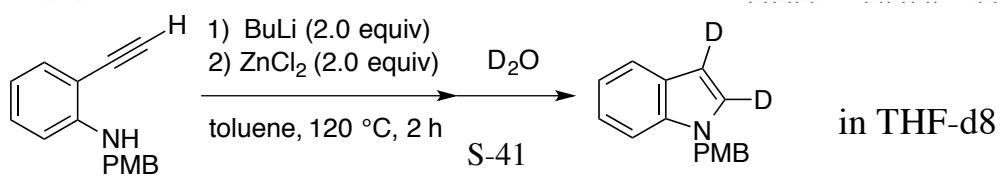

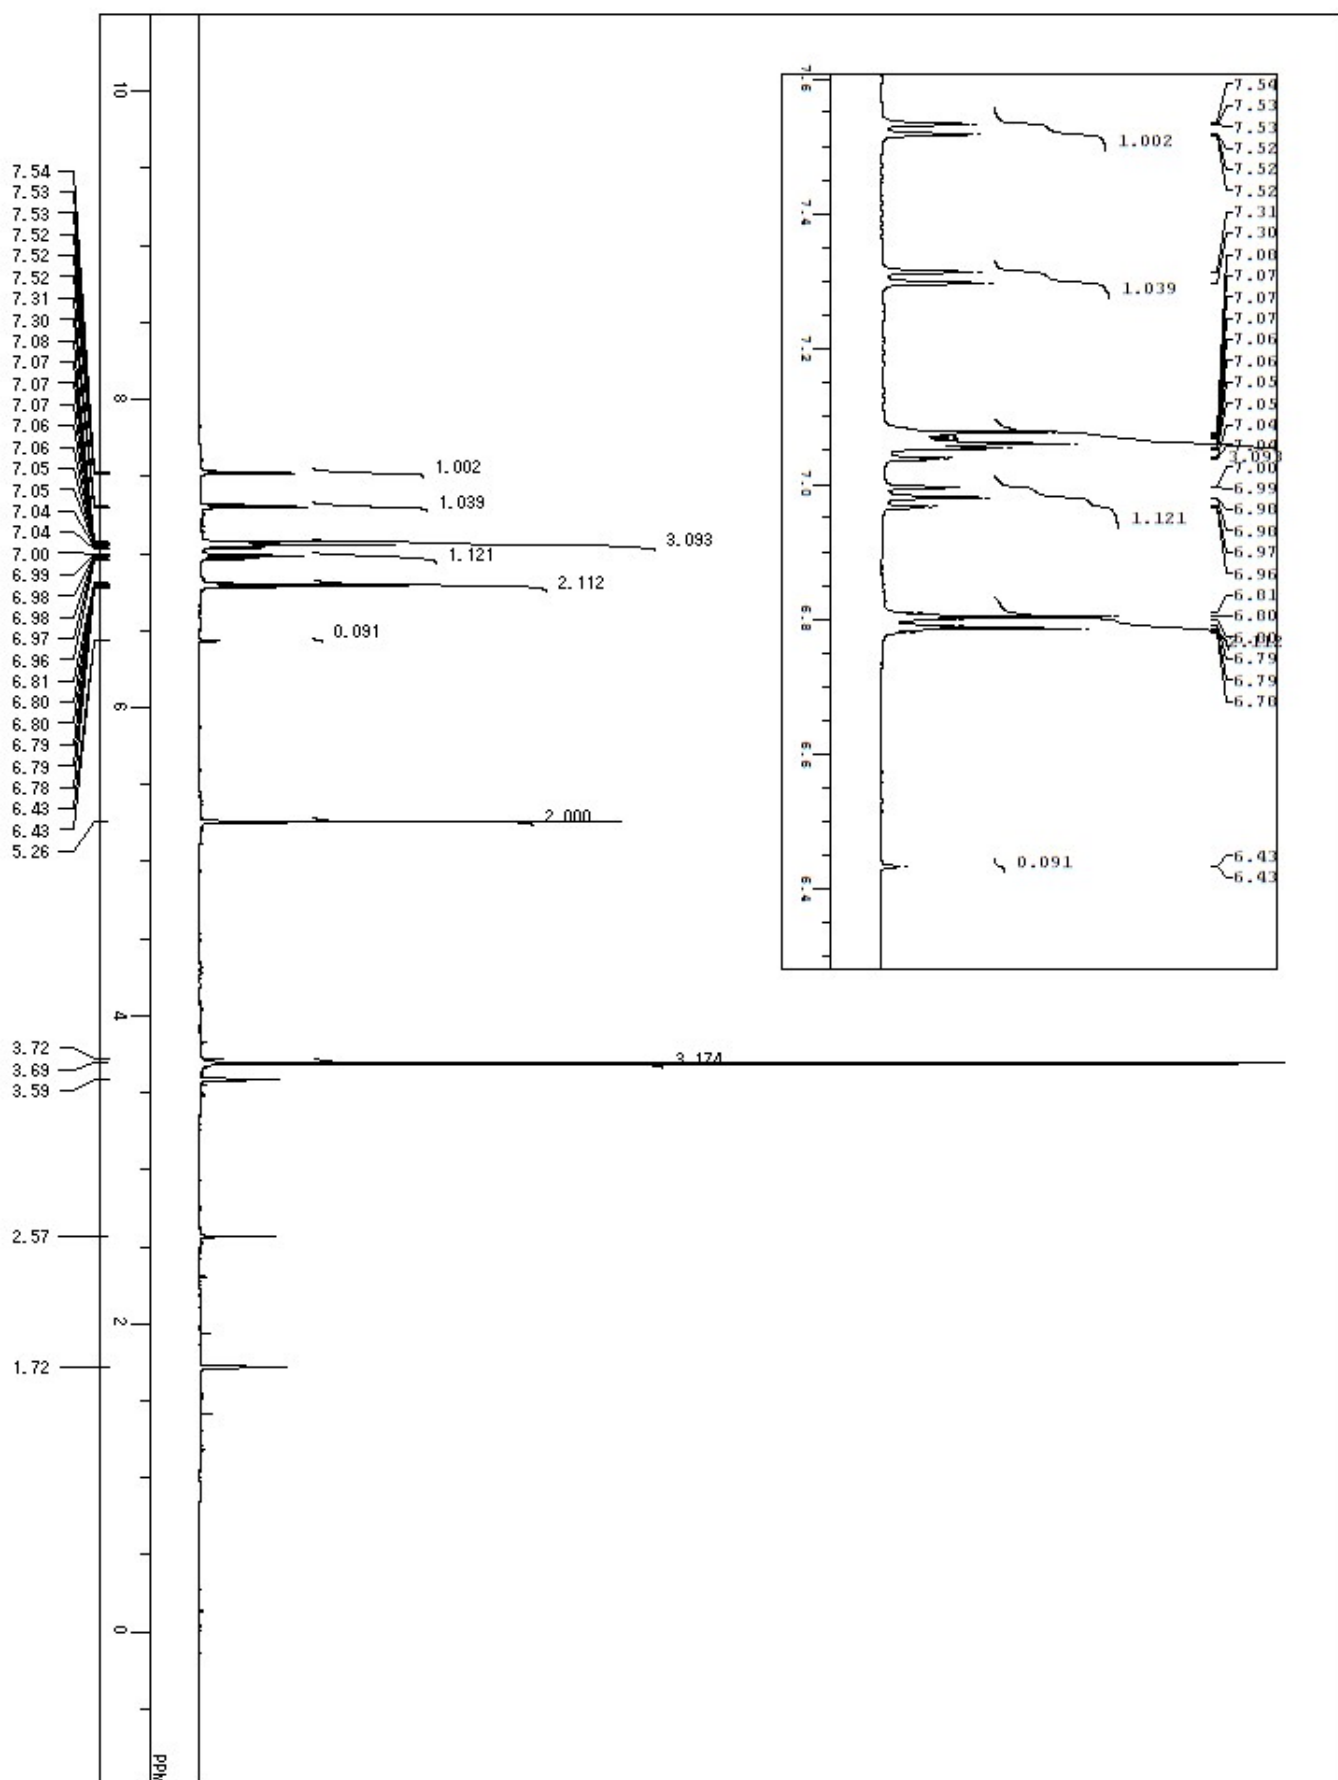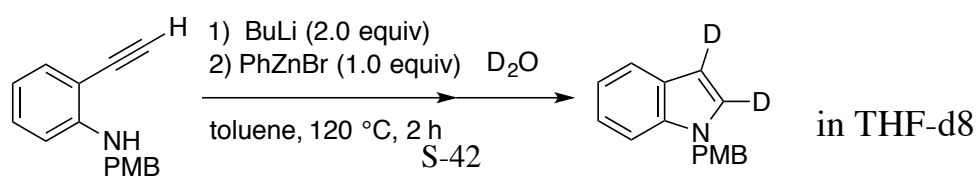

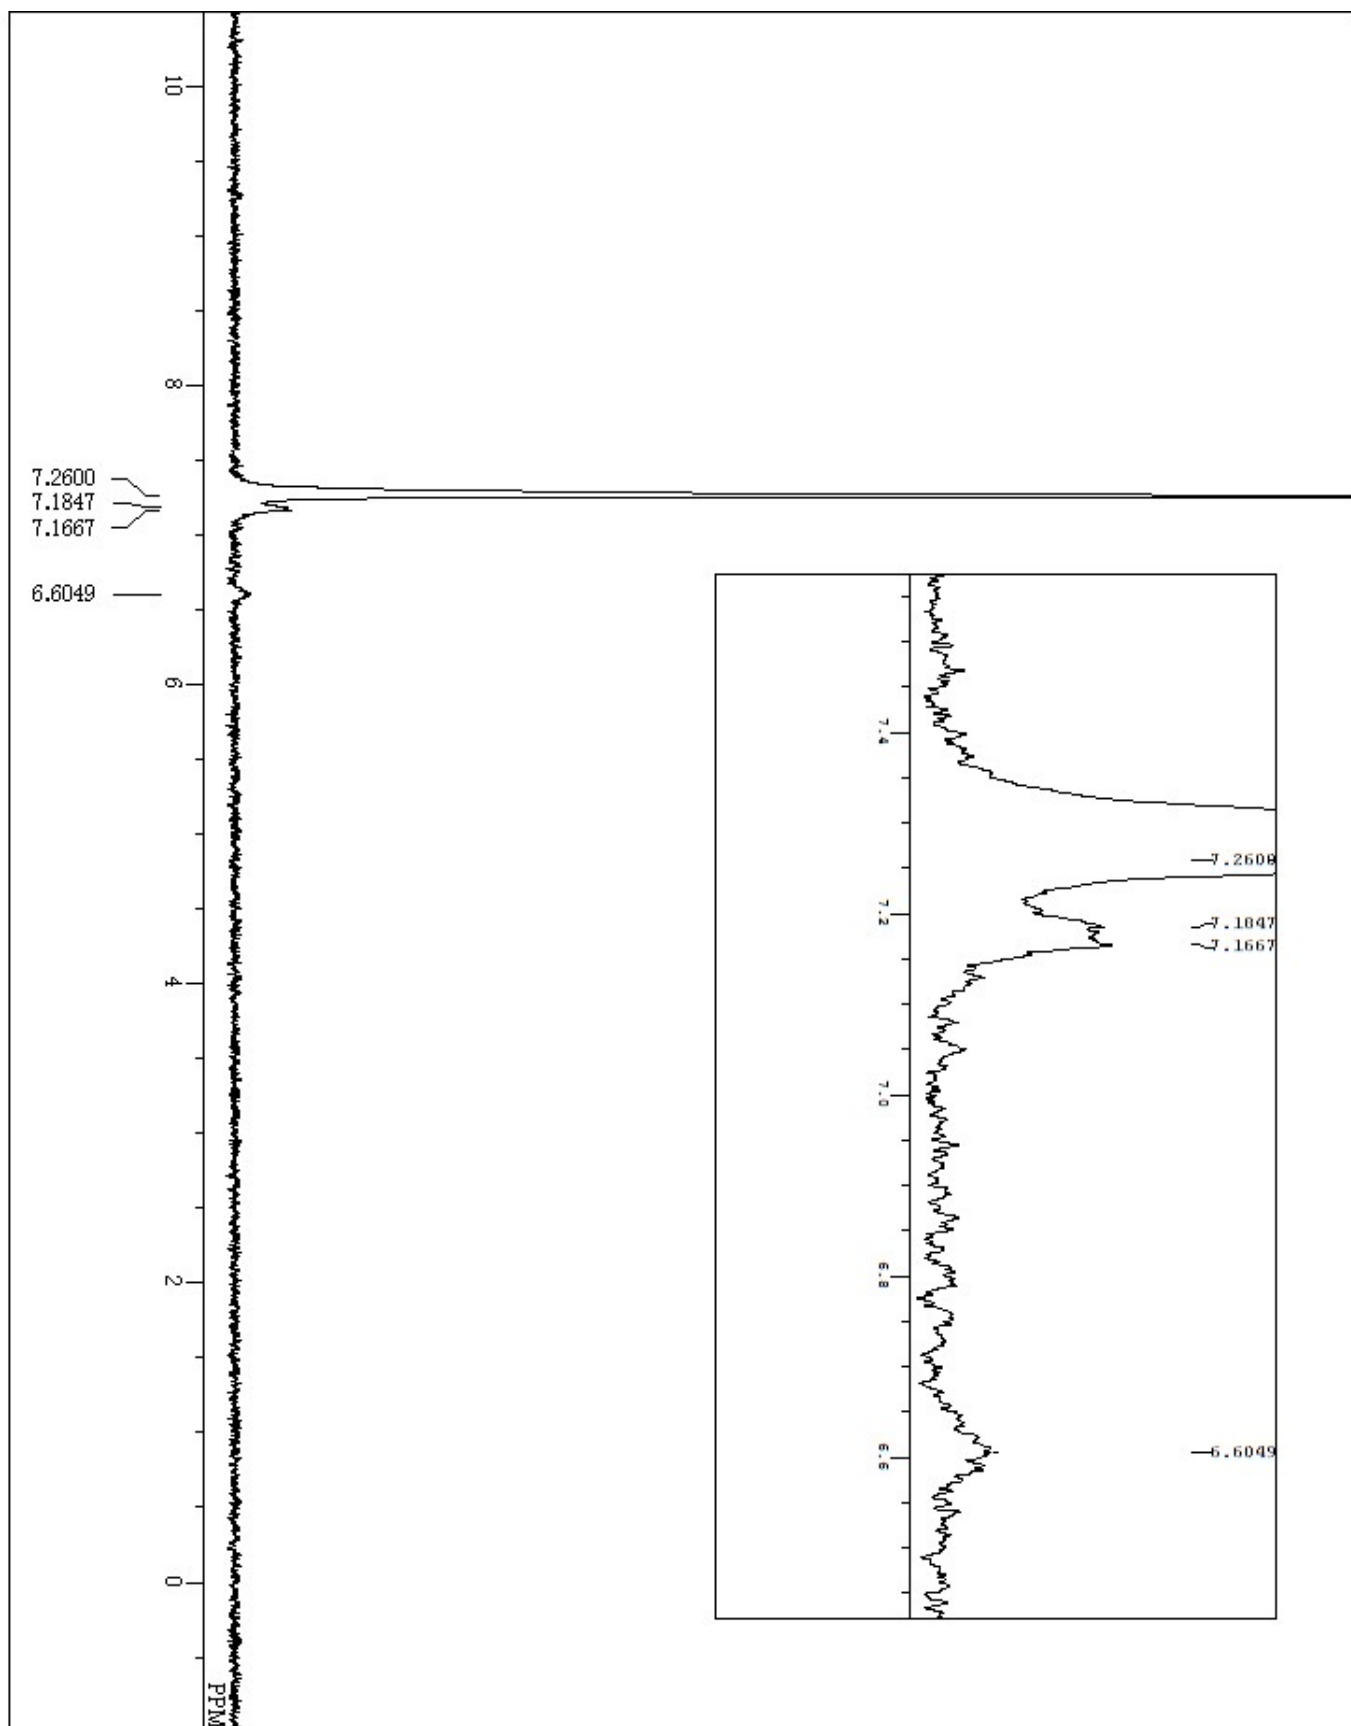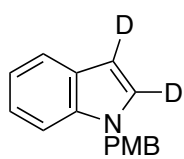

$^2\text{D}$ NMR in  $\text{CHCl}_3$

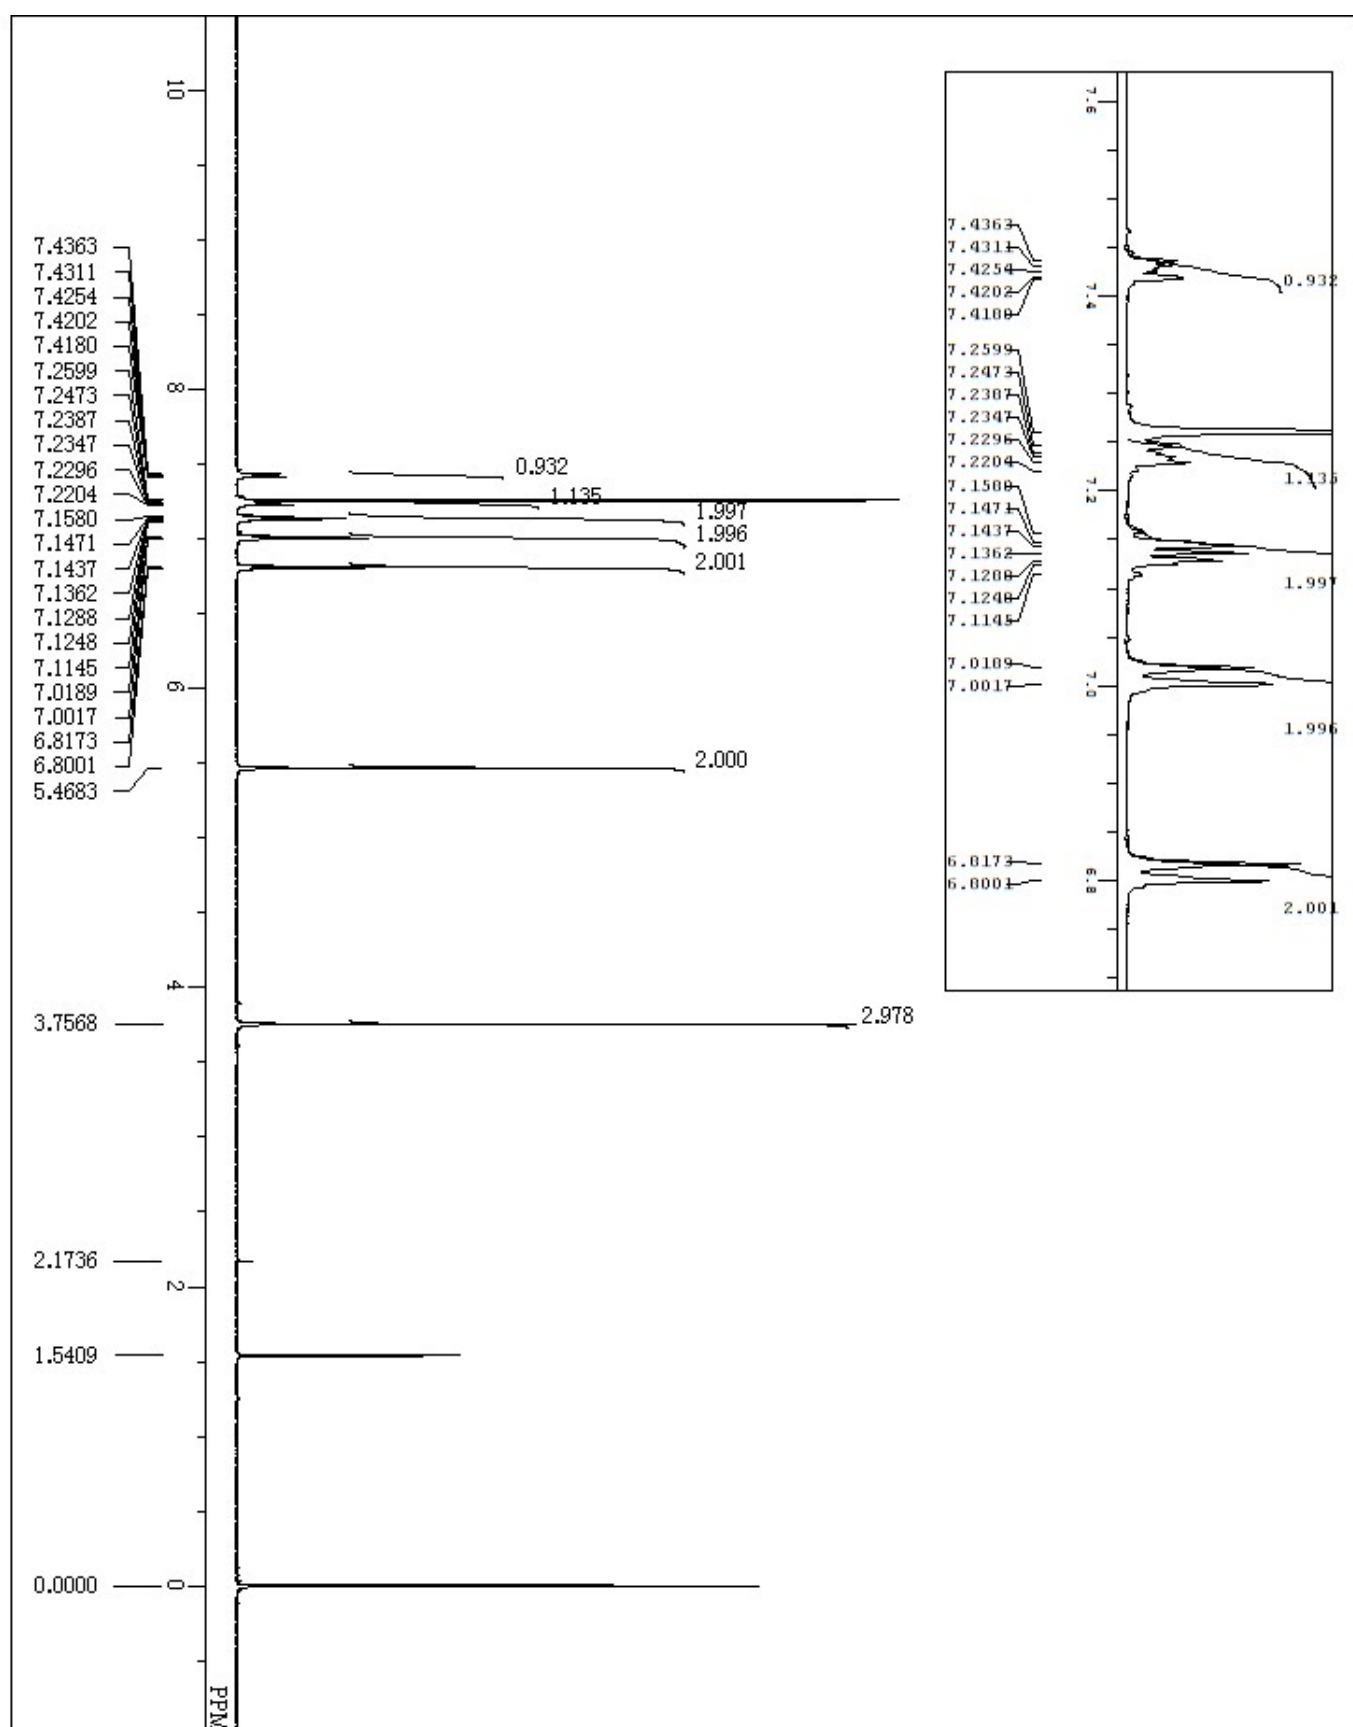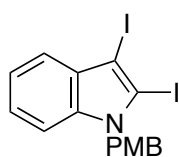

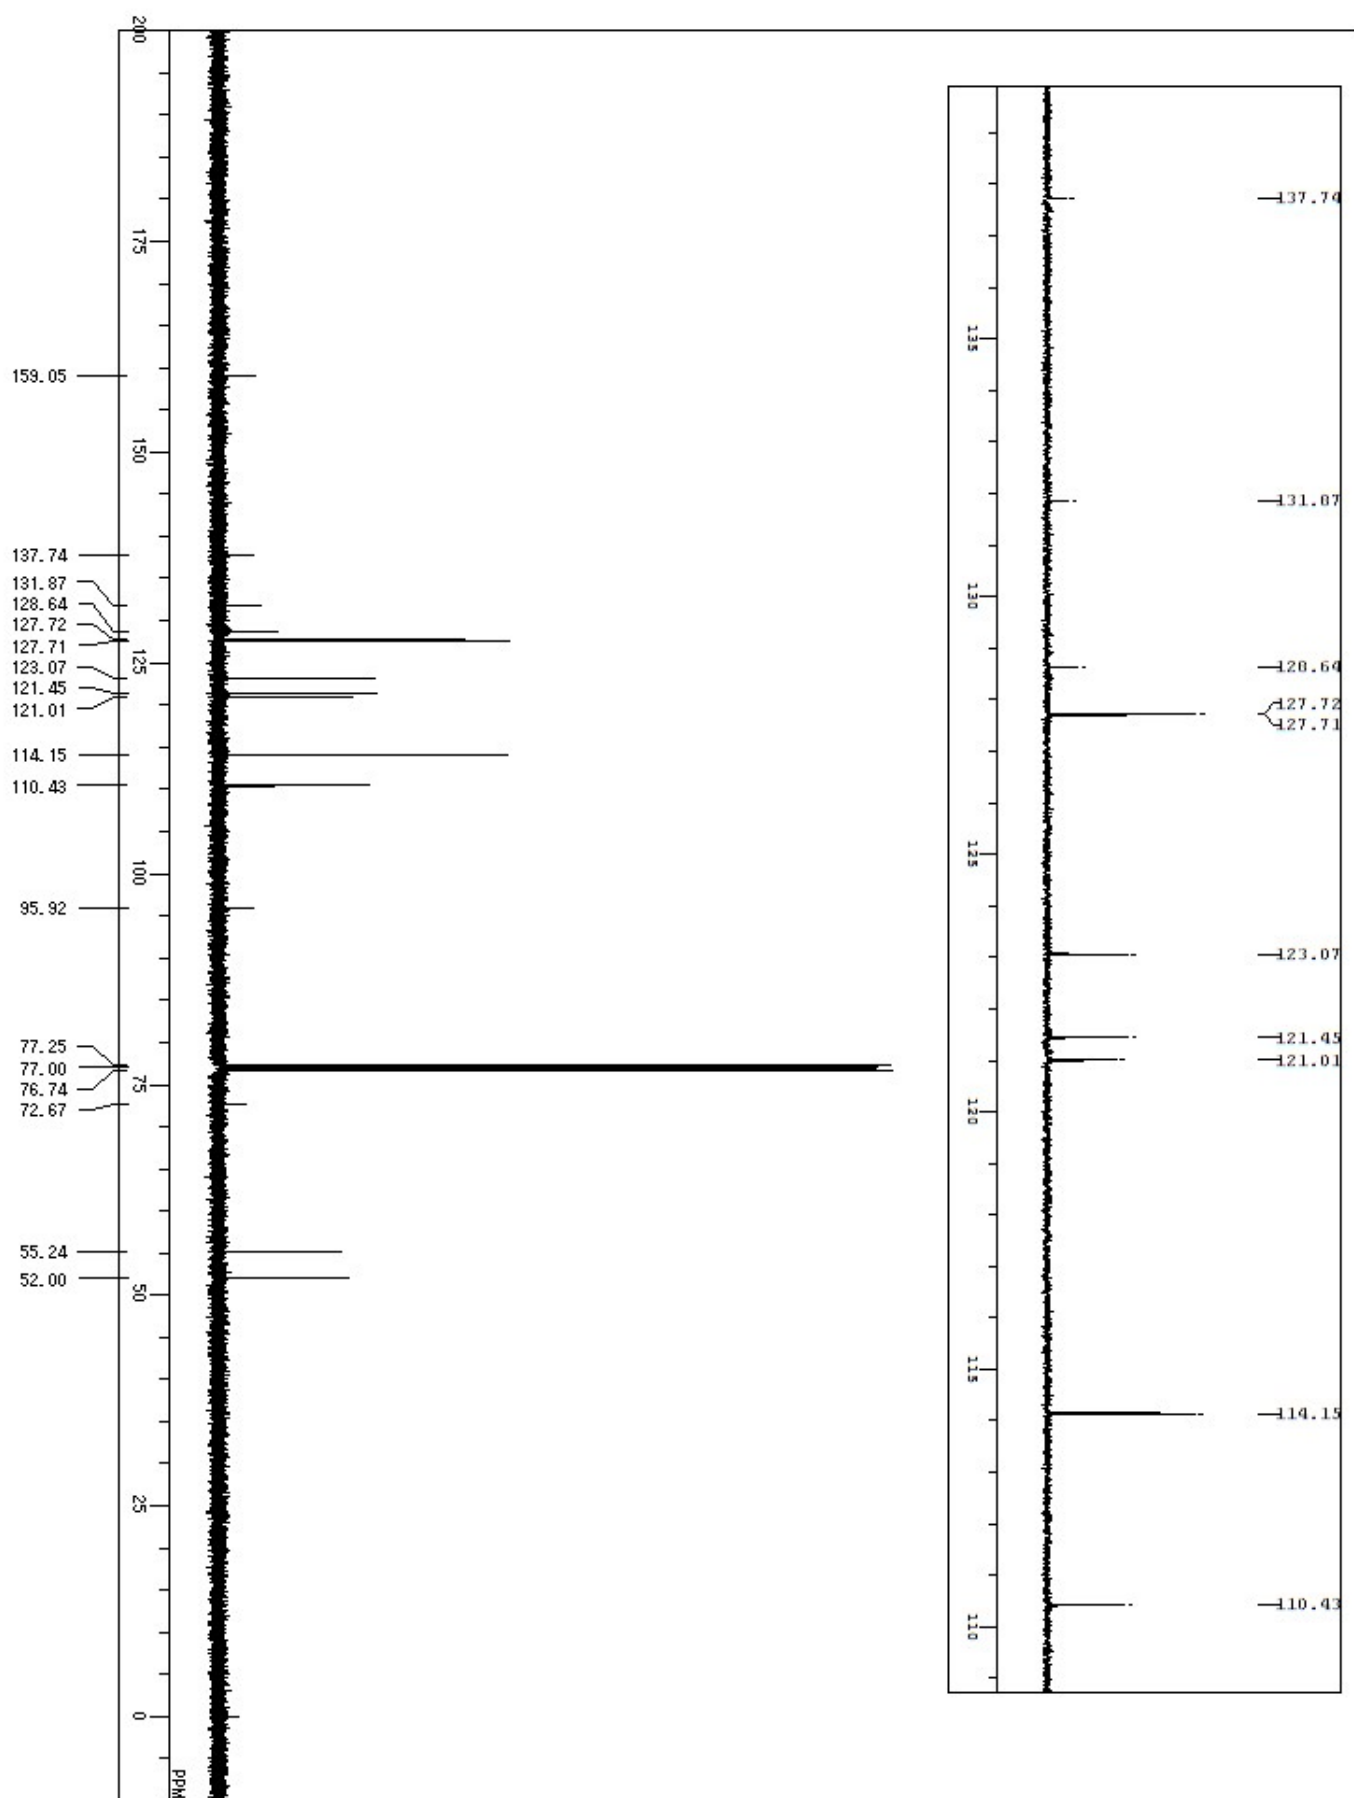

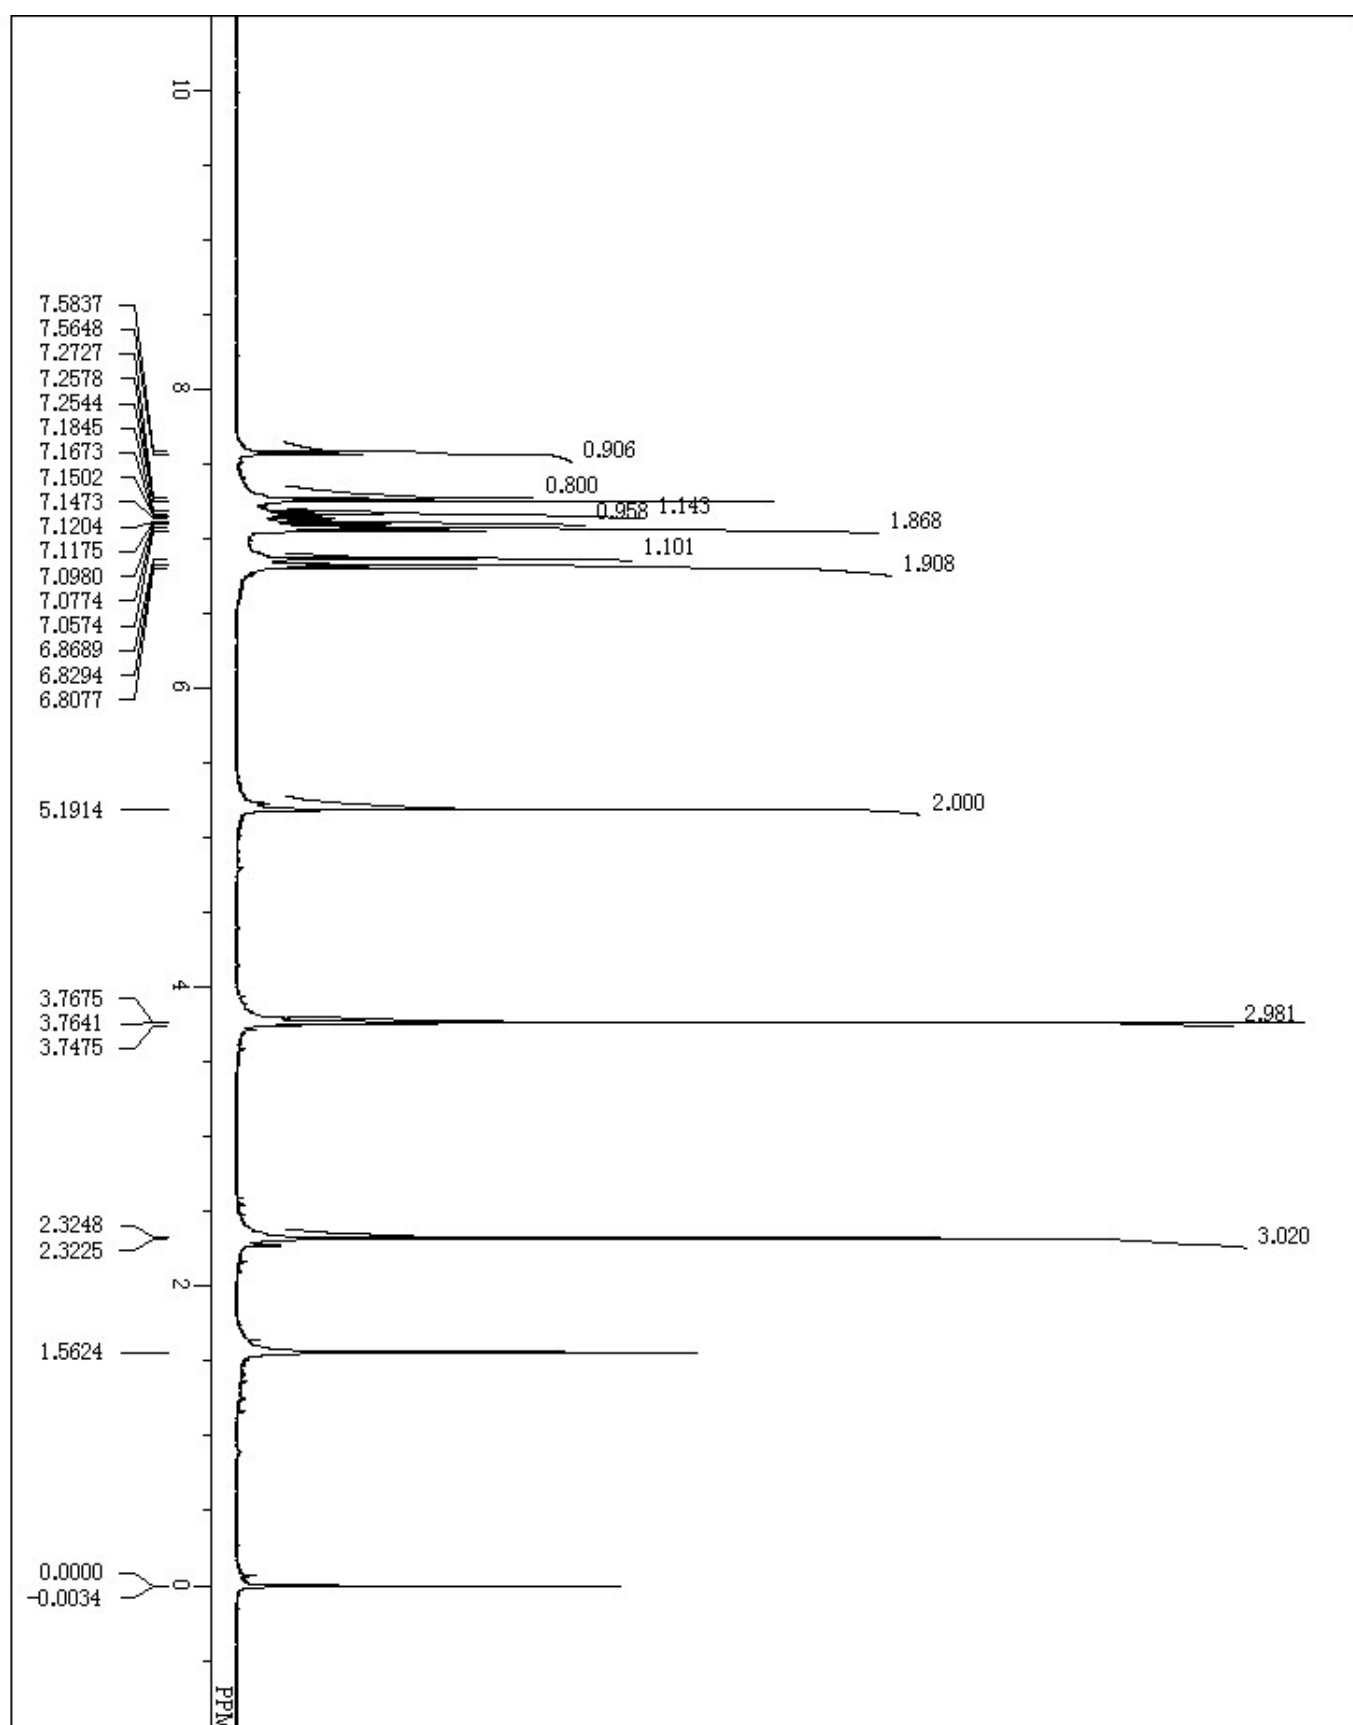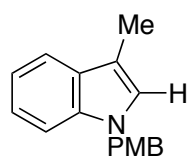

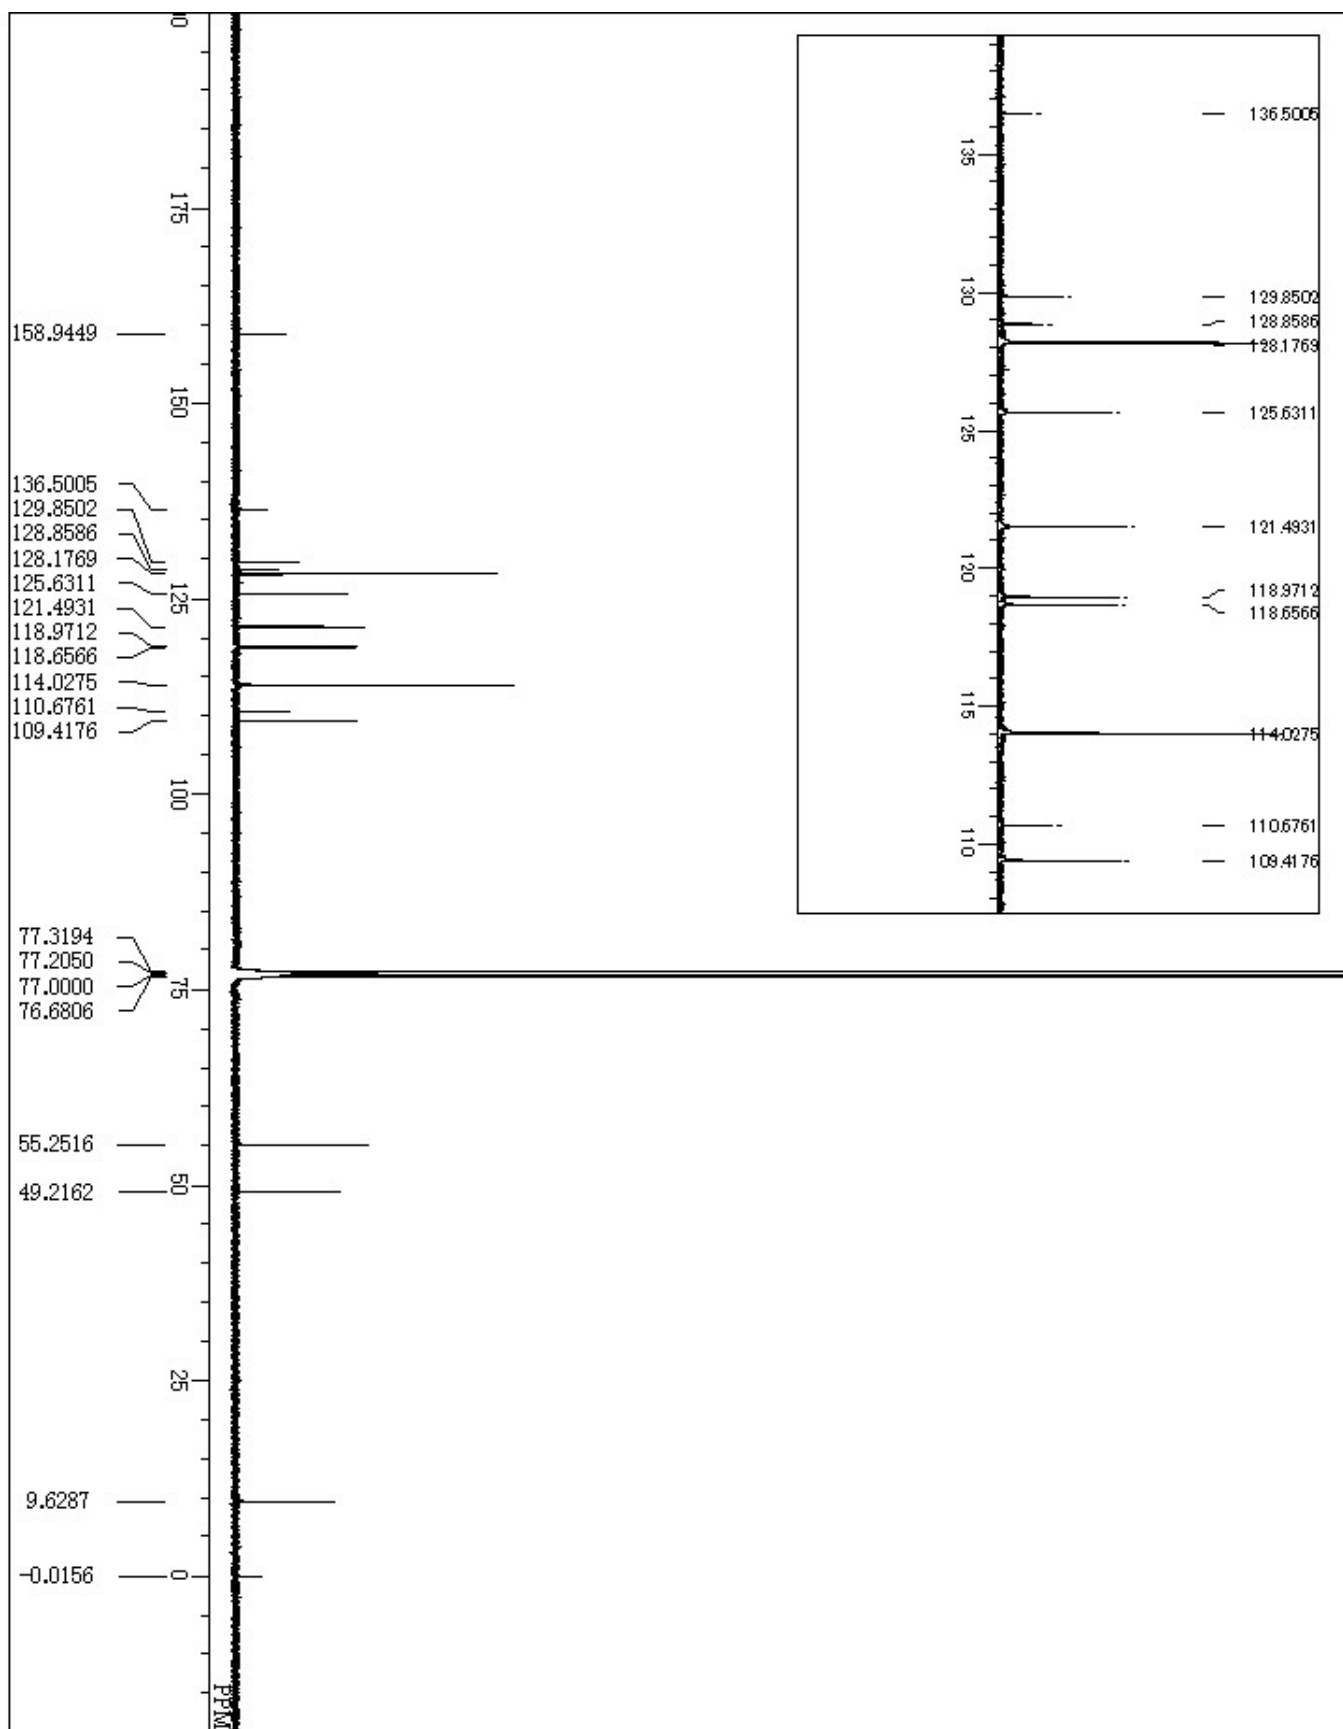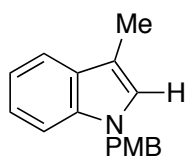

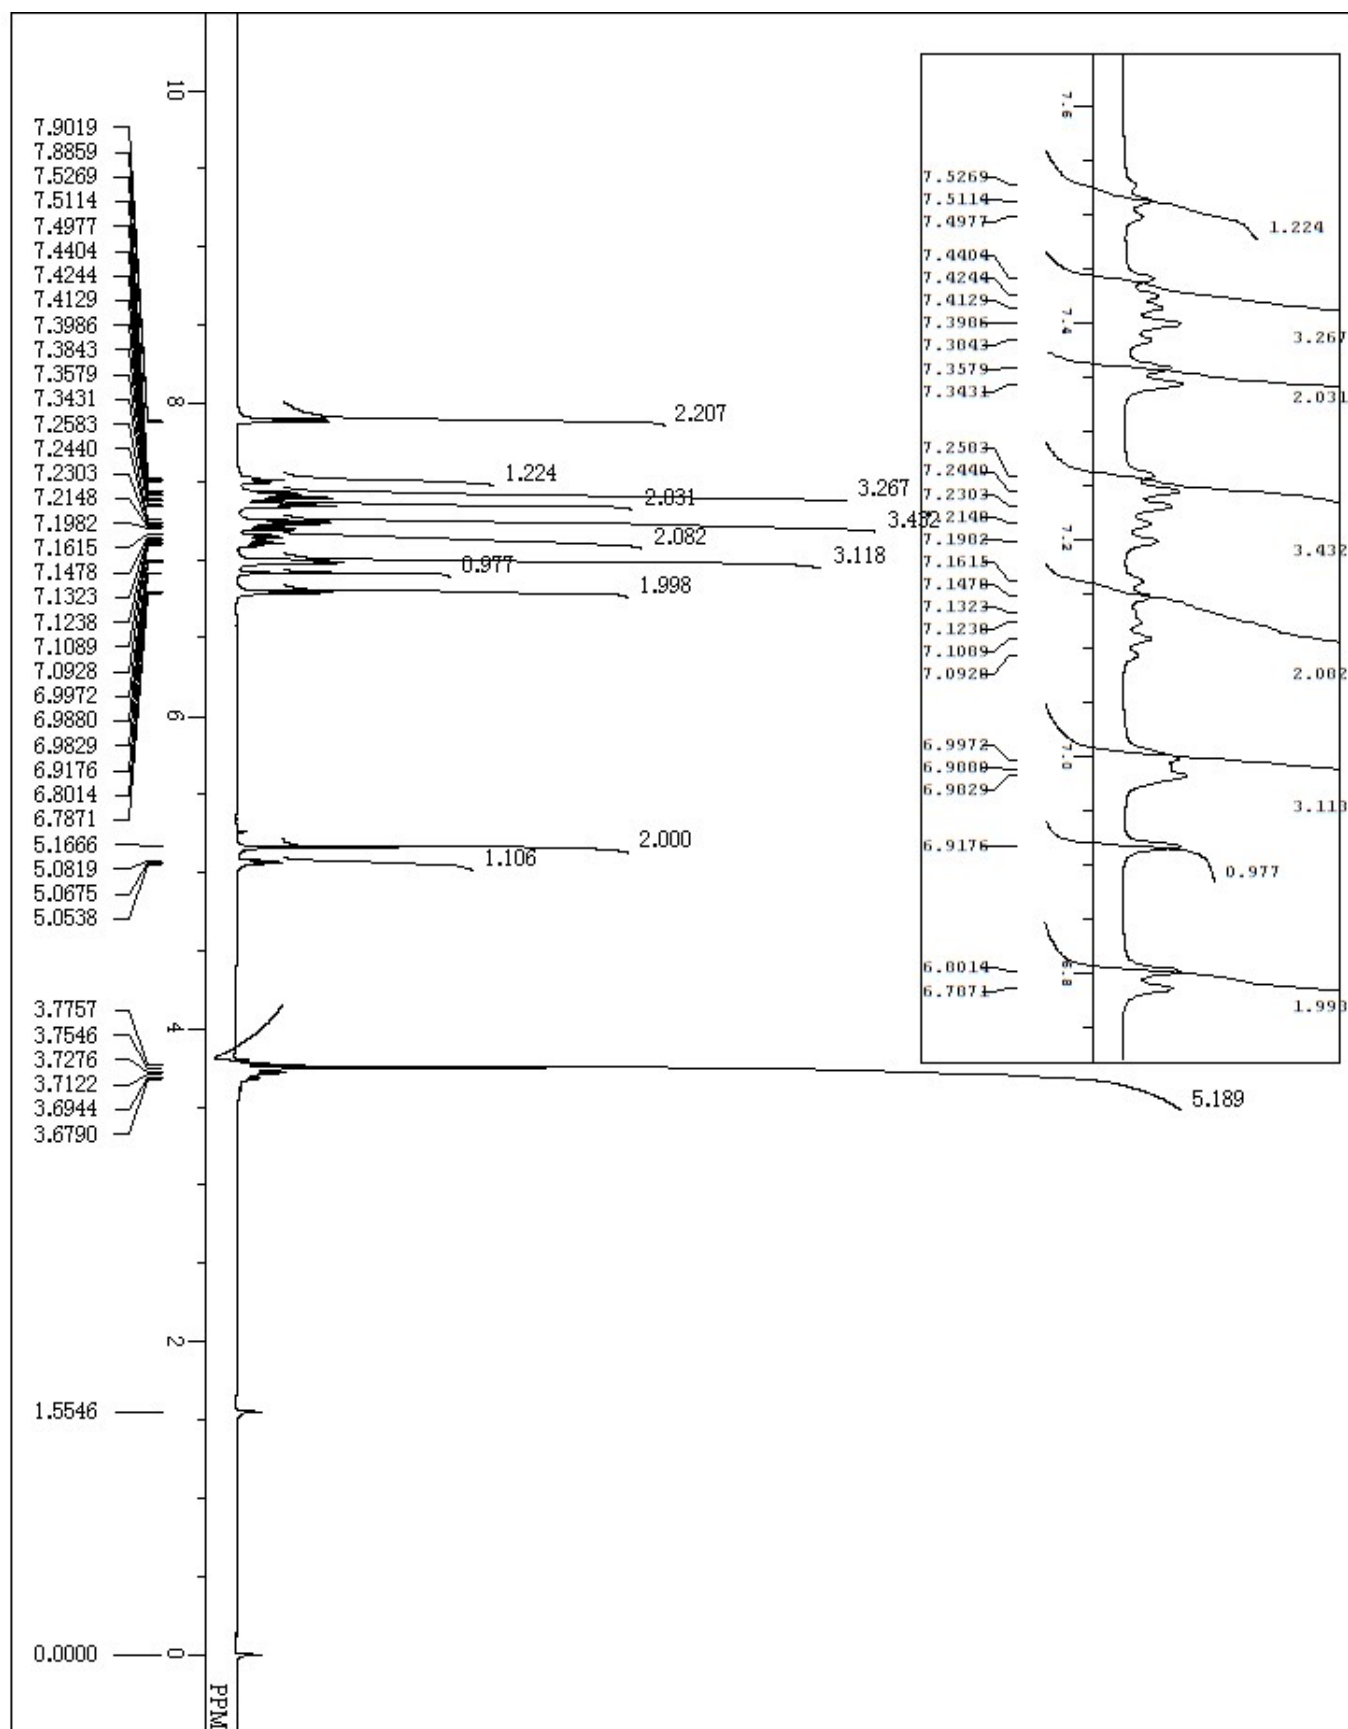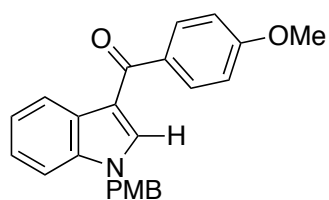



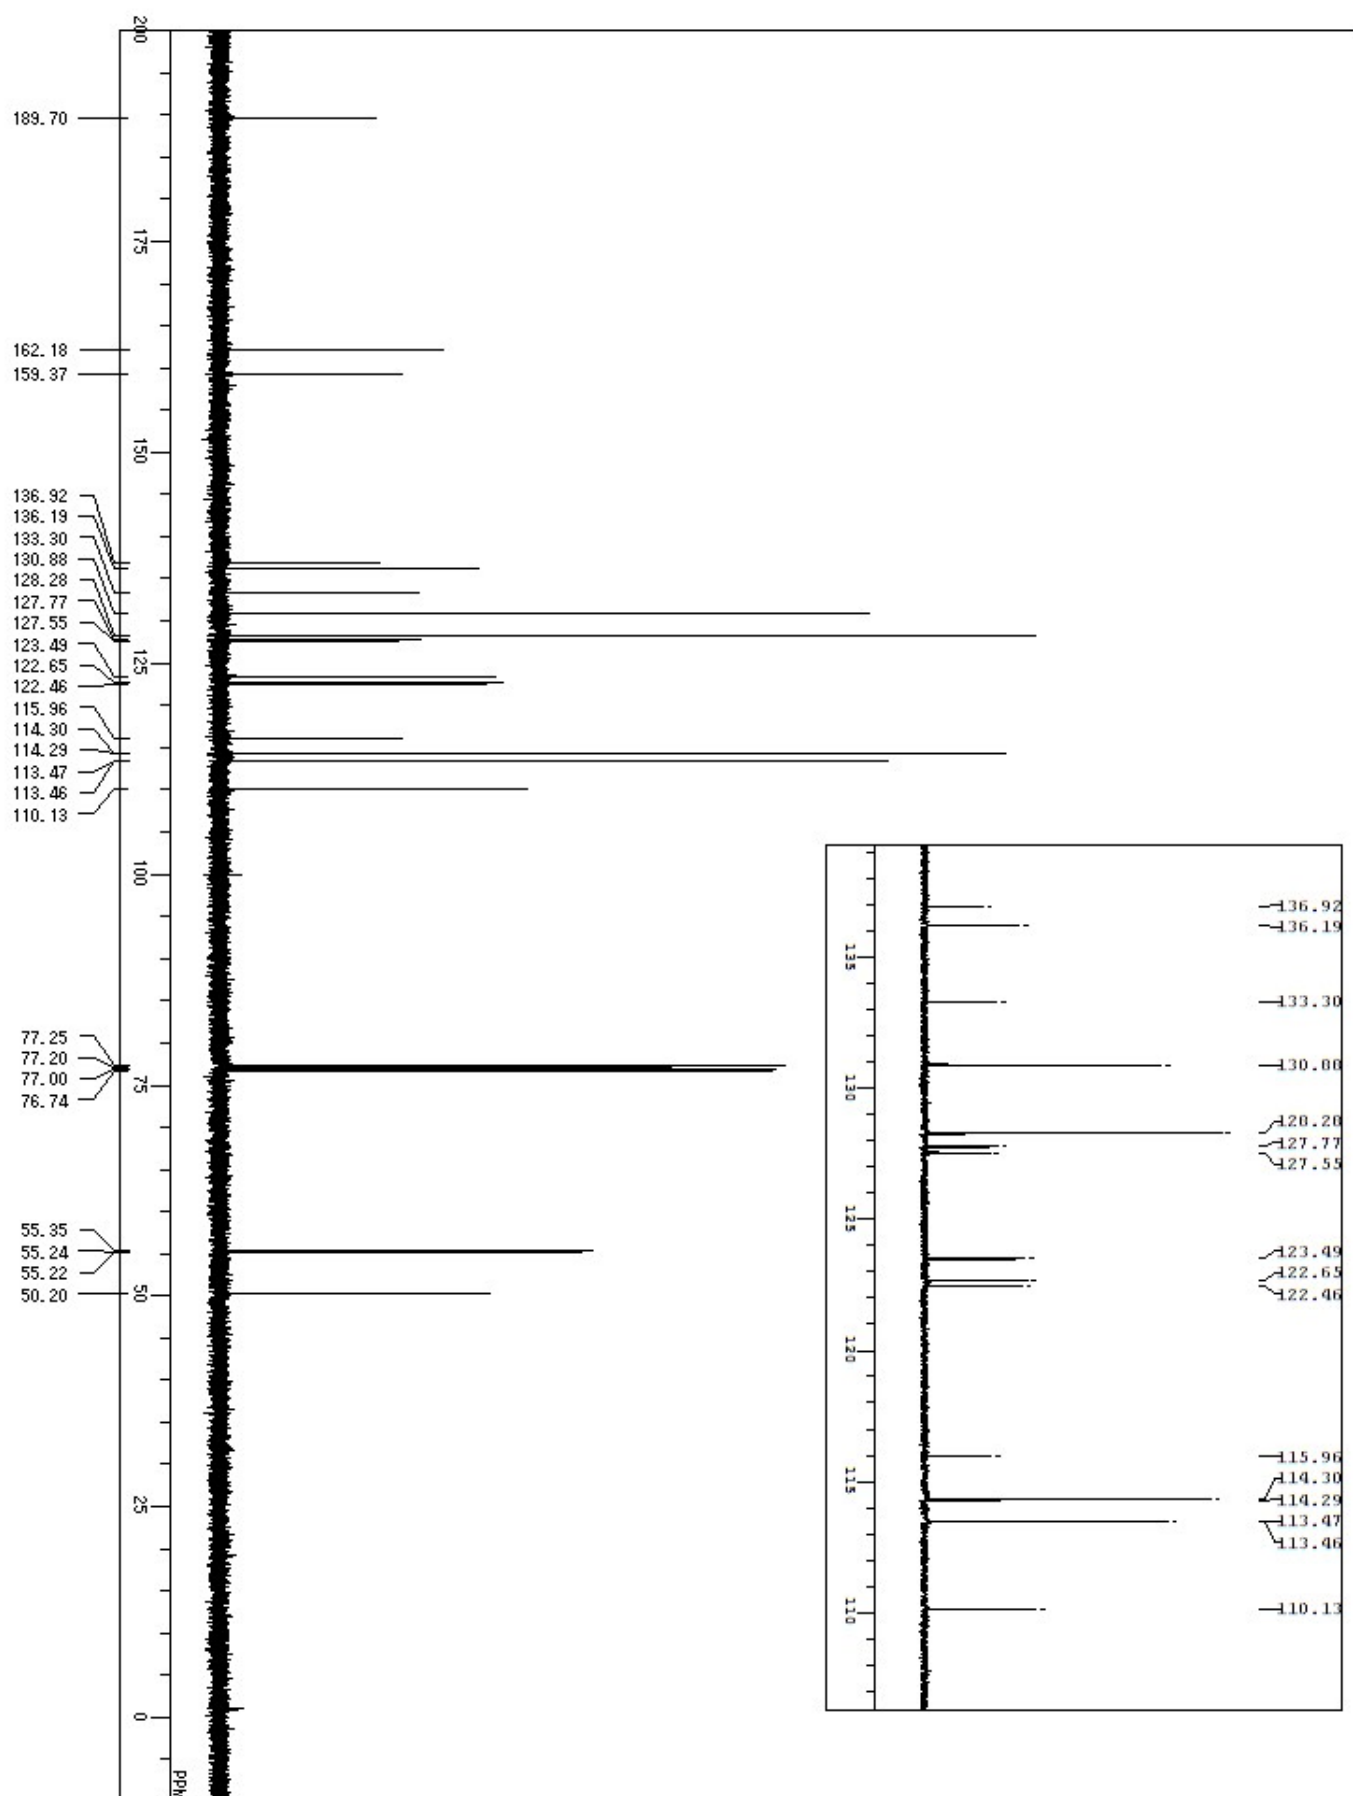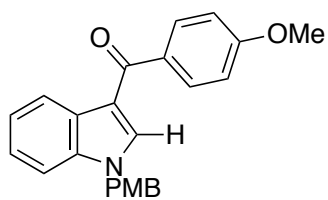

noe

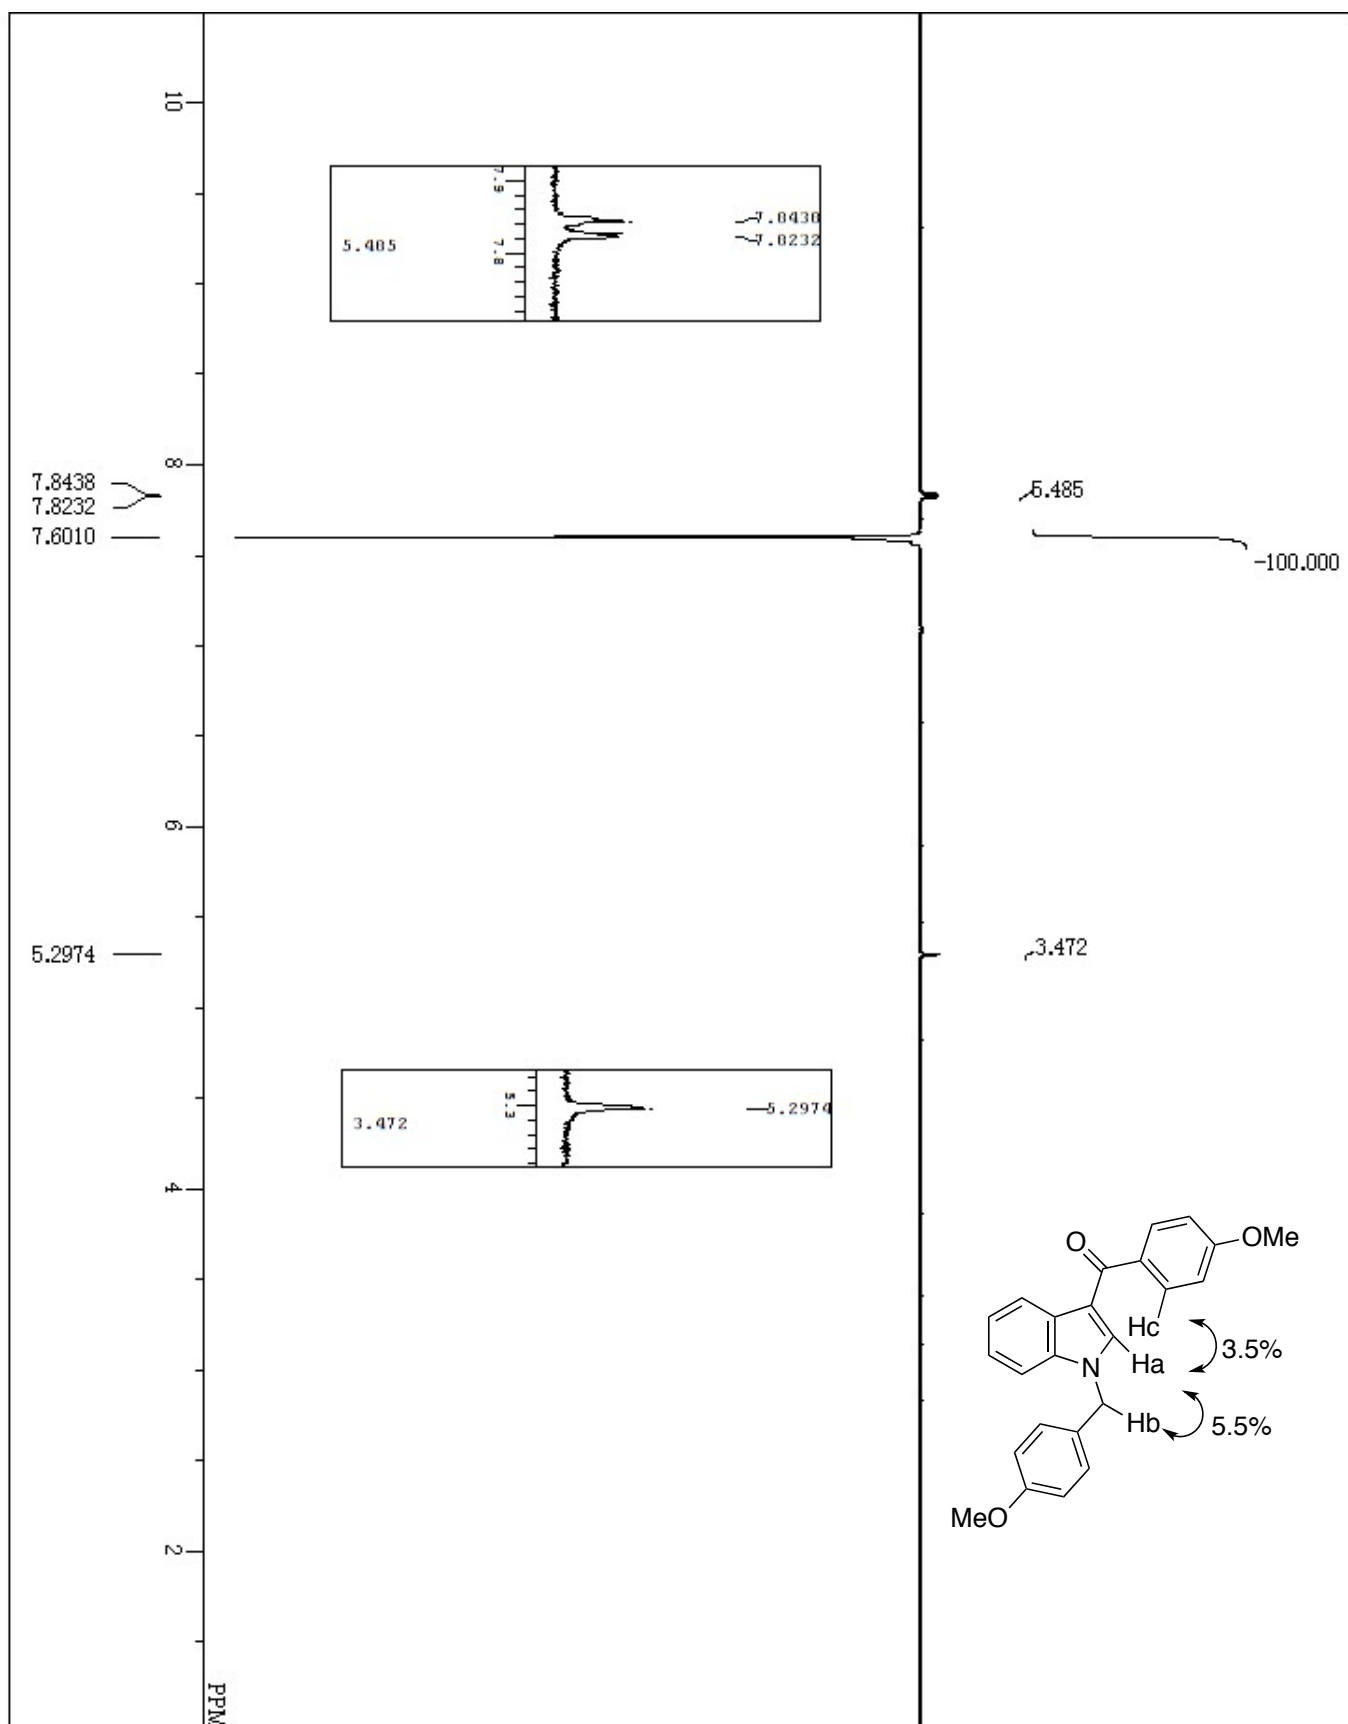

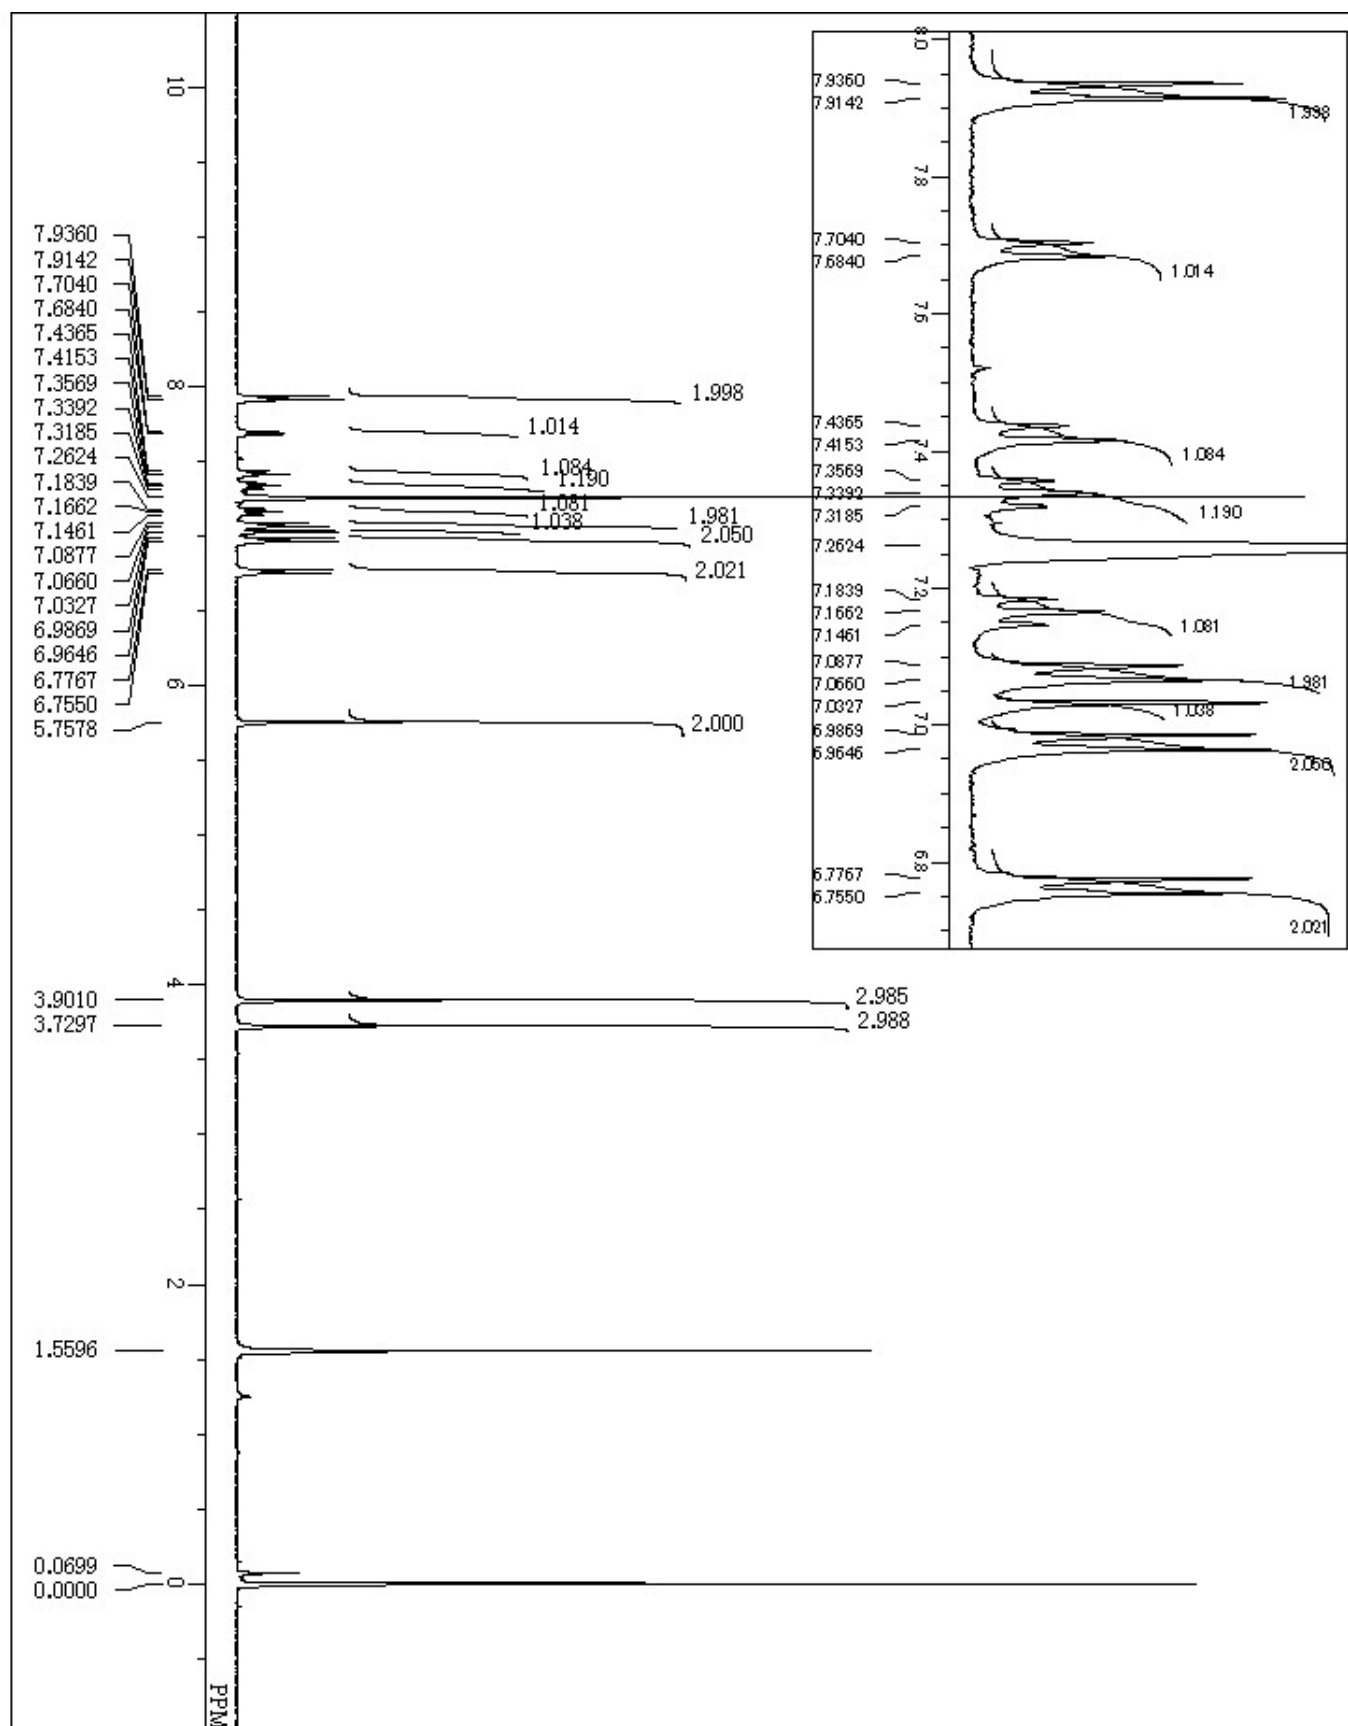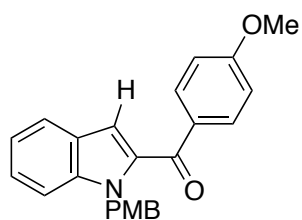

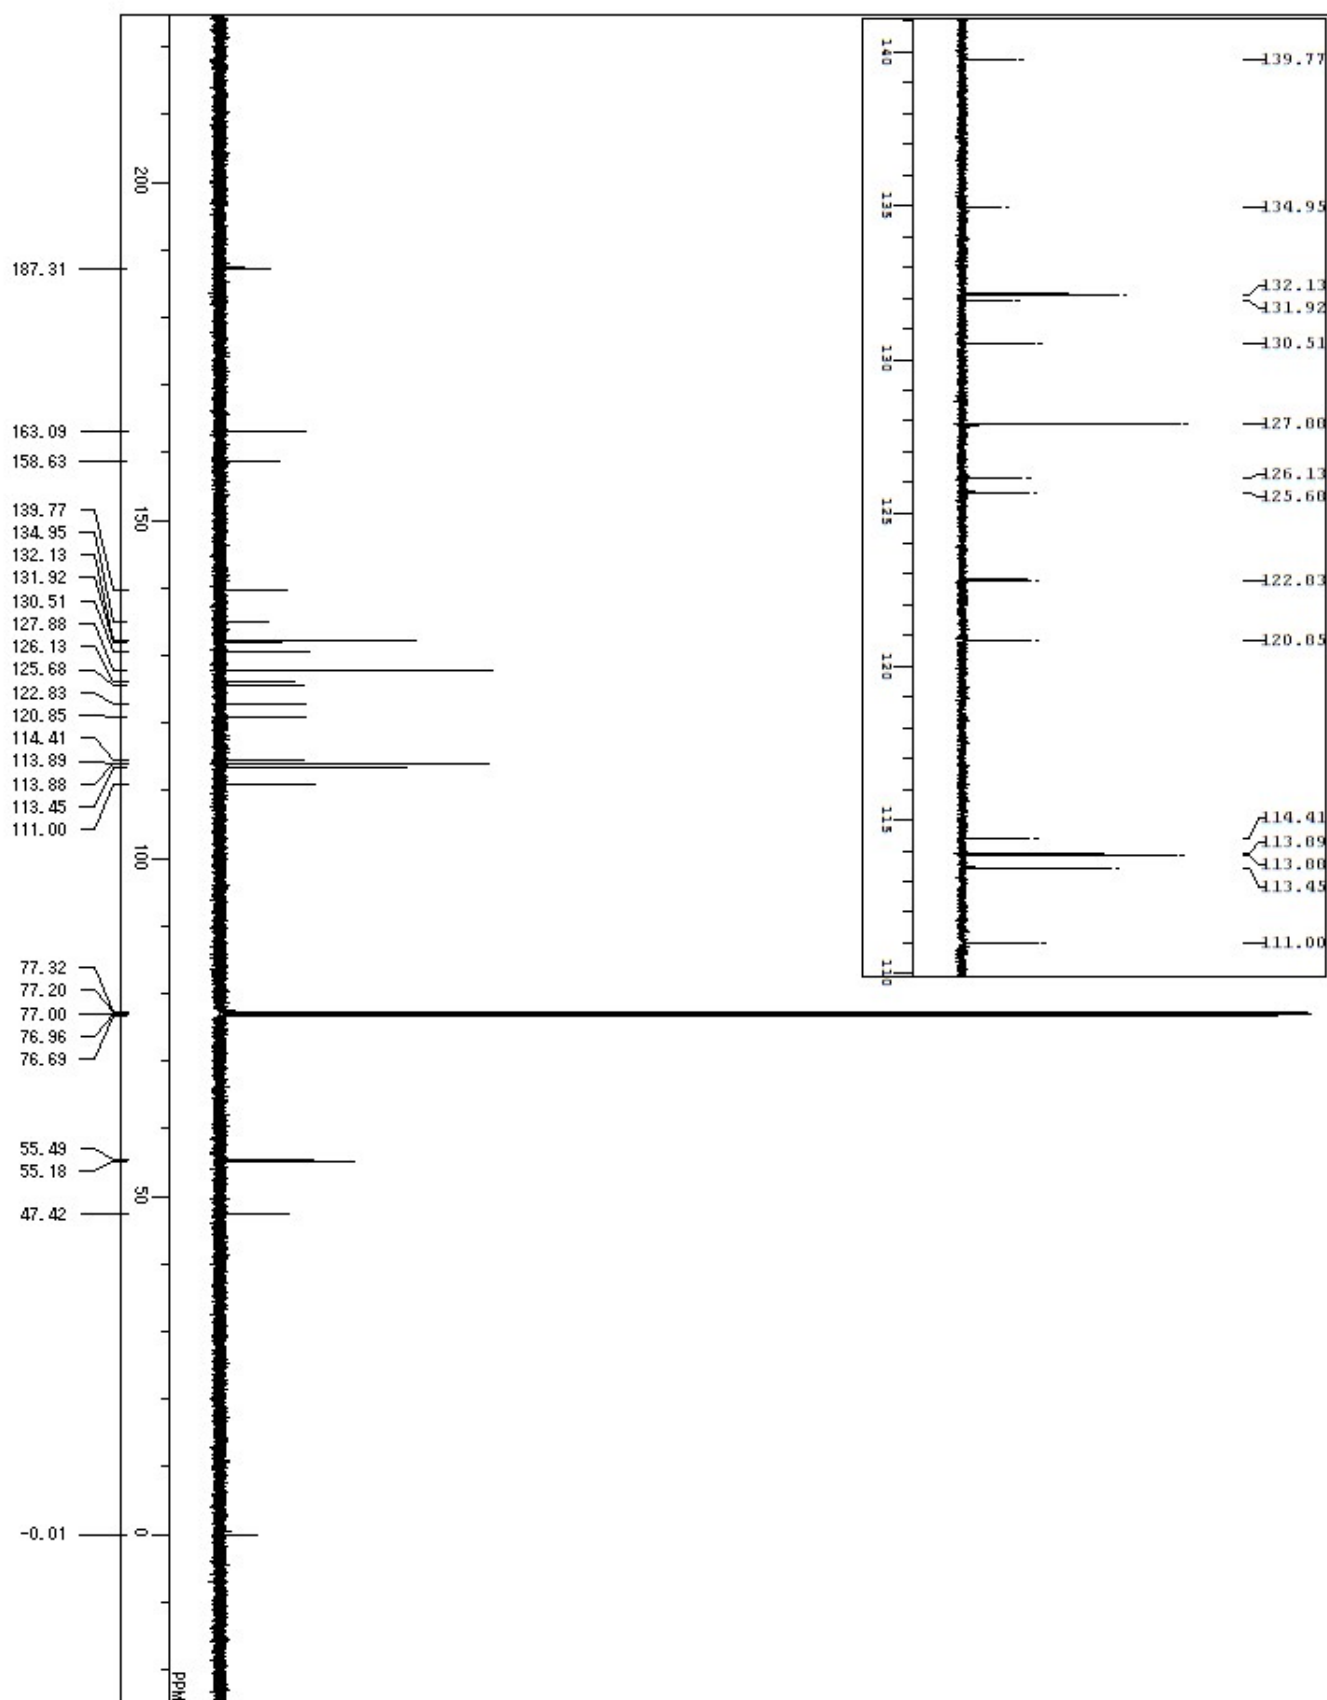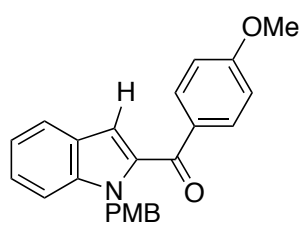

noe

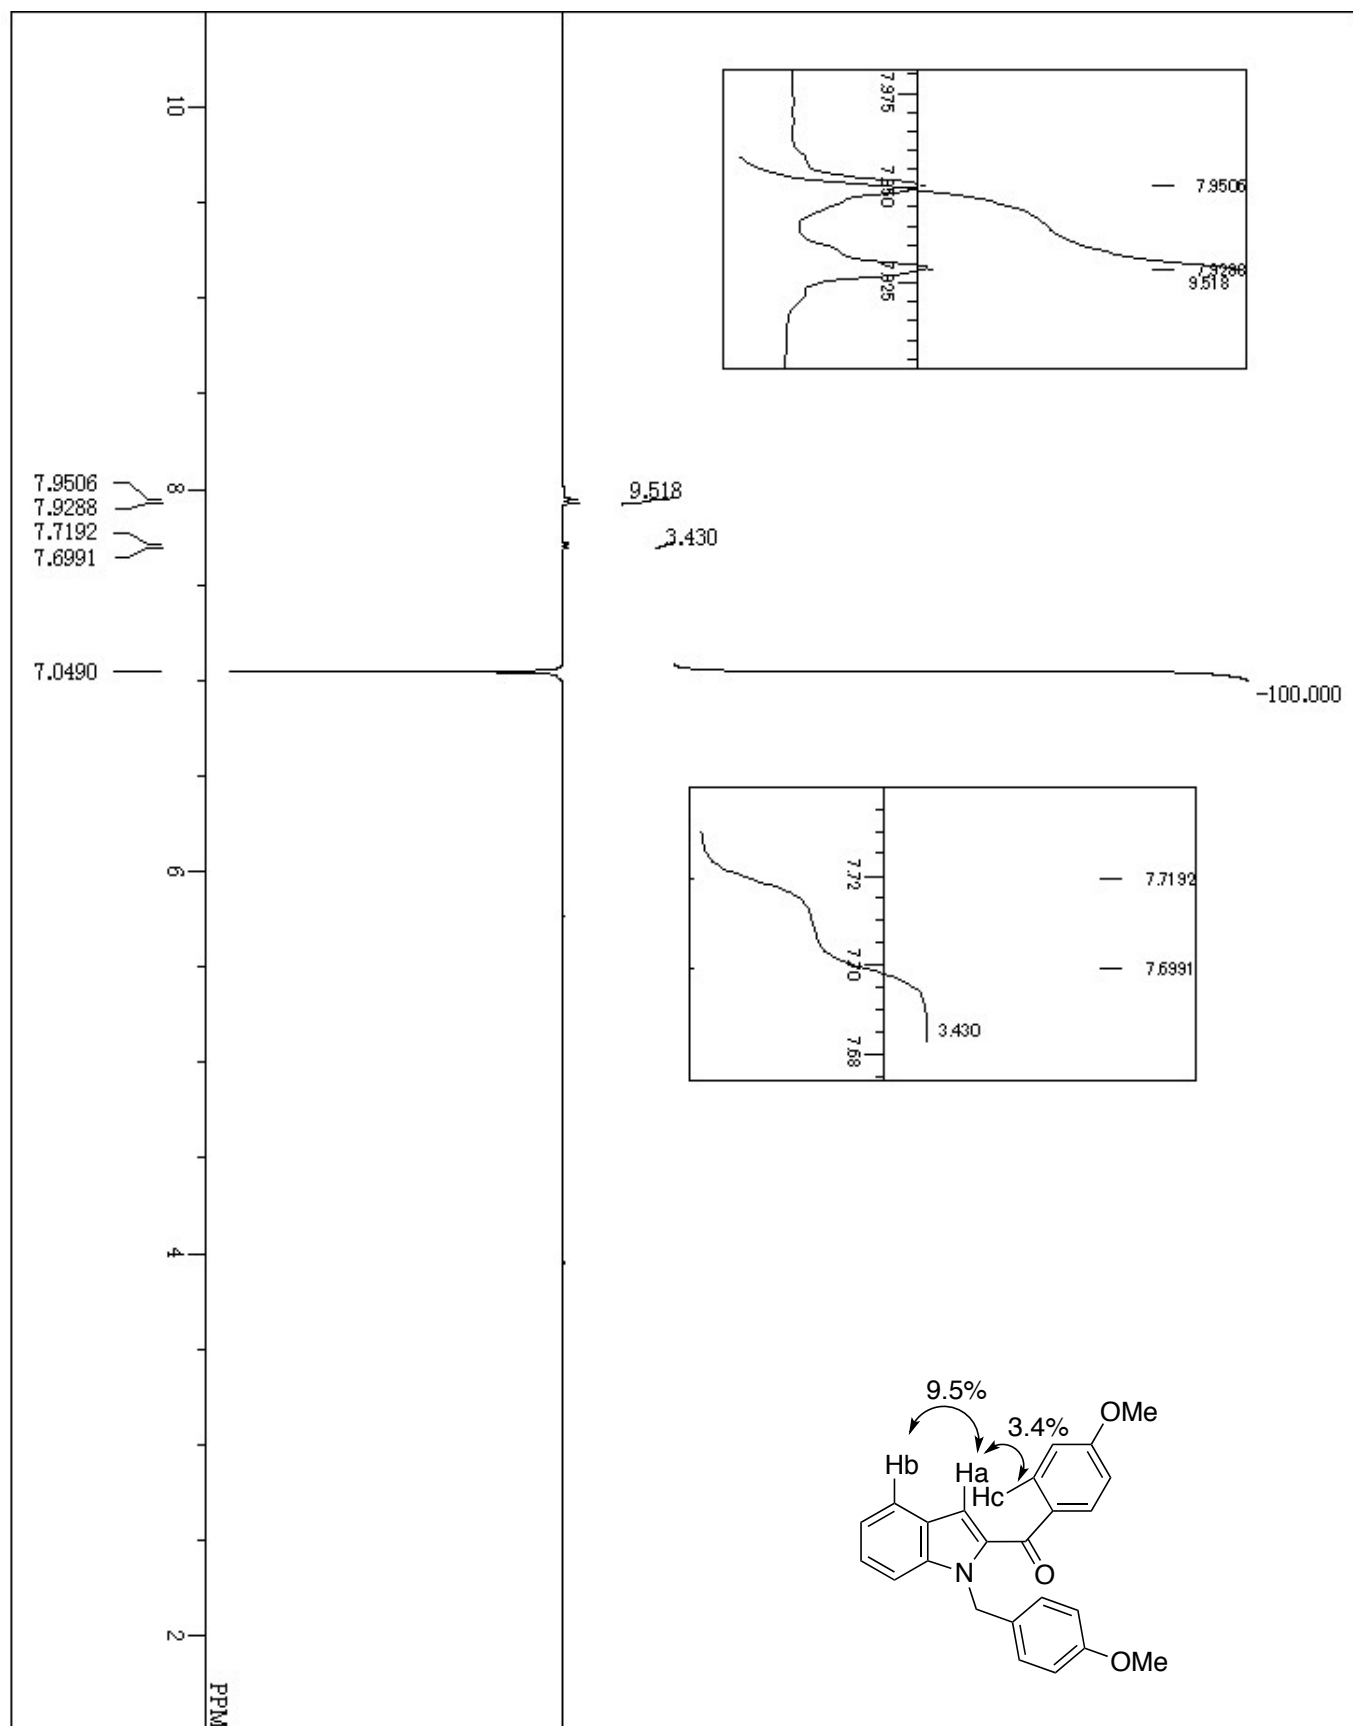

noe

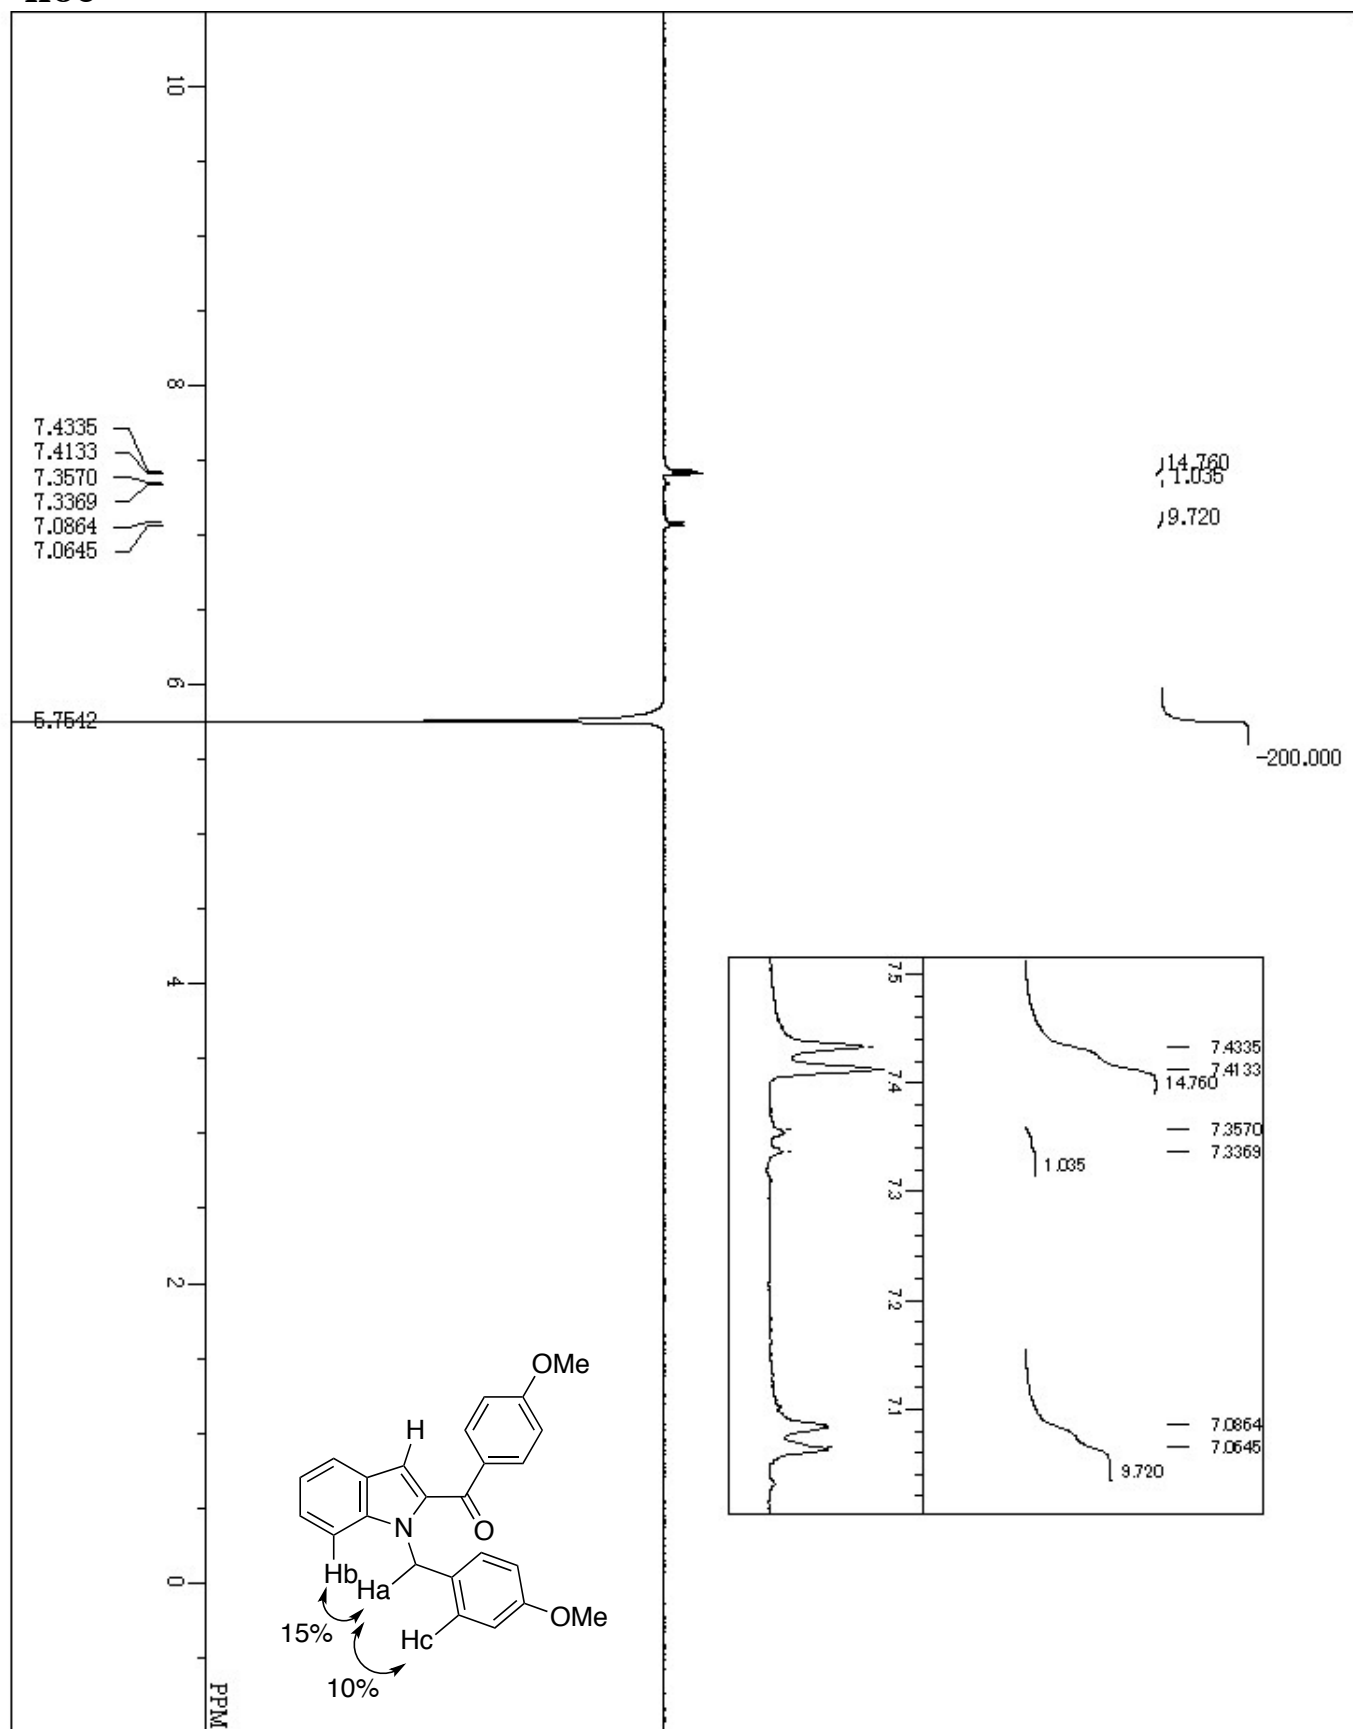

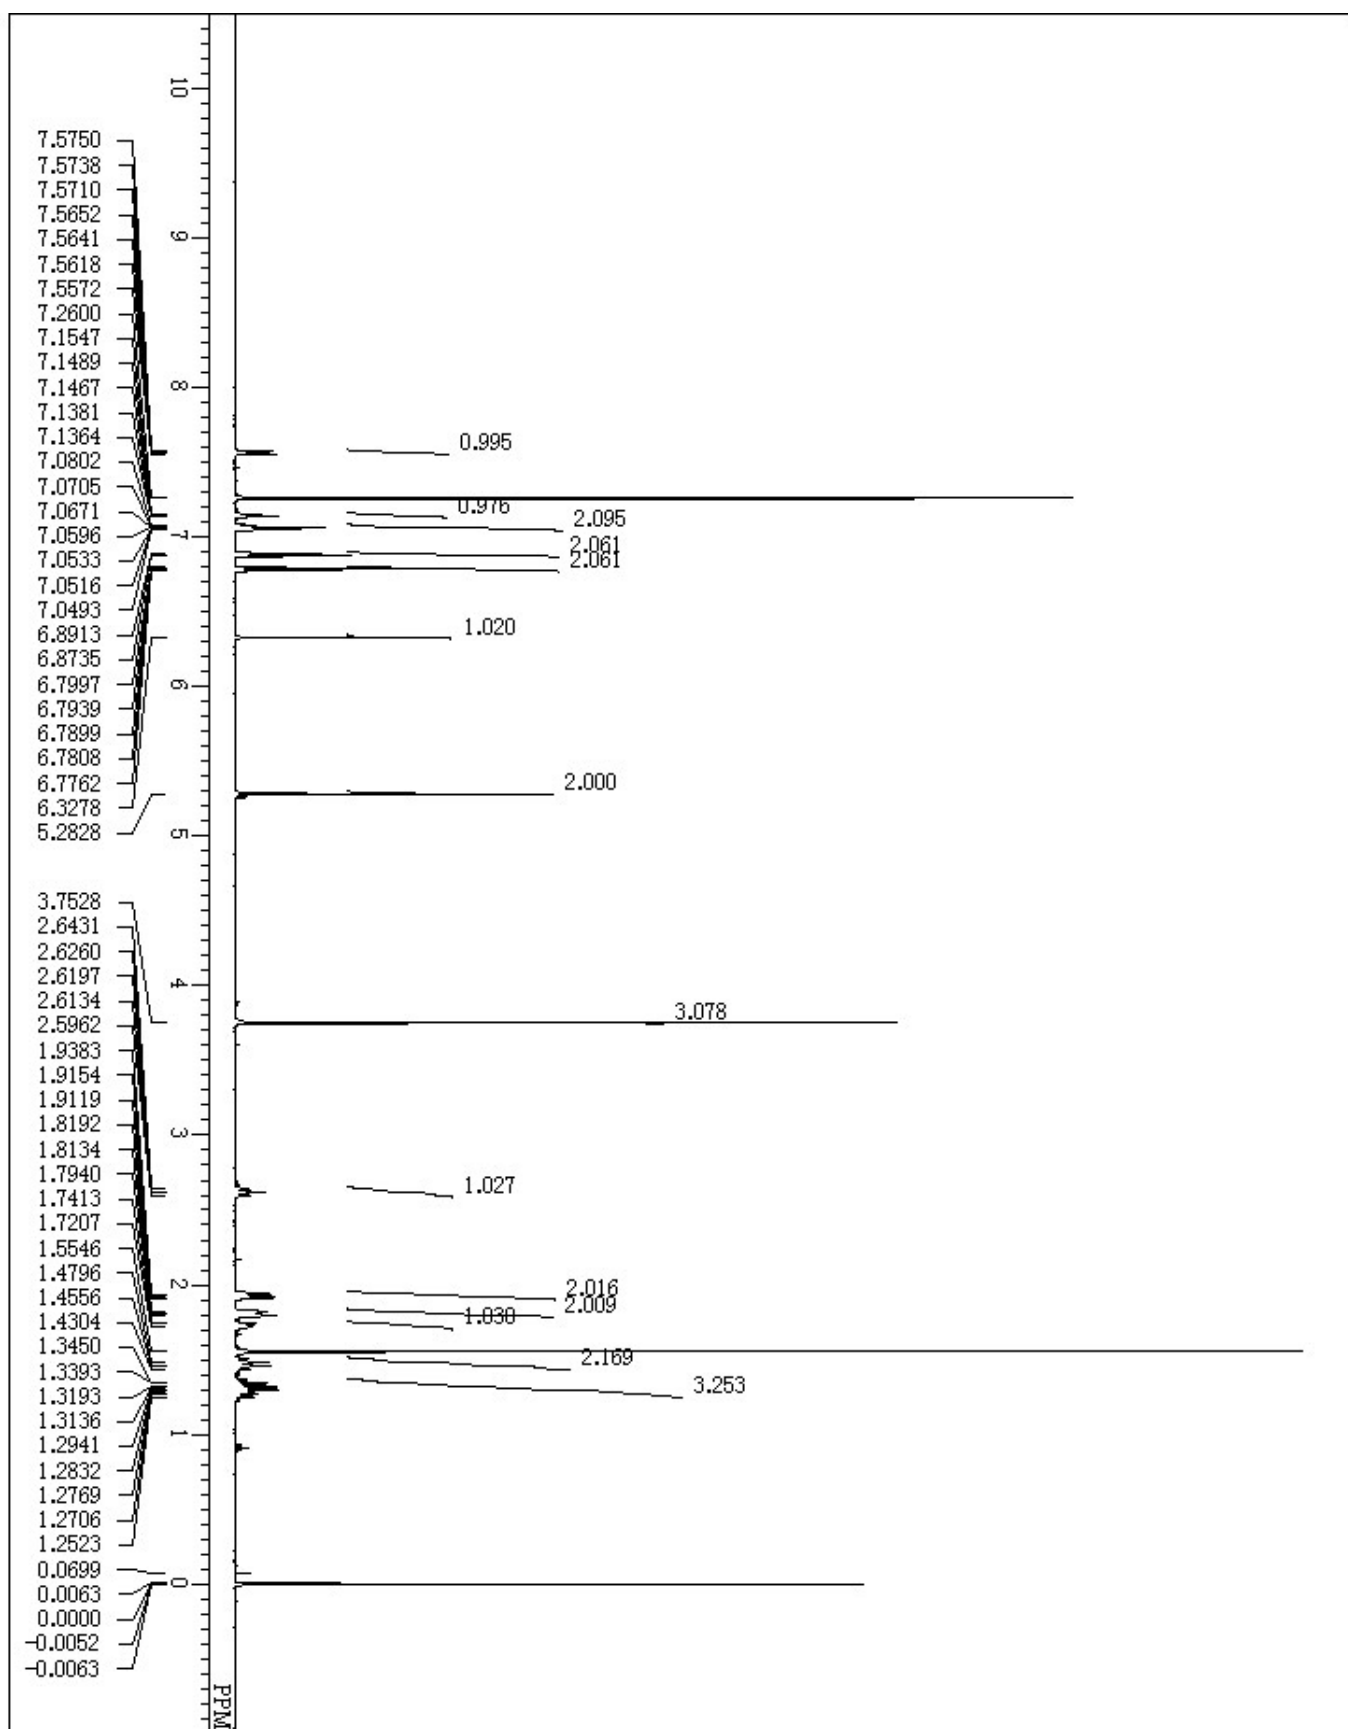

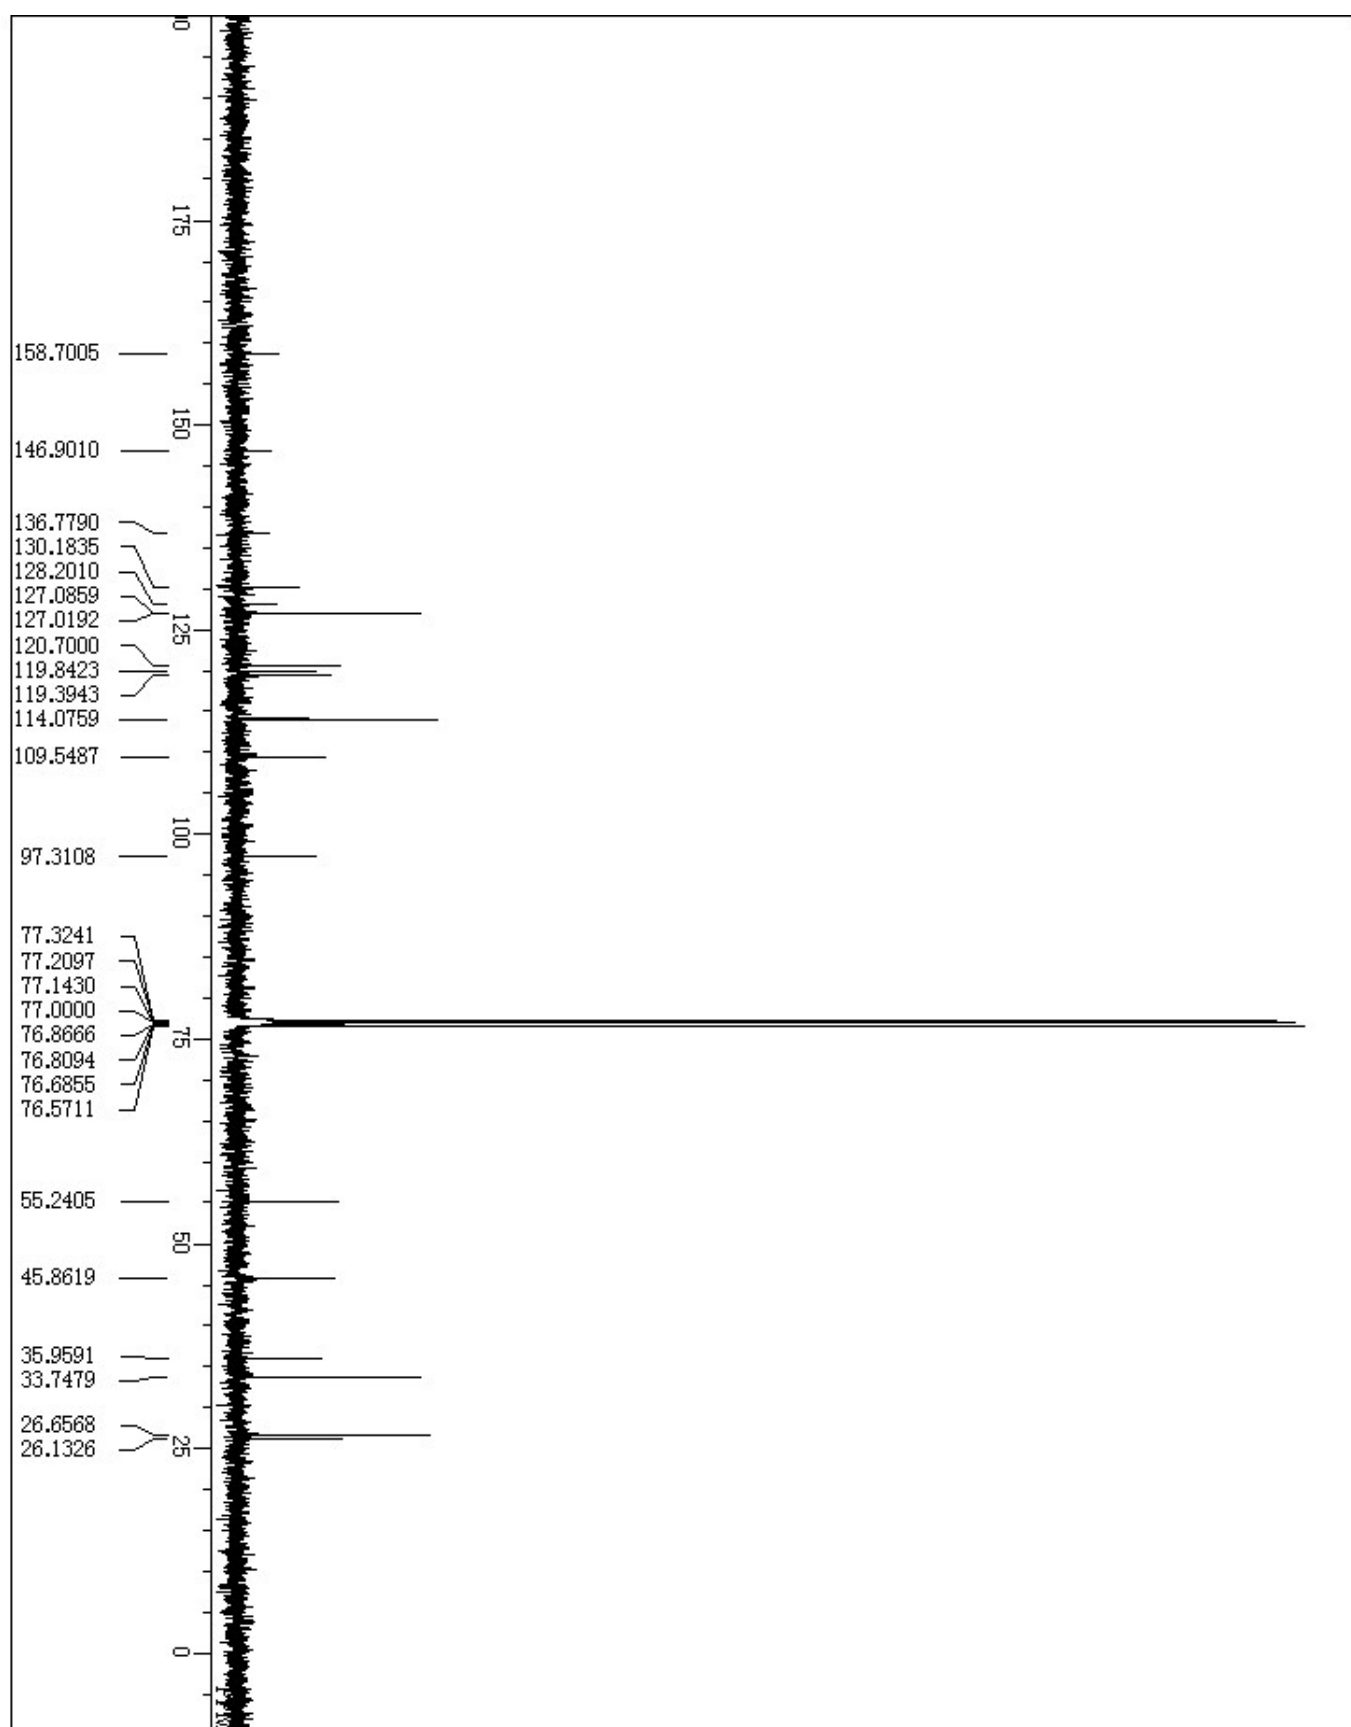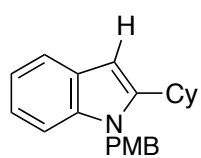



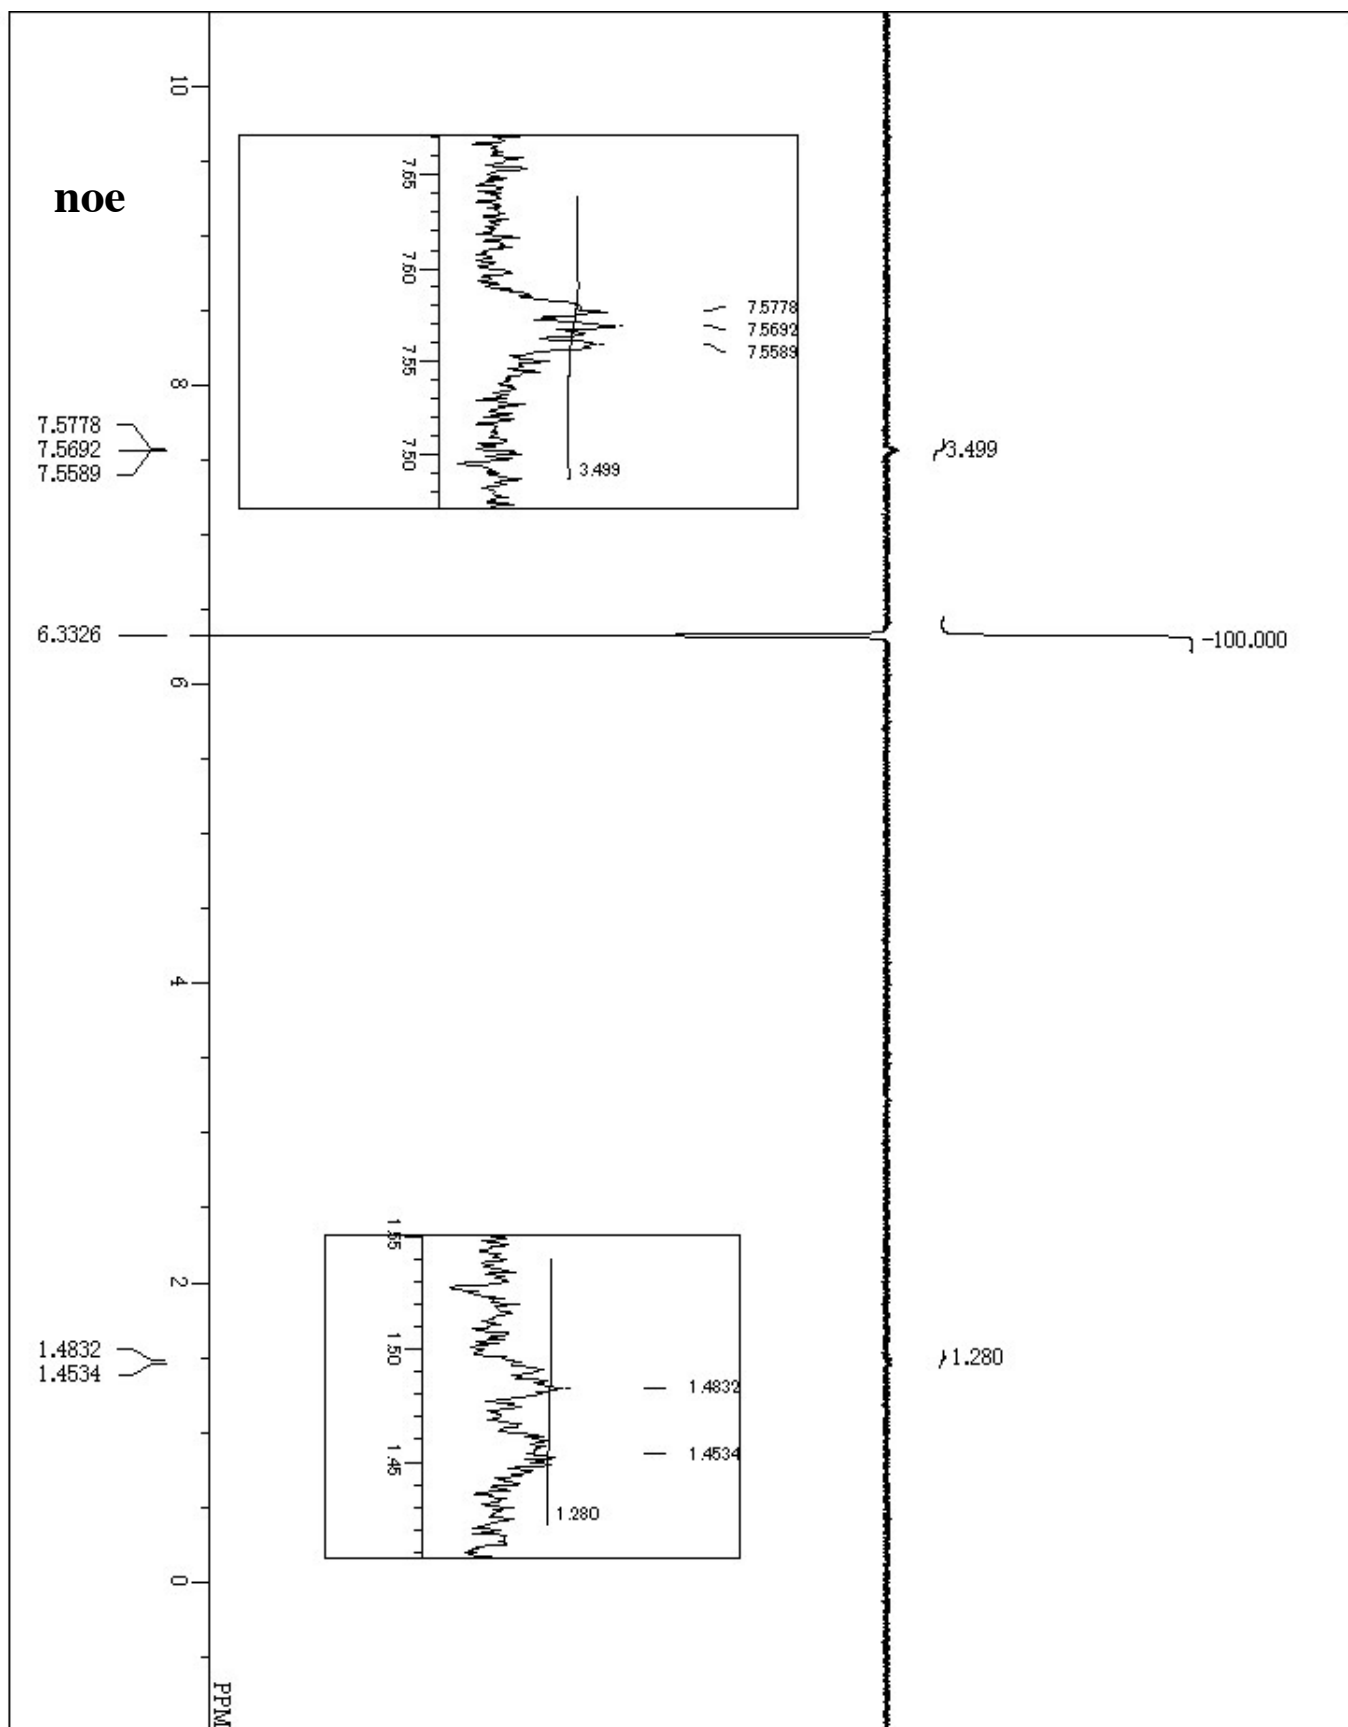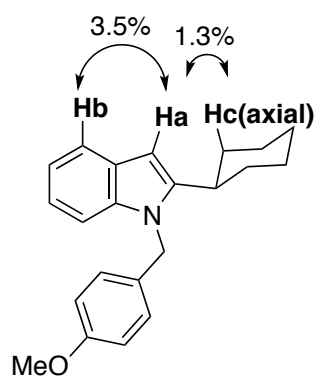

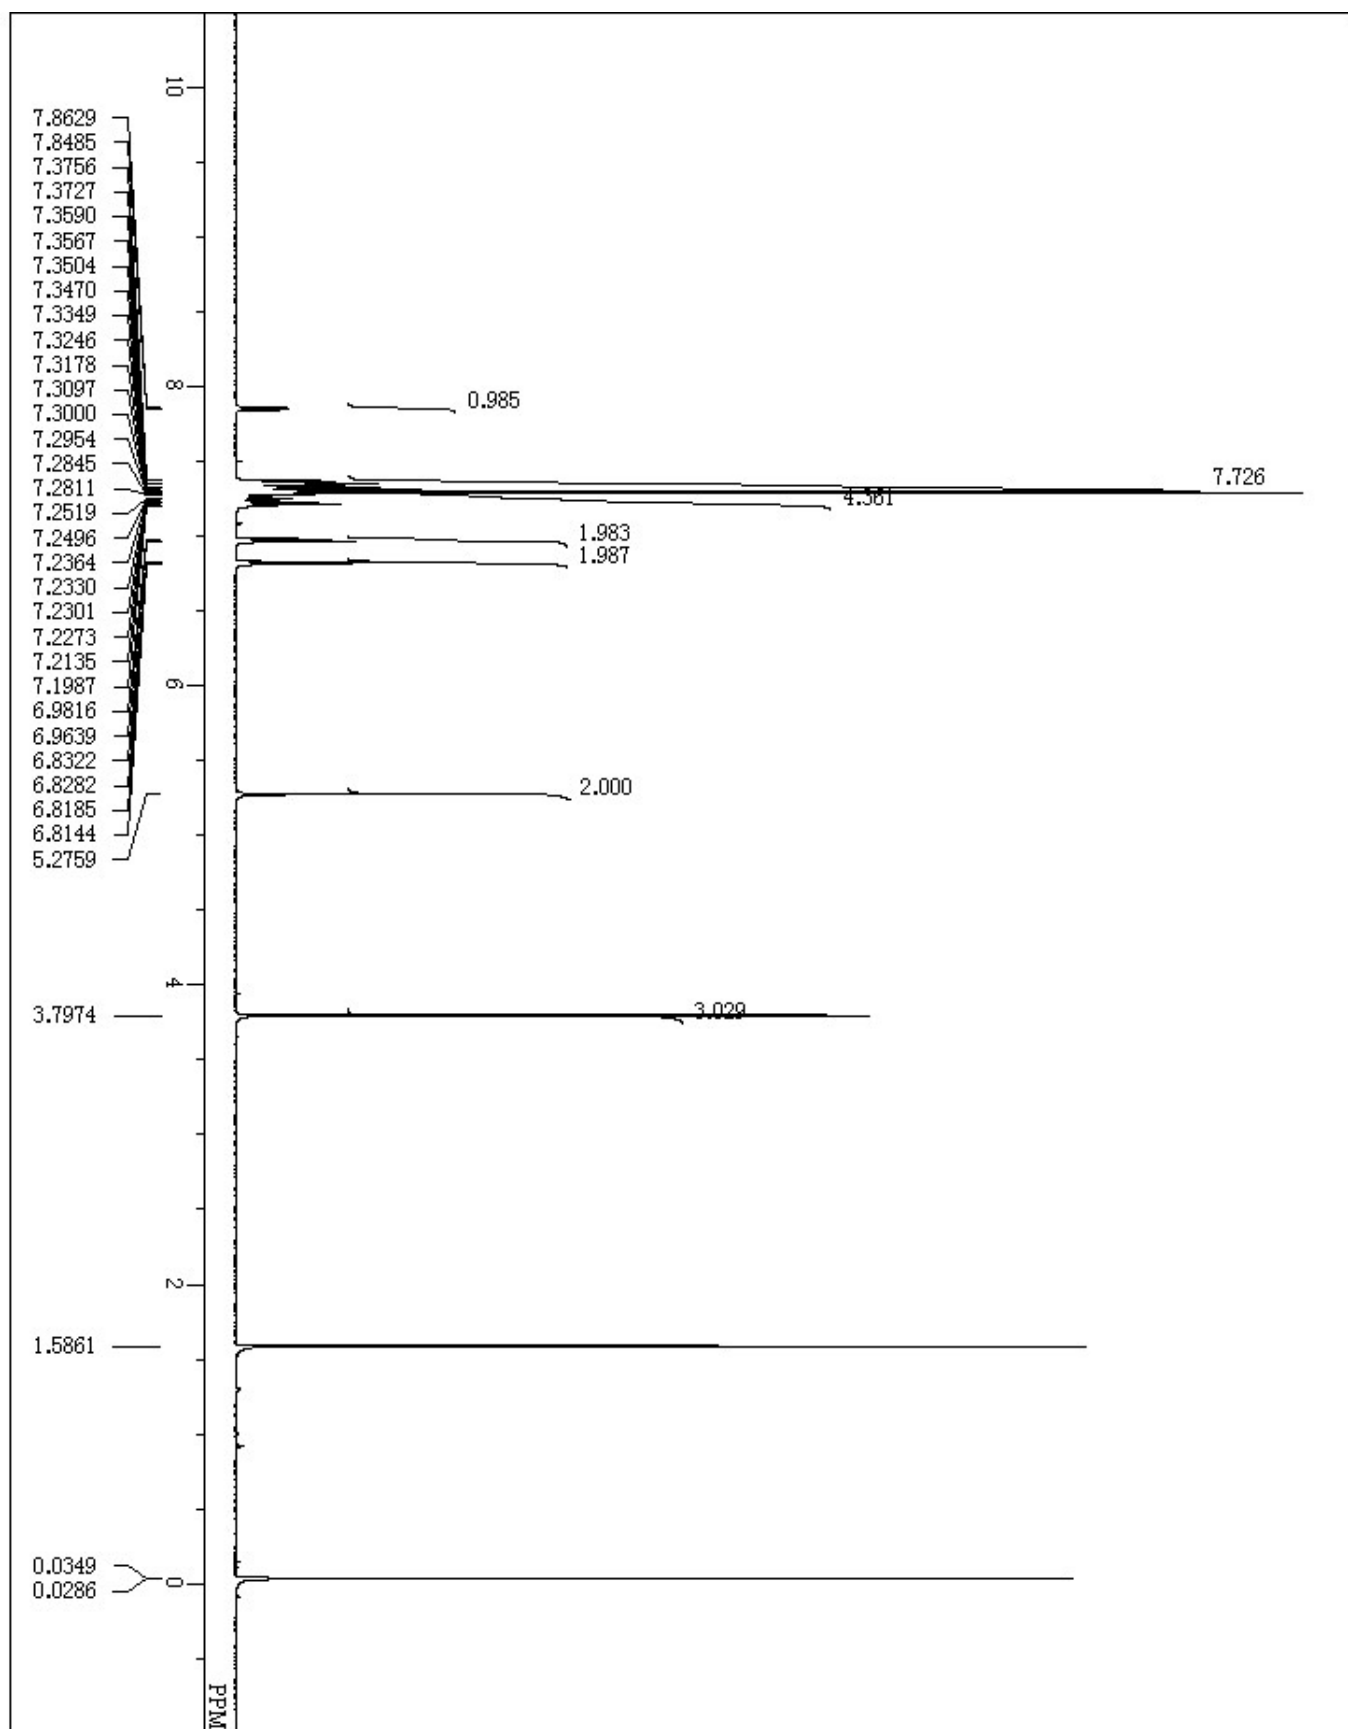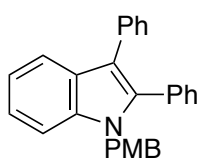

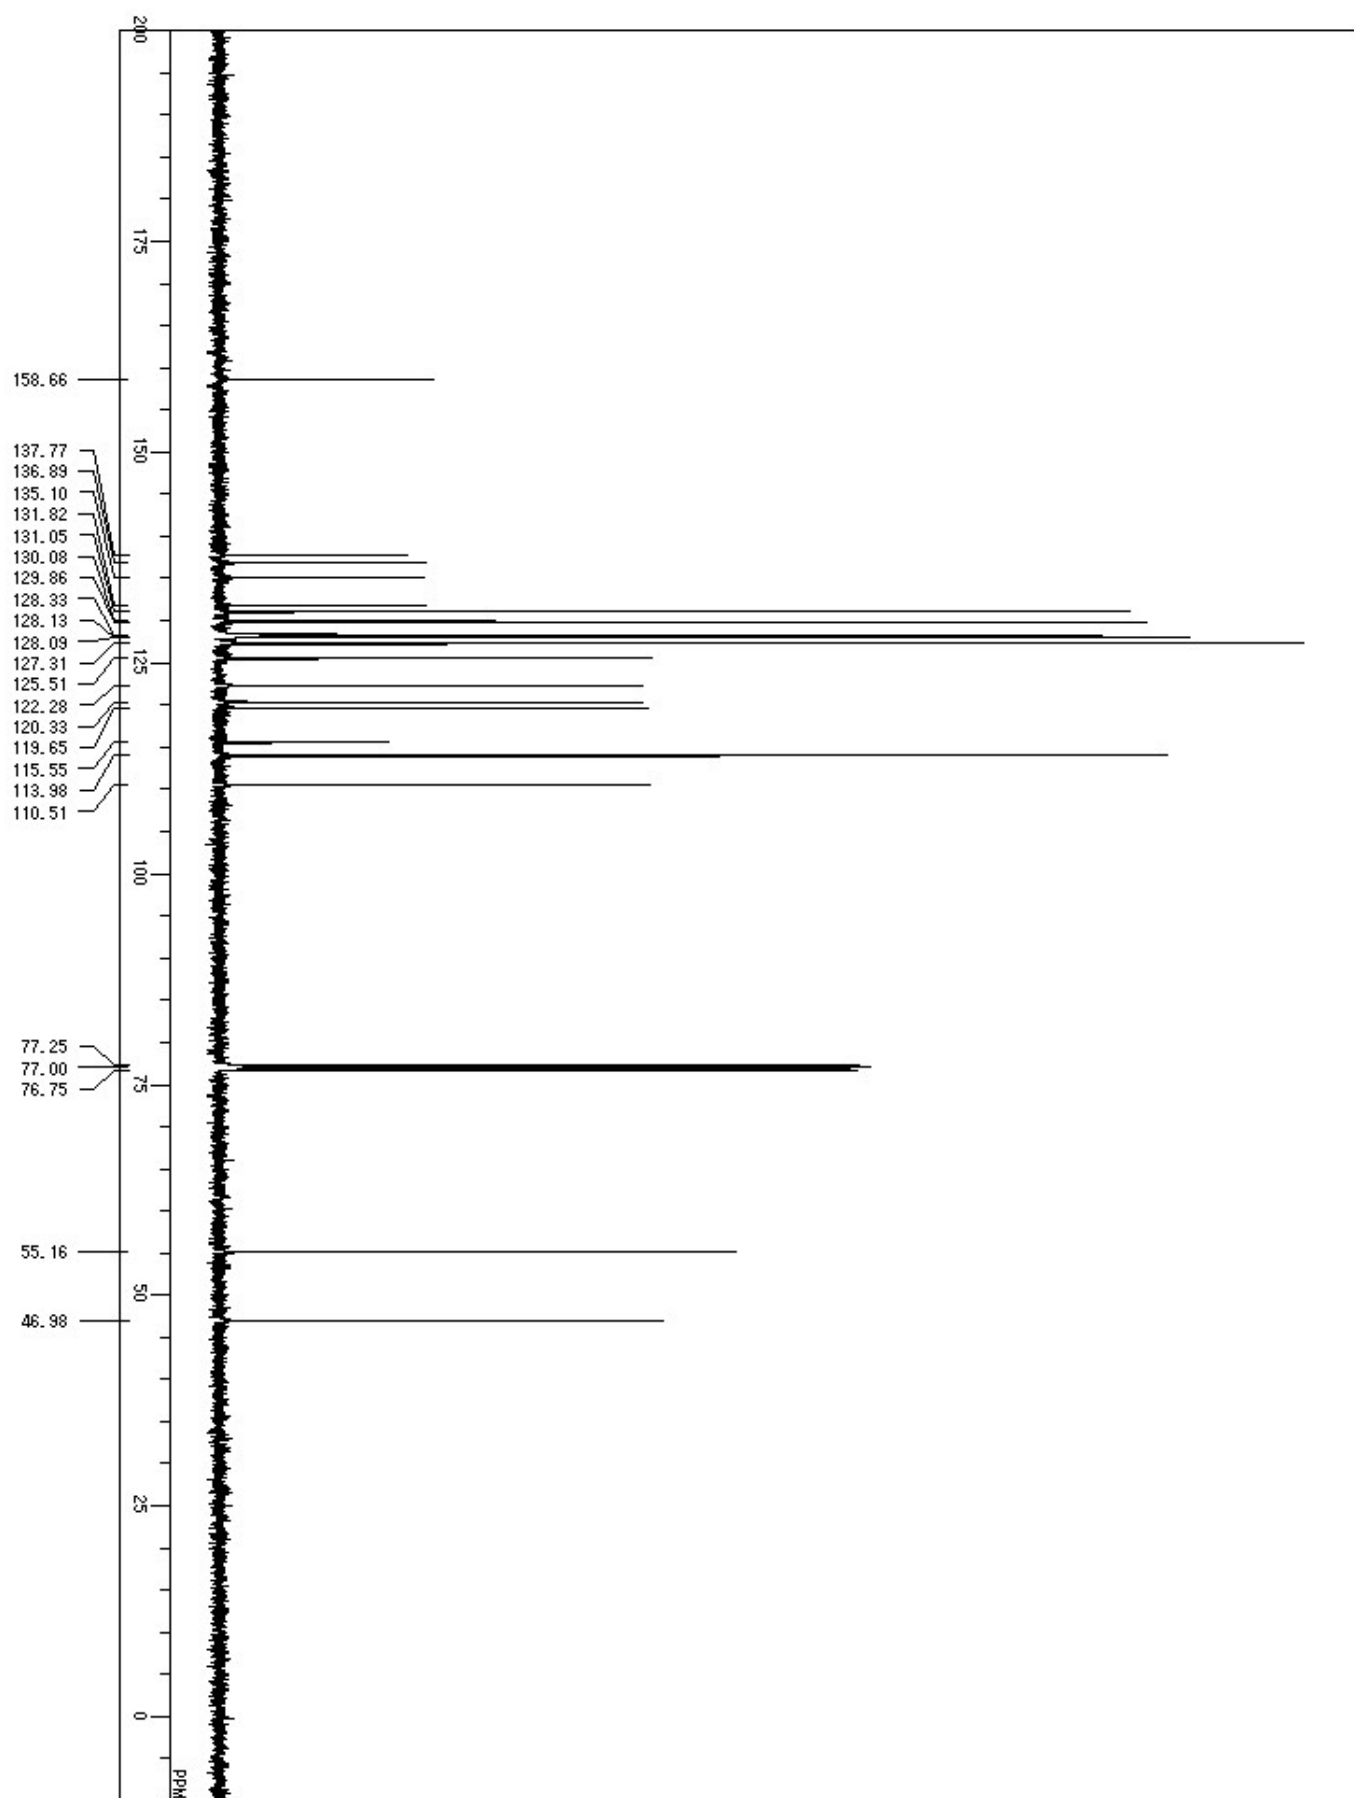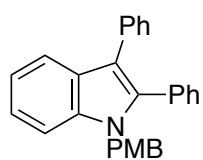

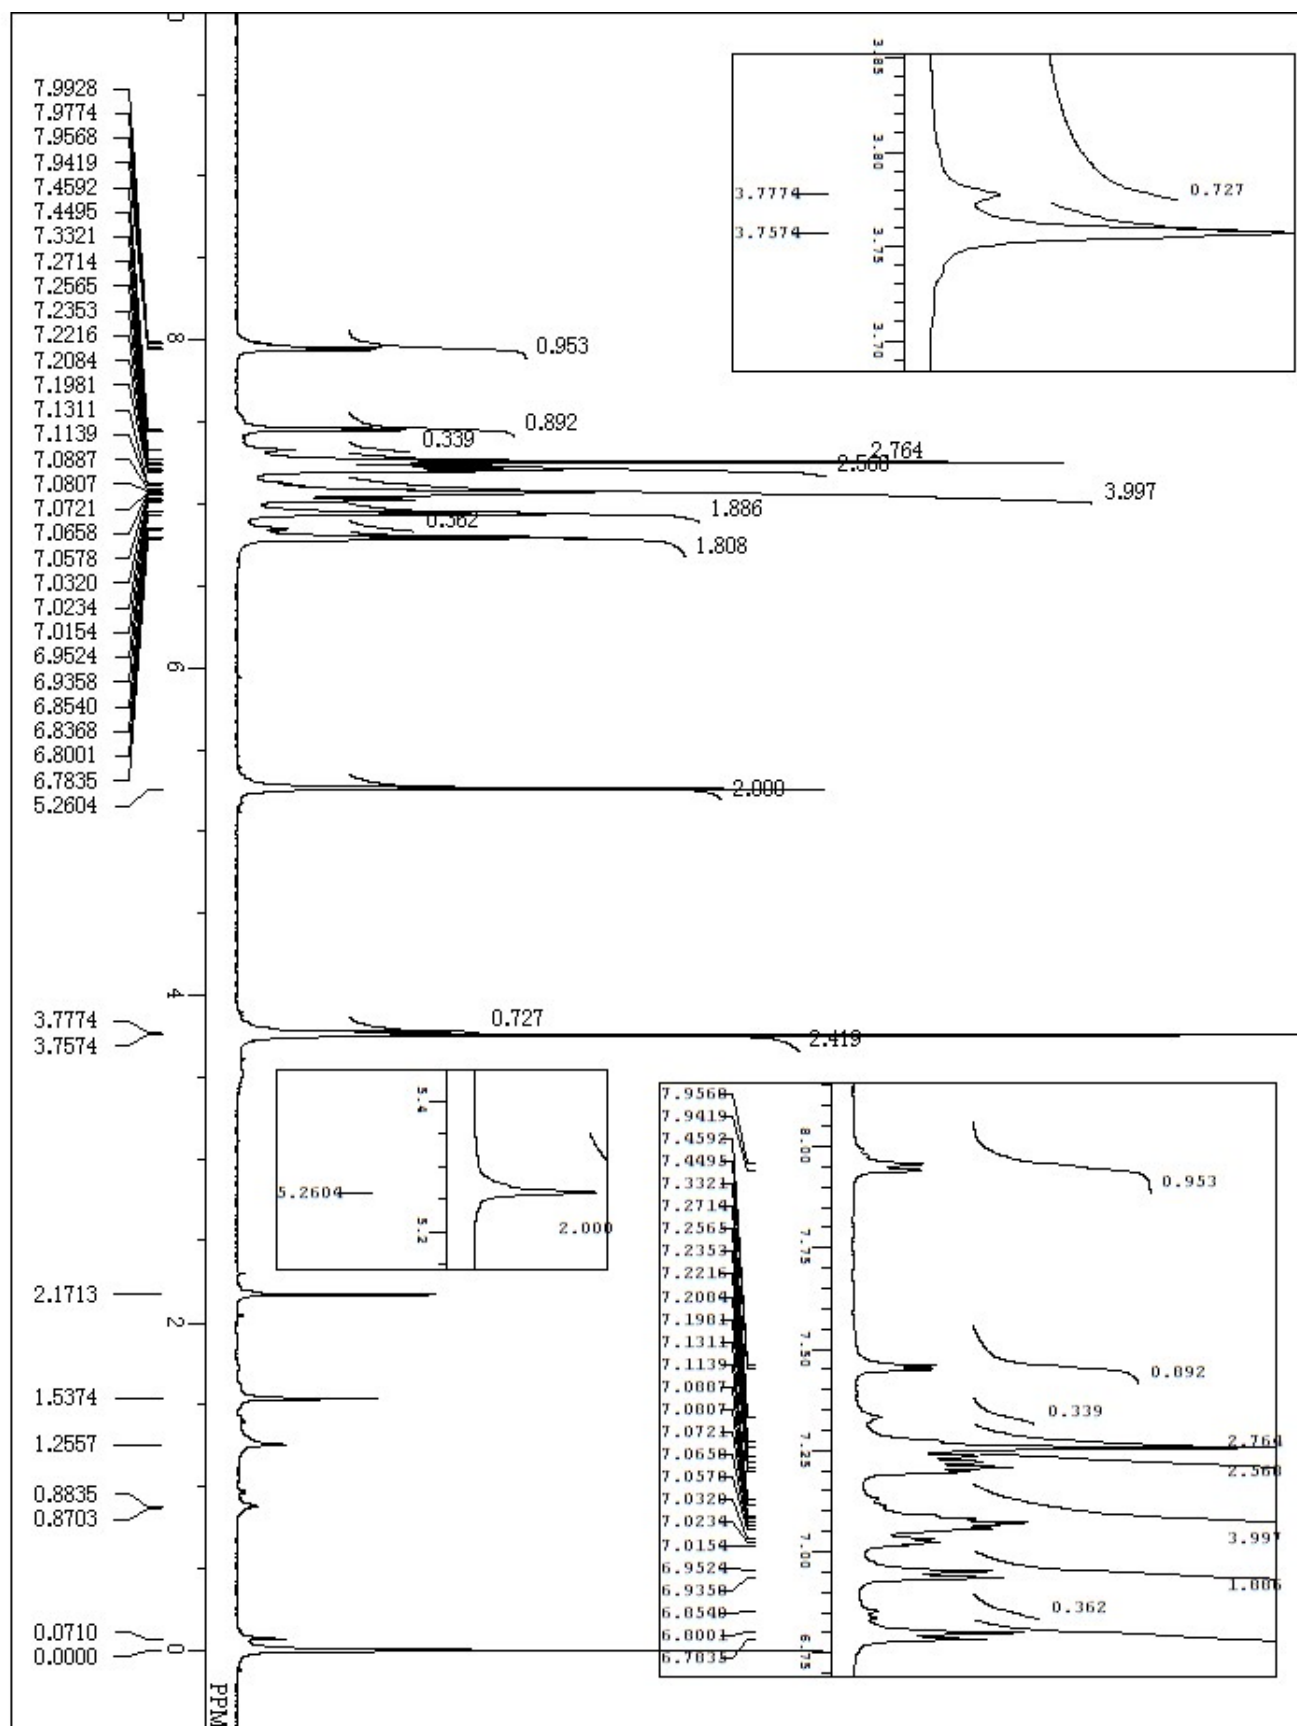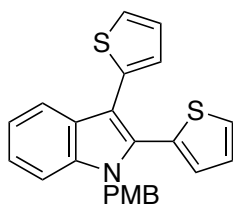

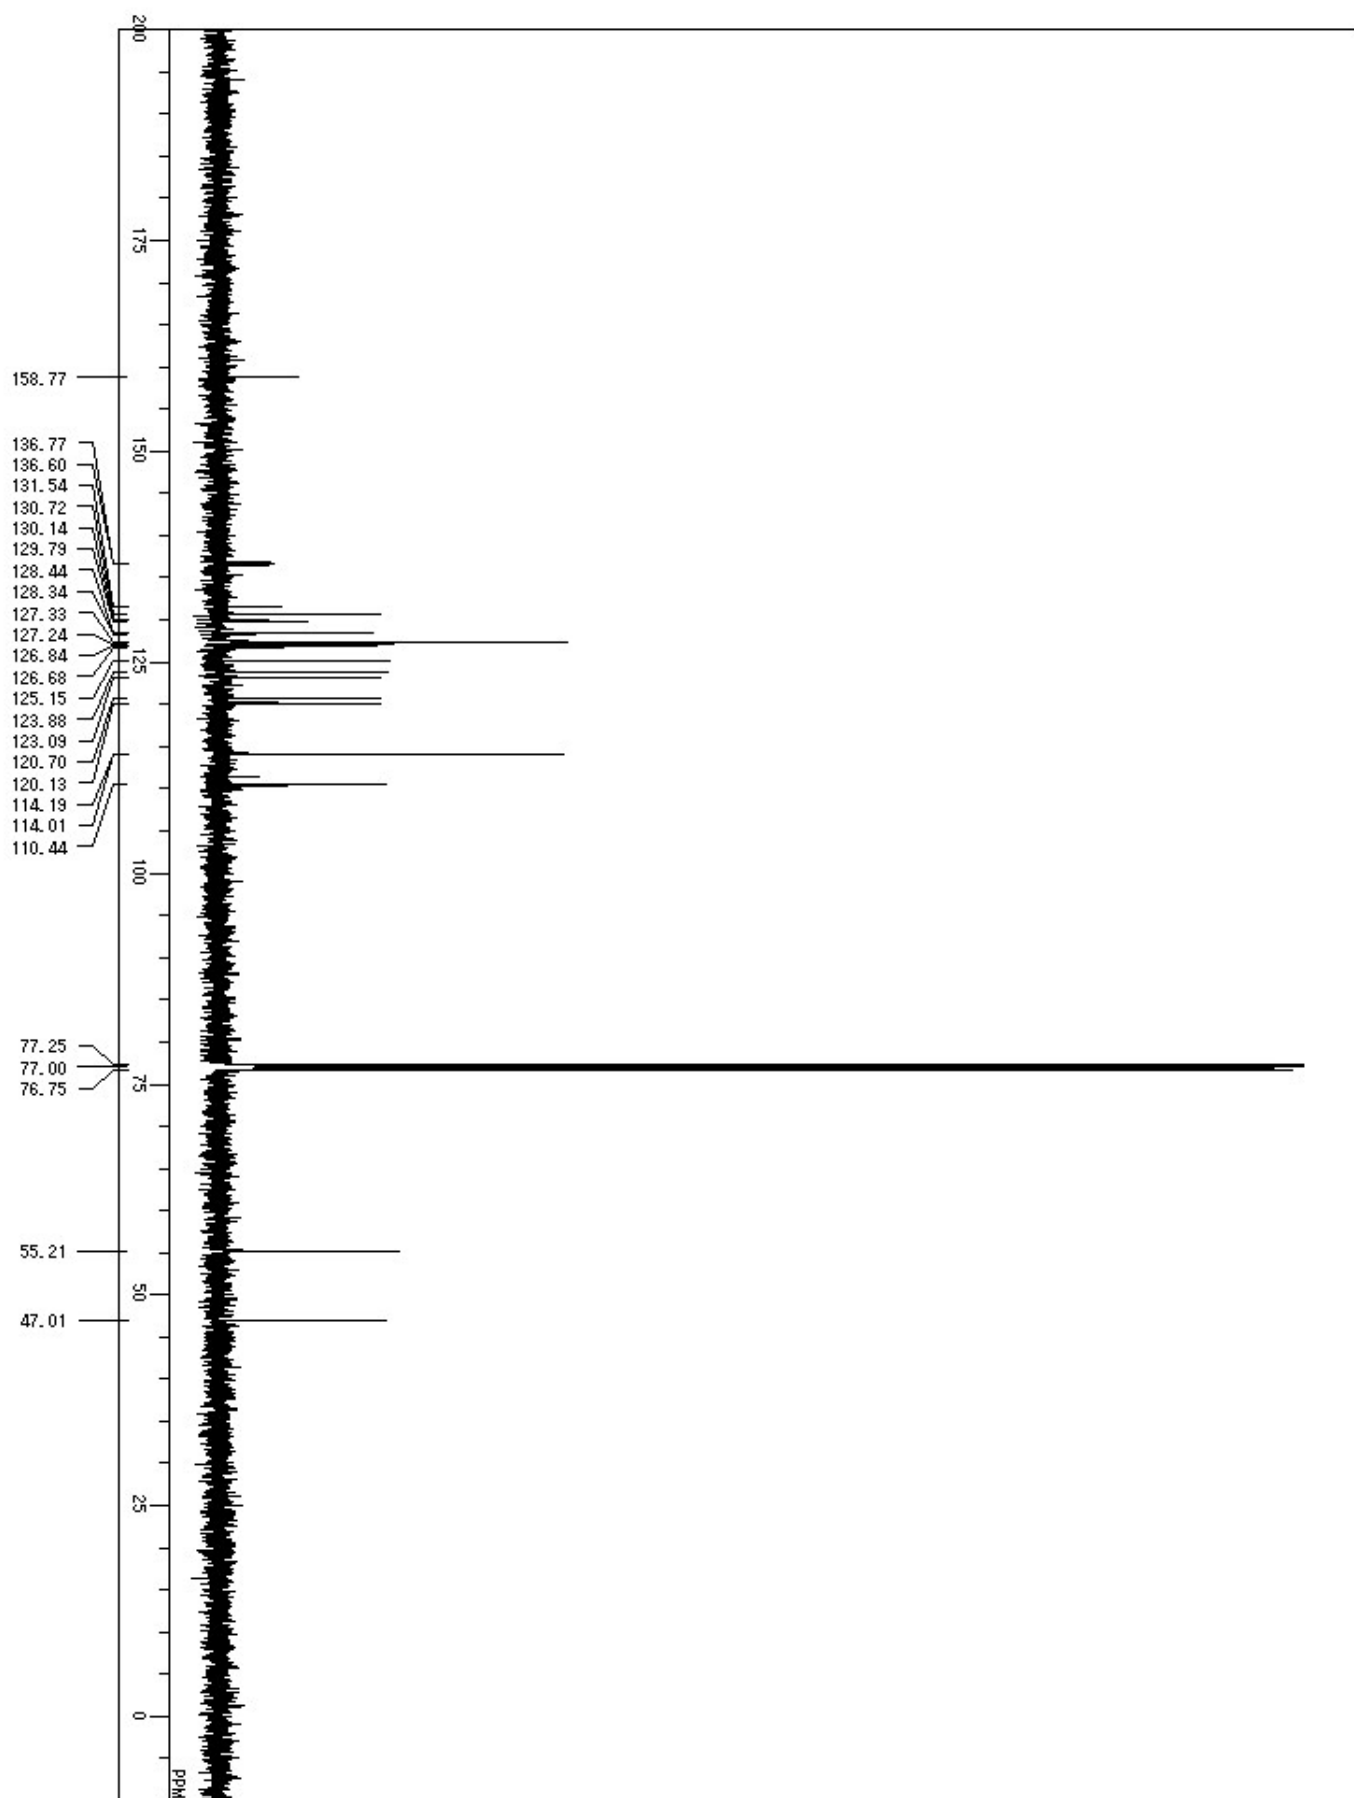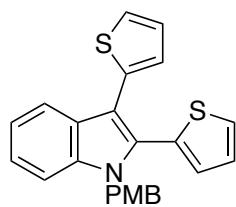

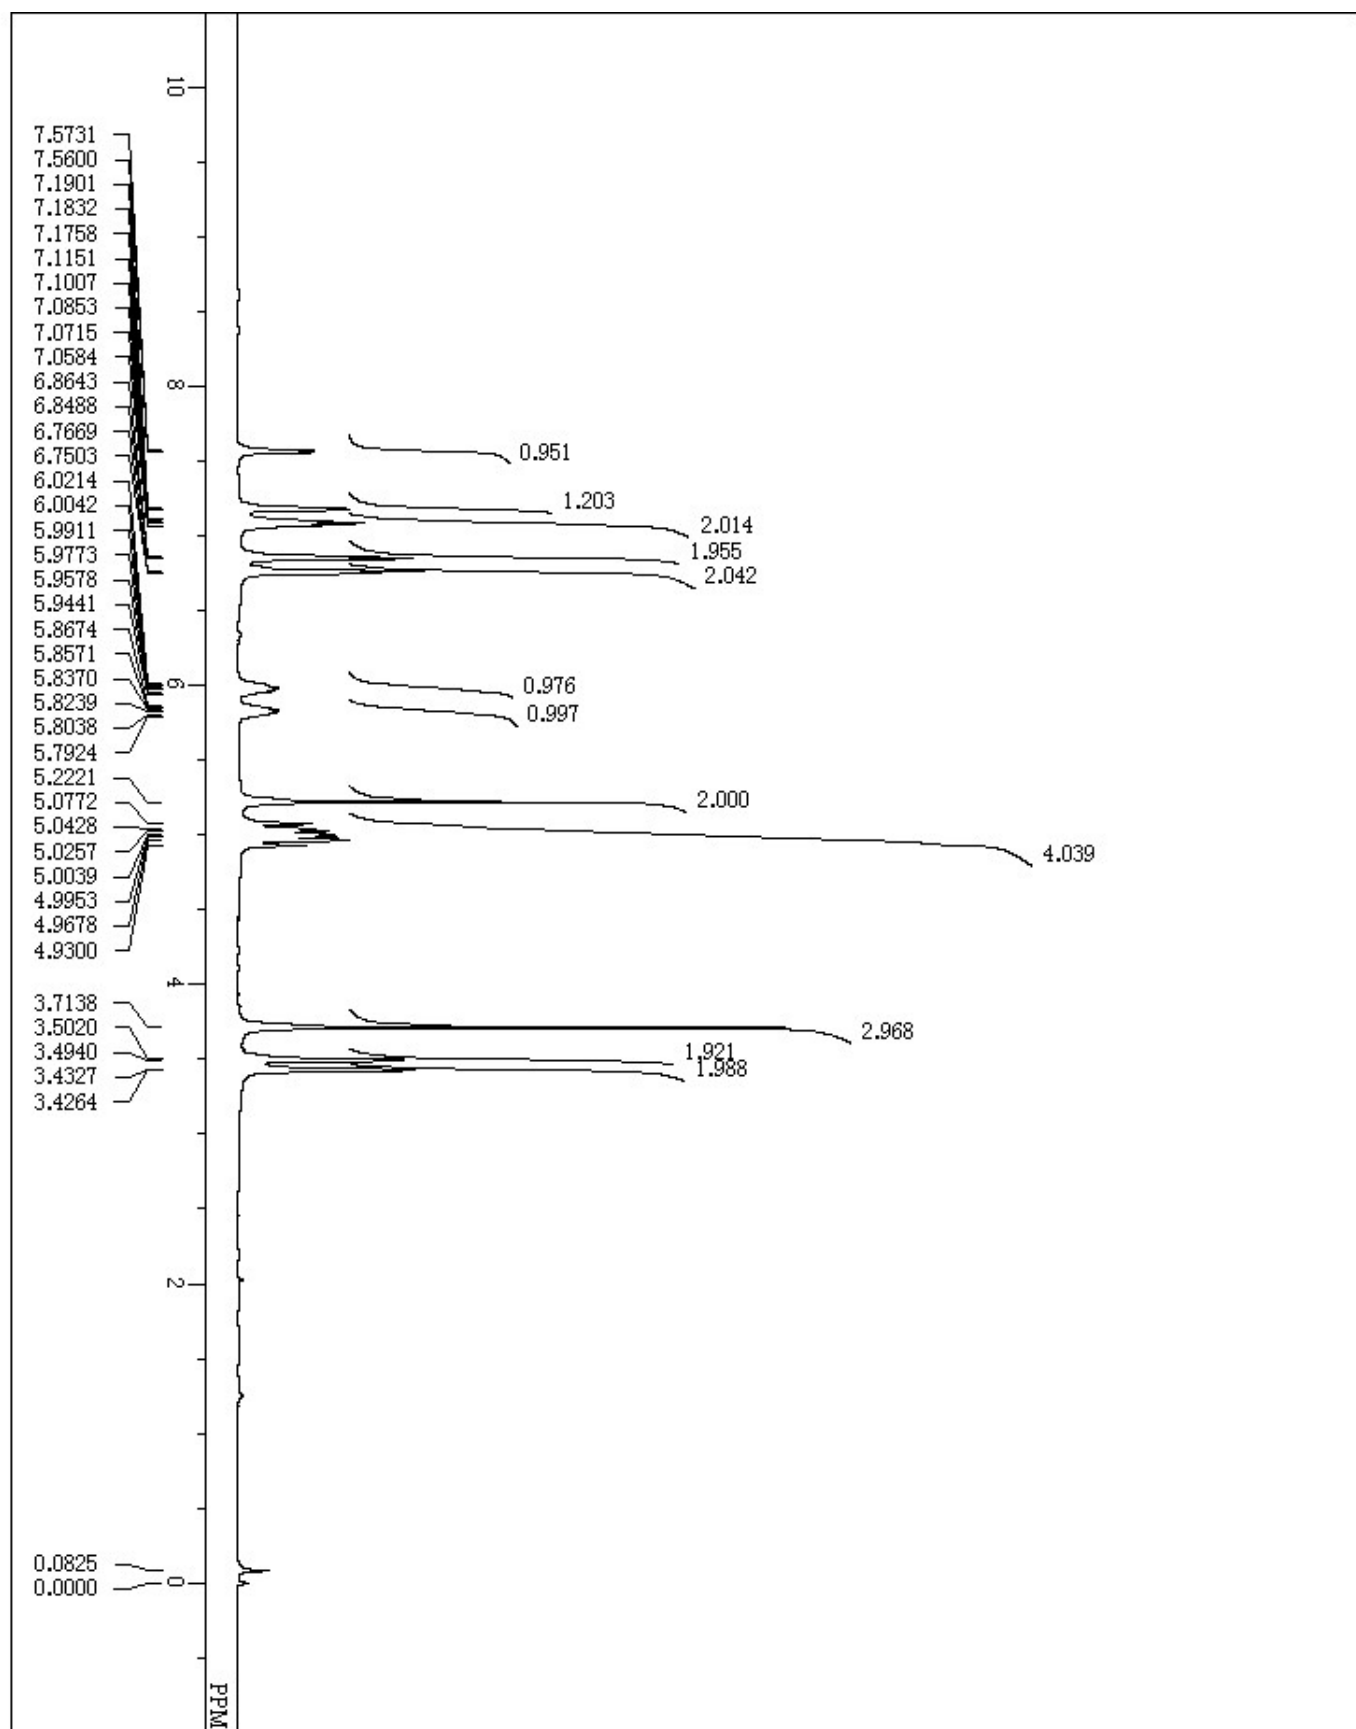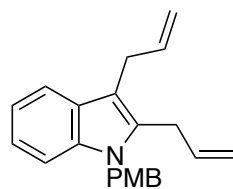

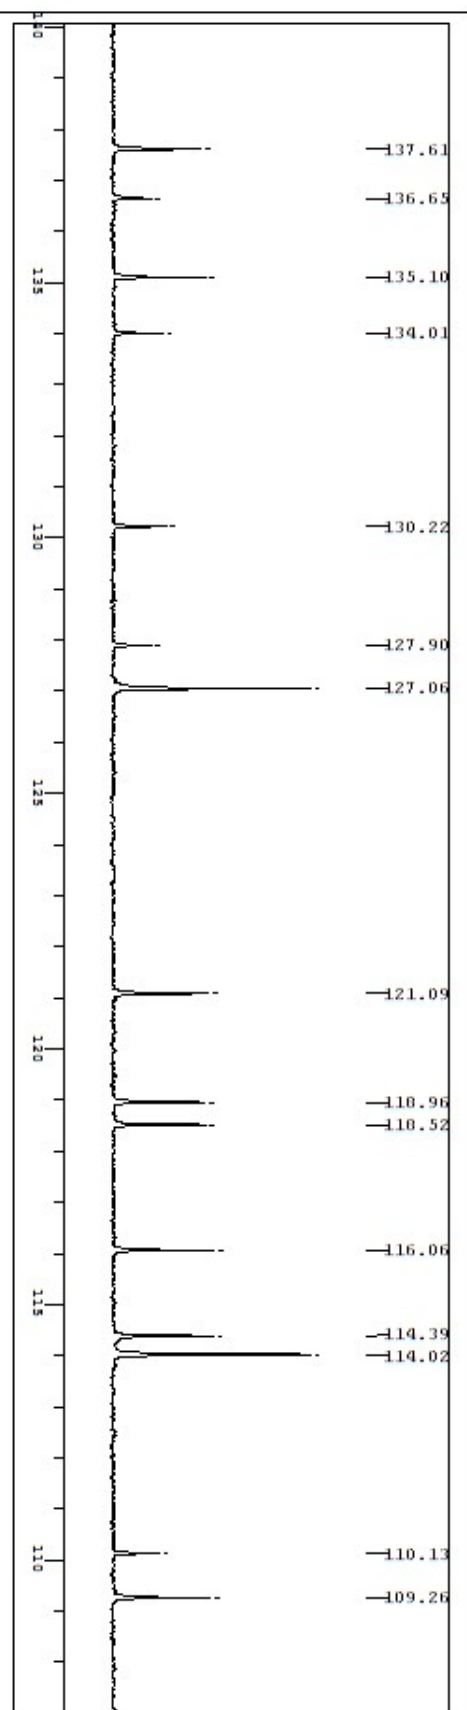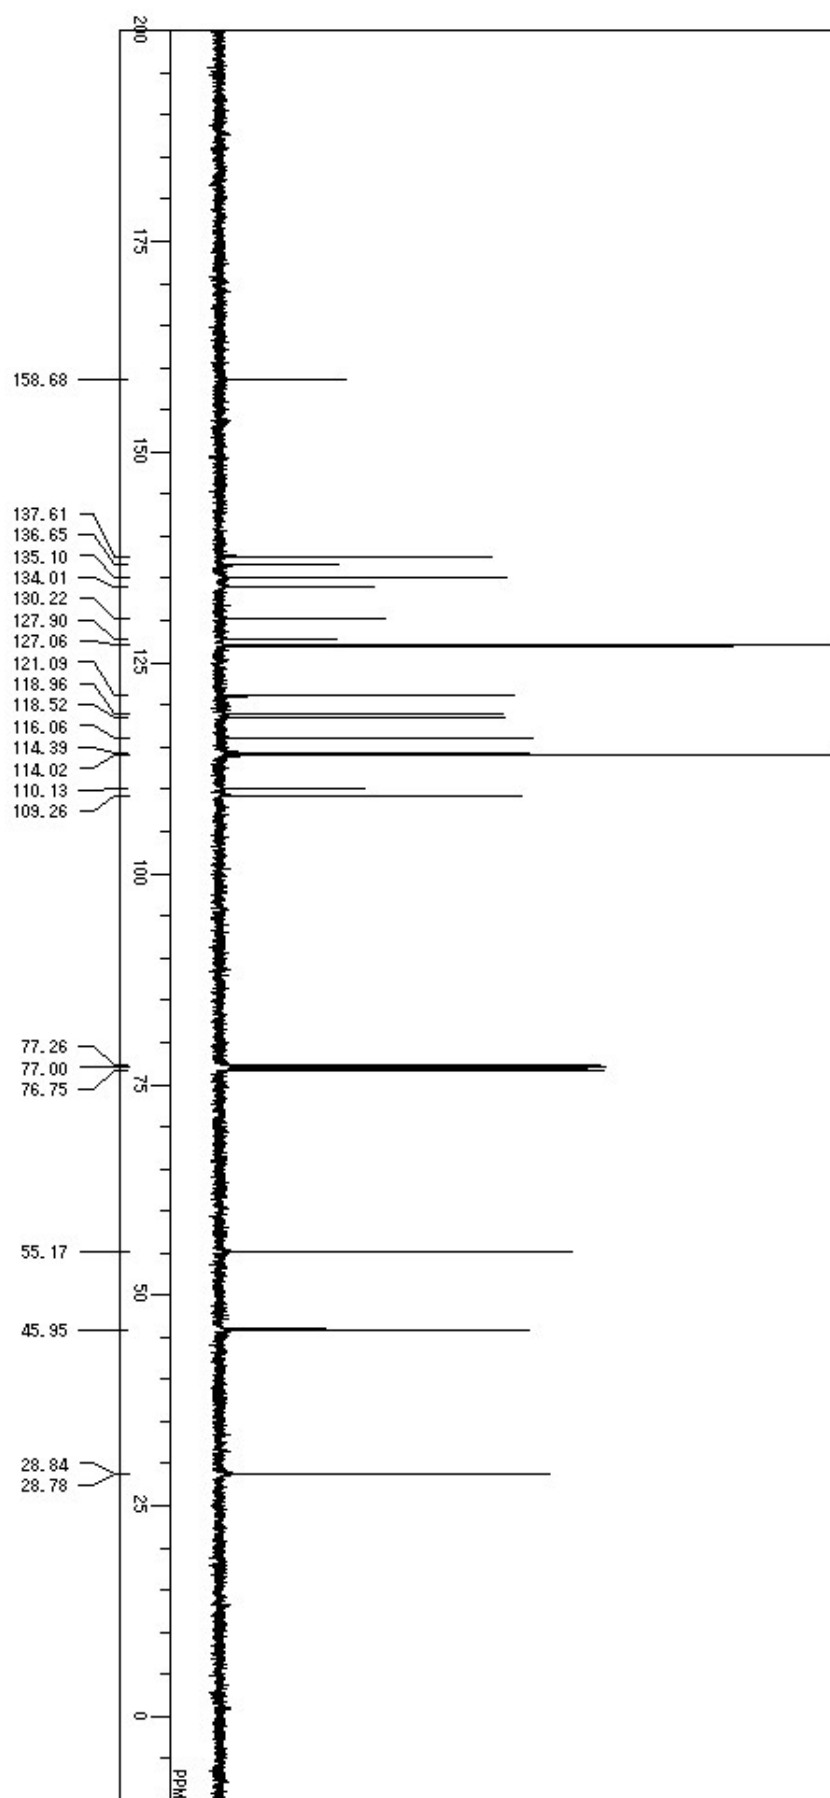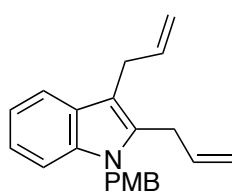

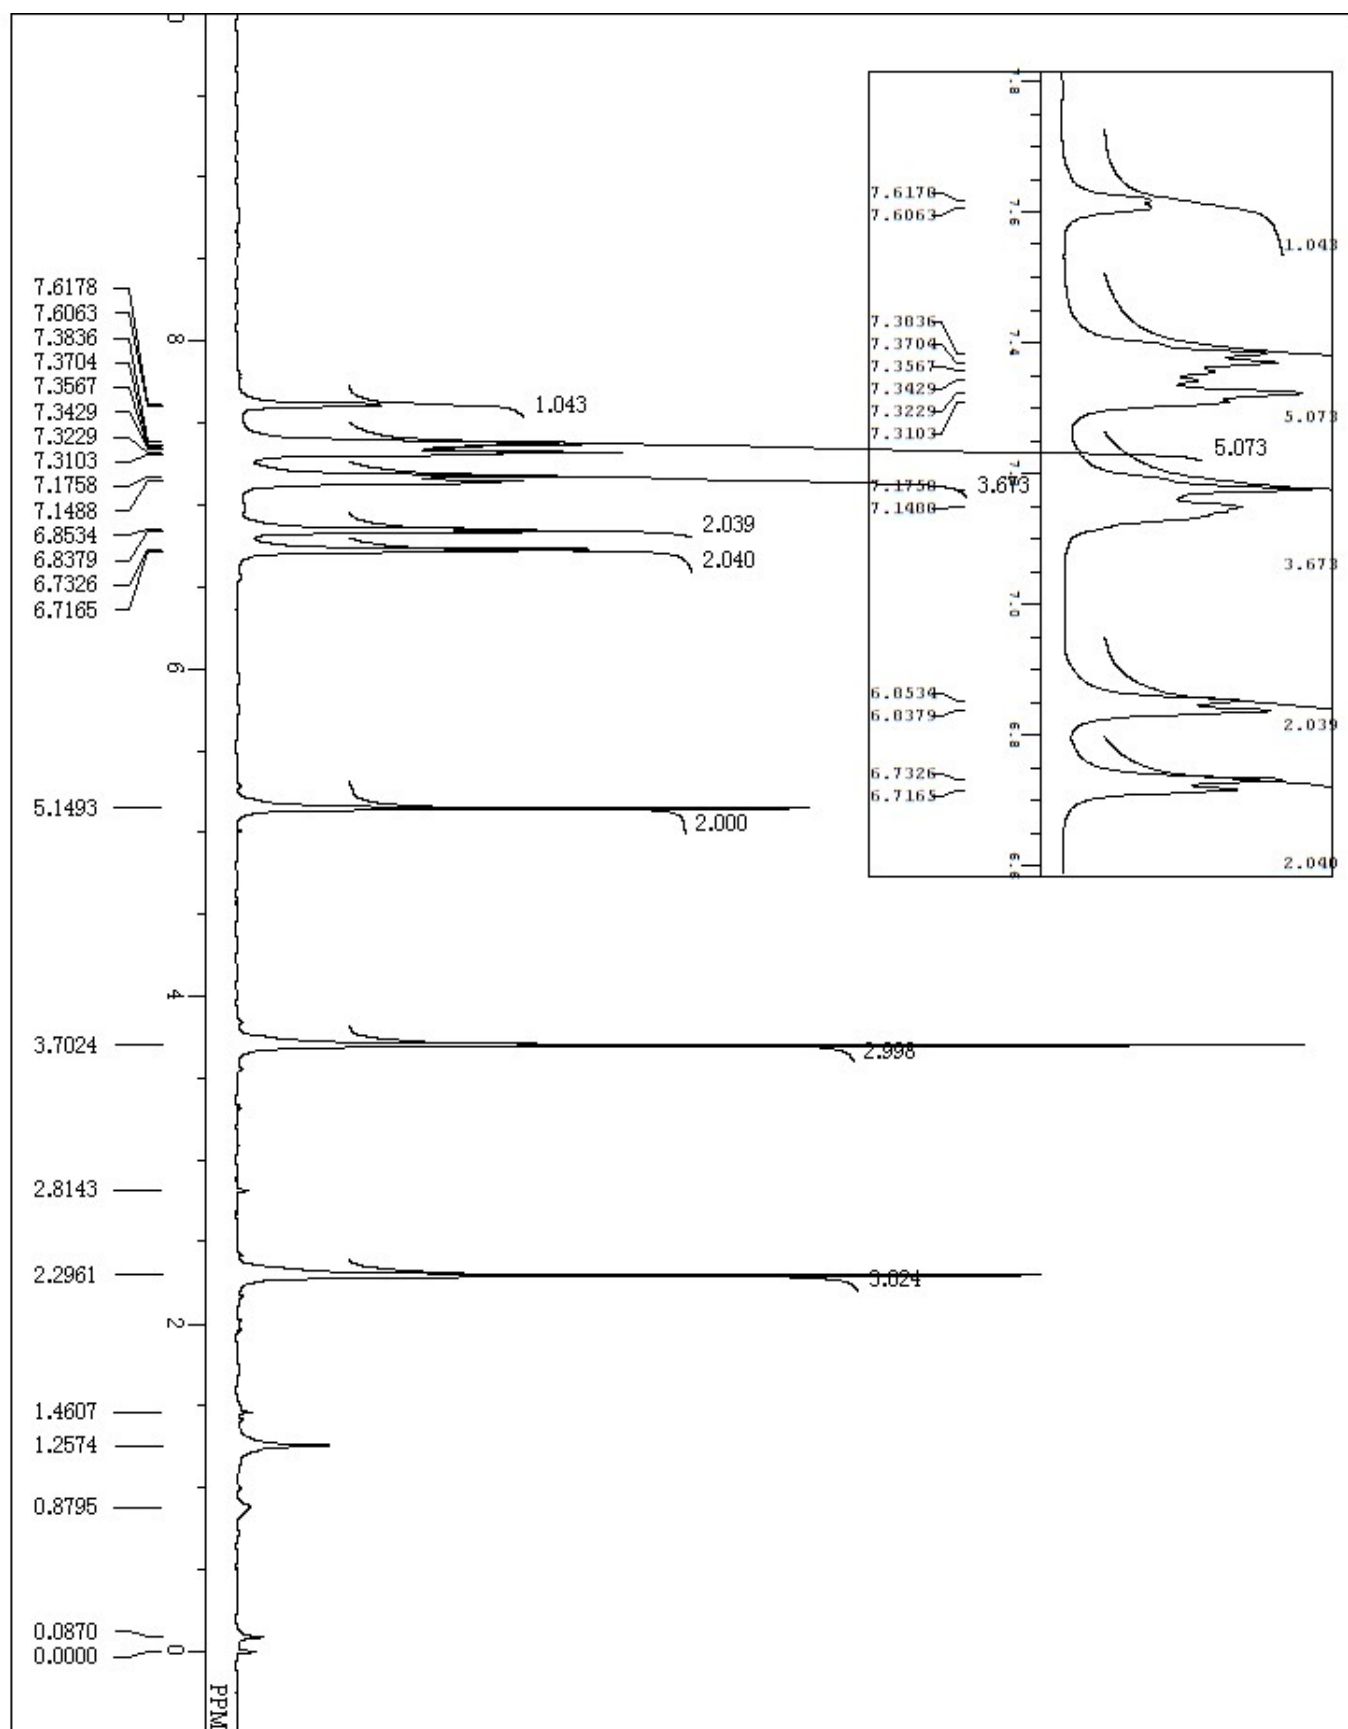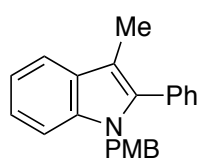



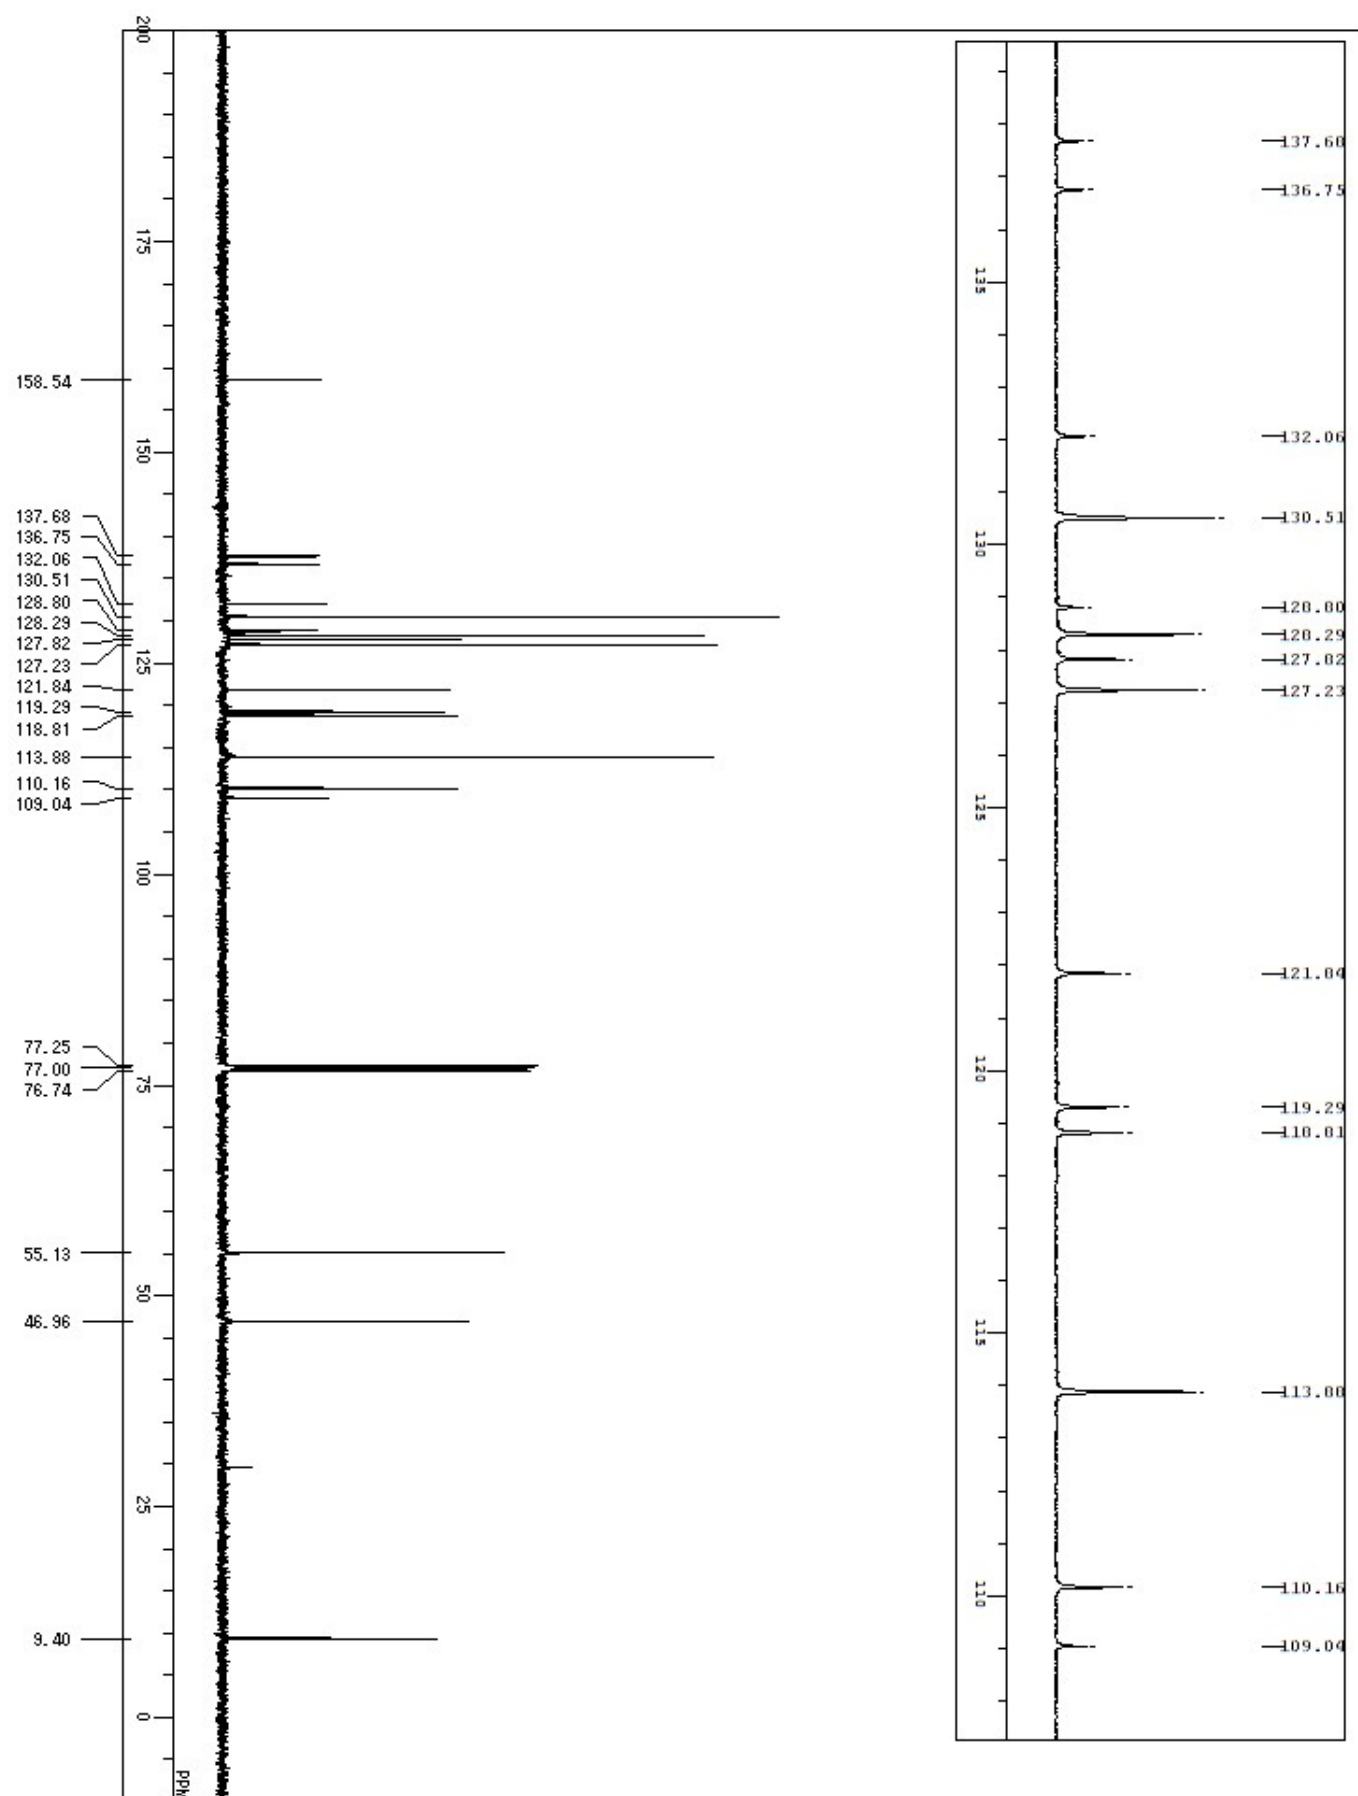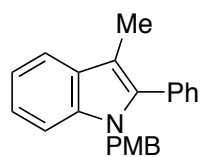

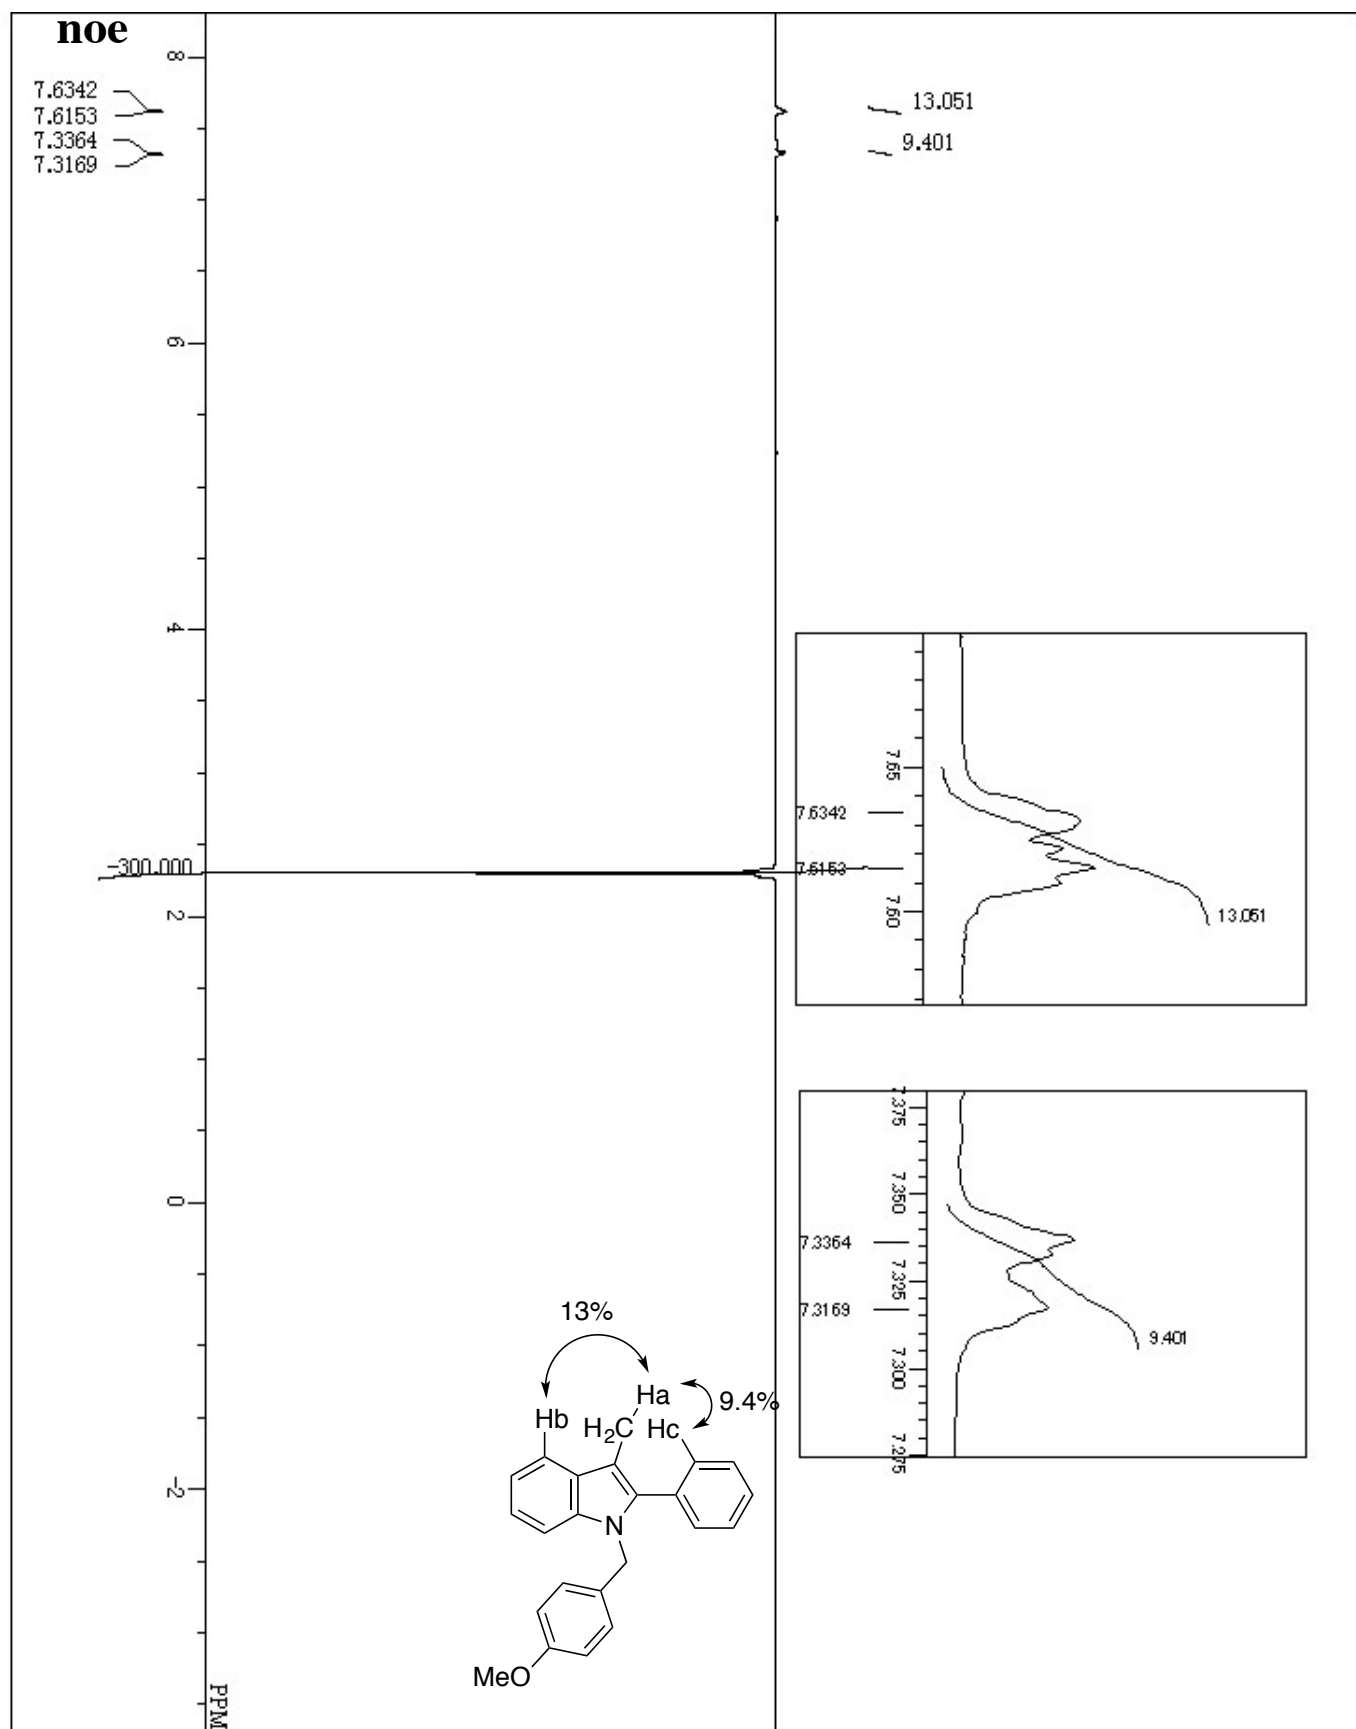

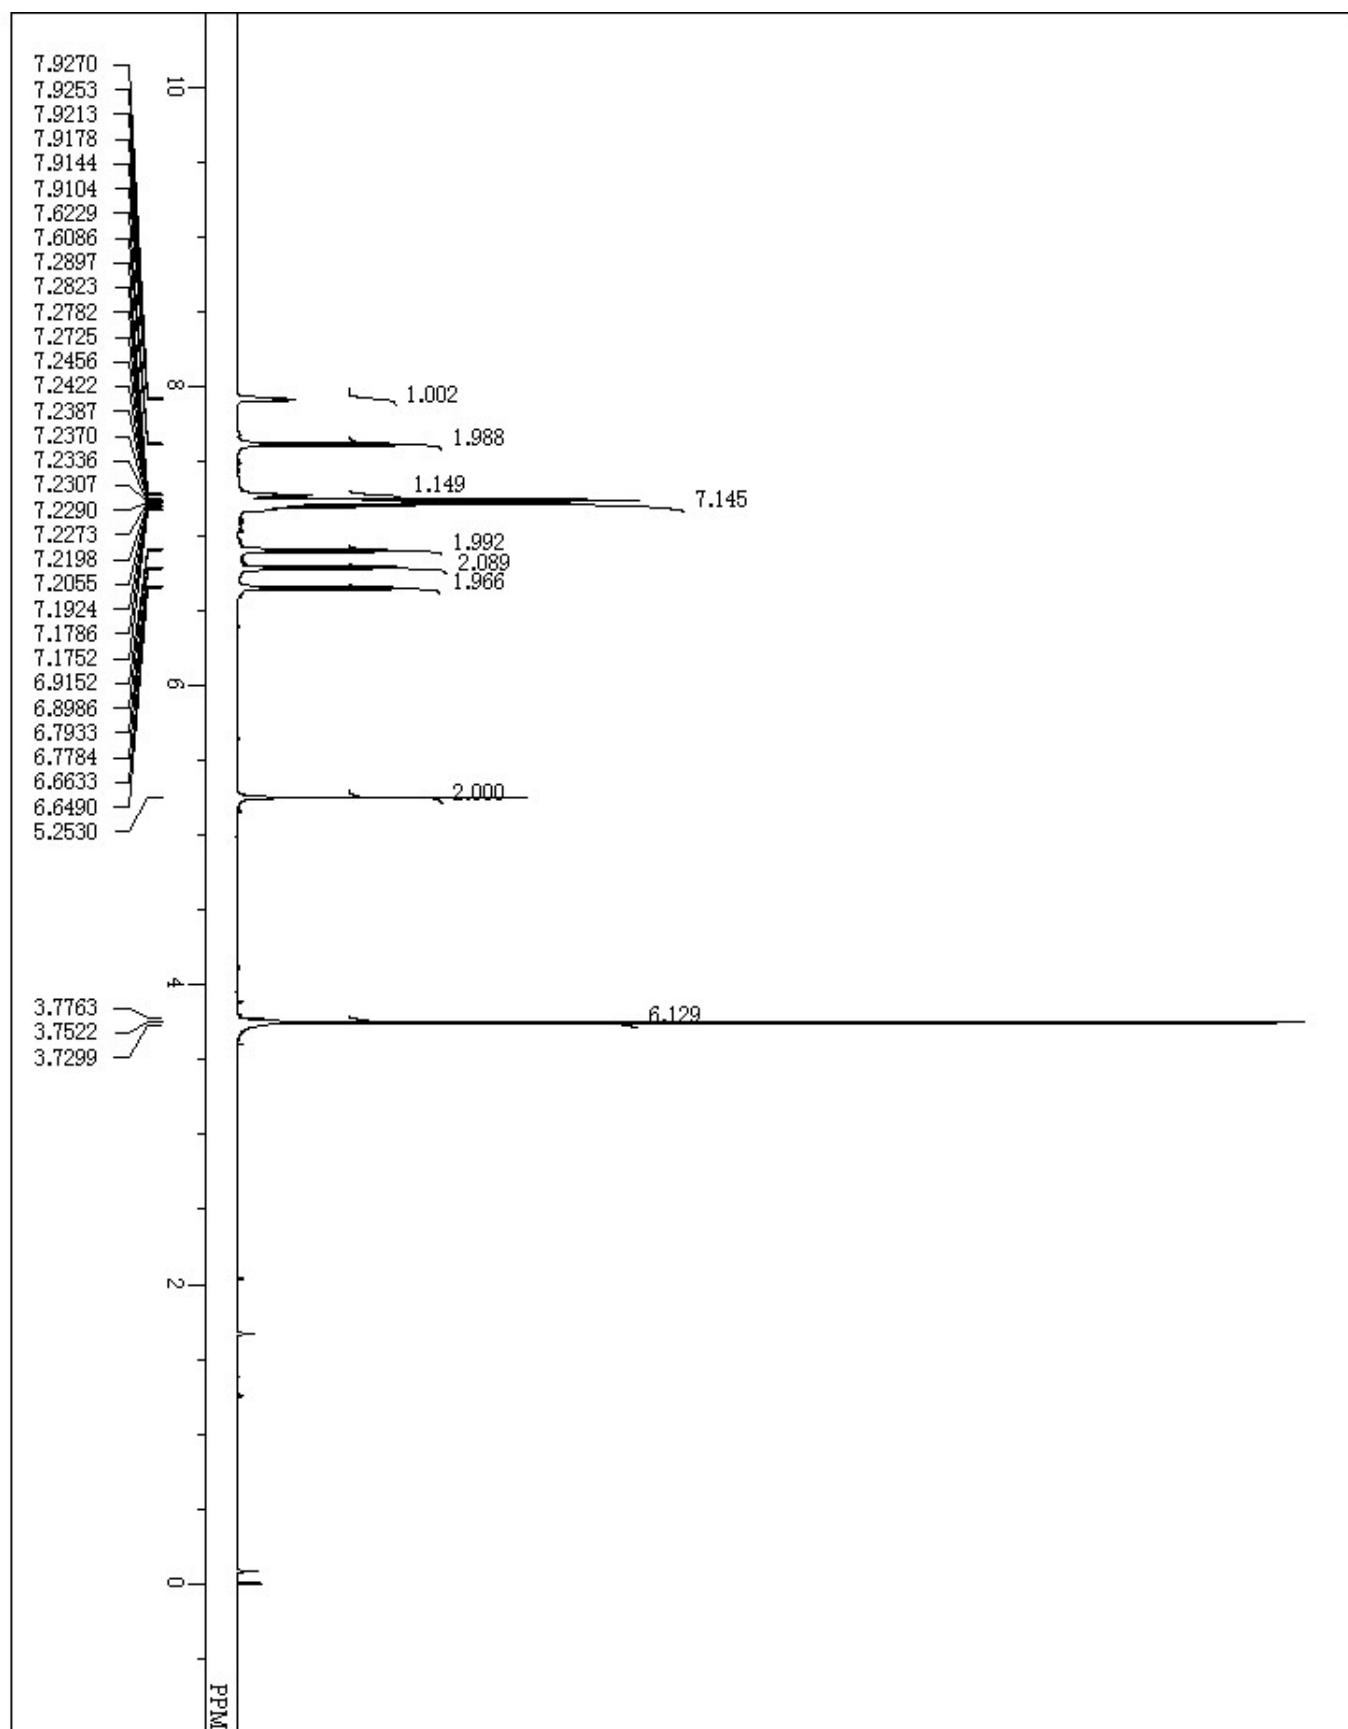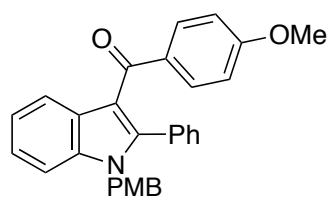

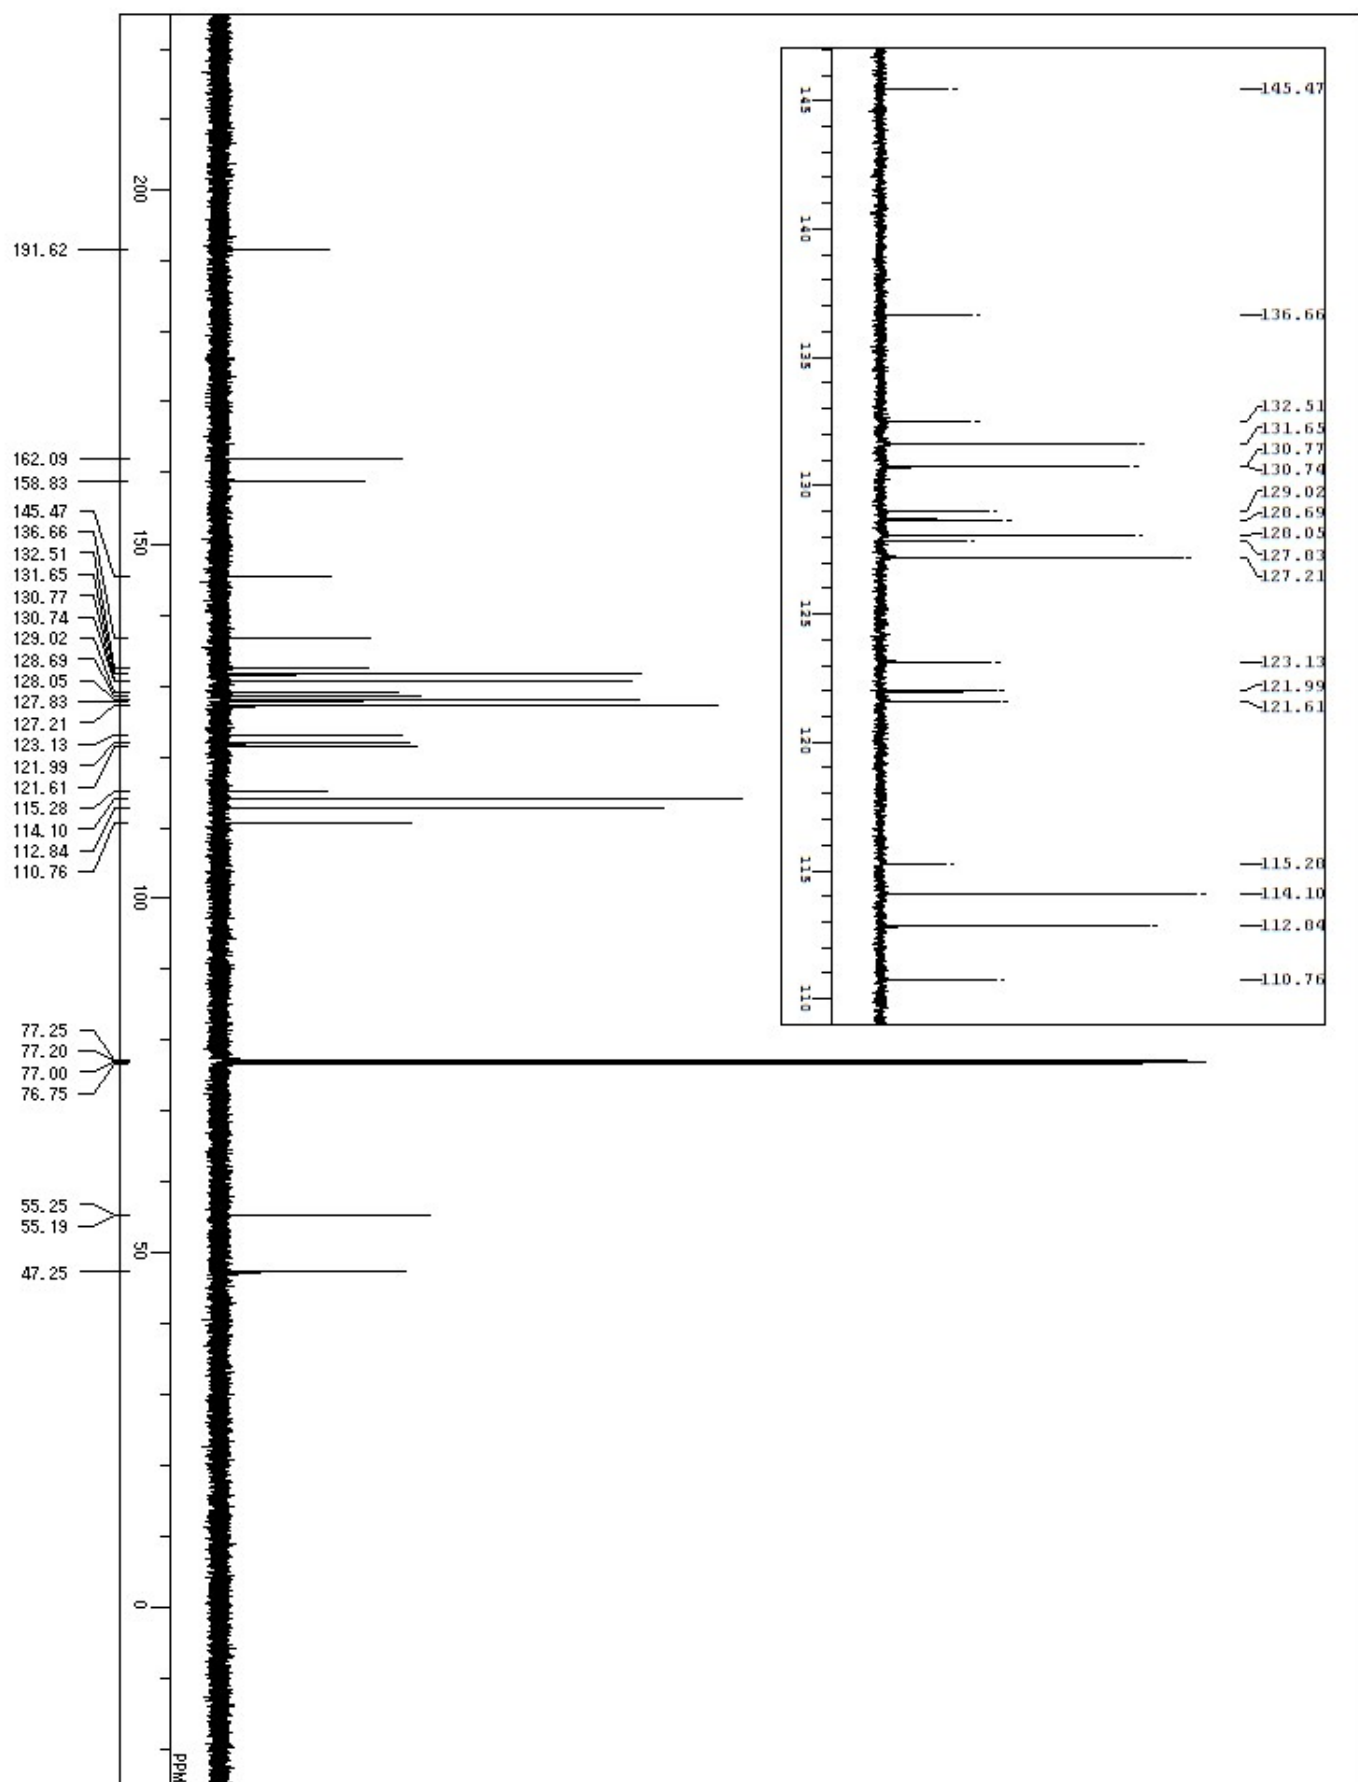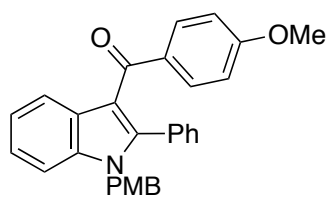

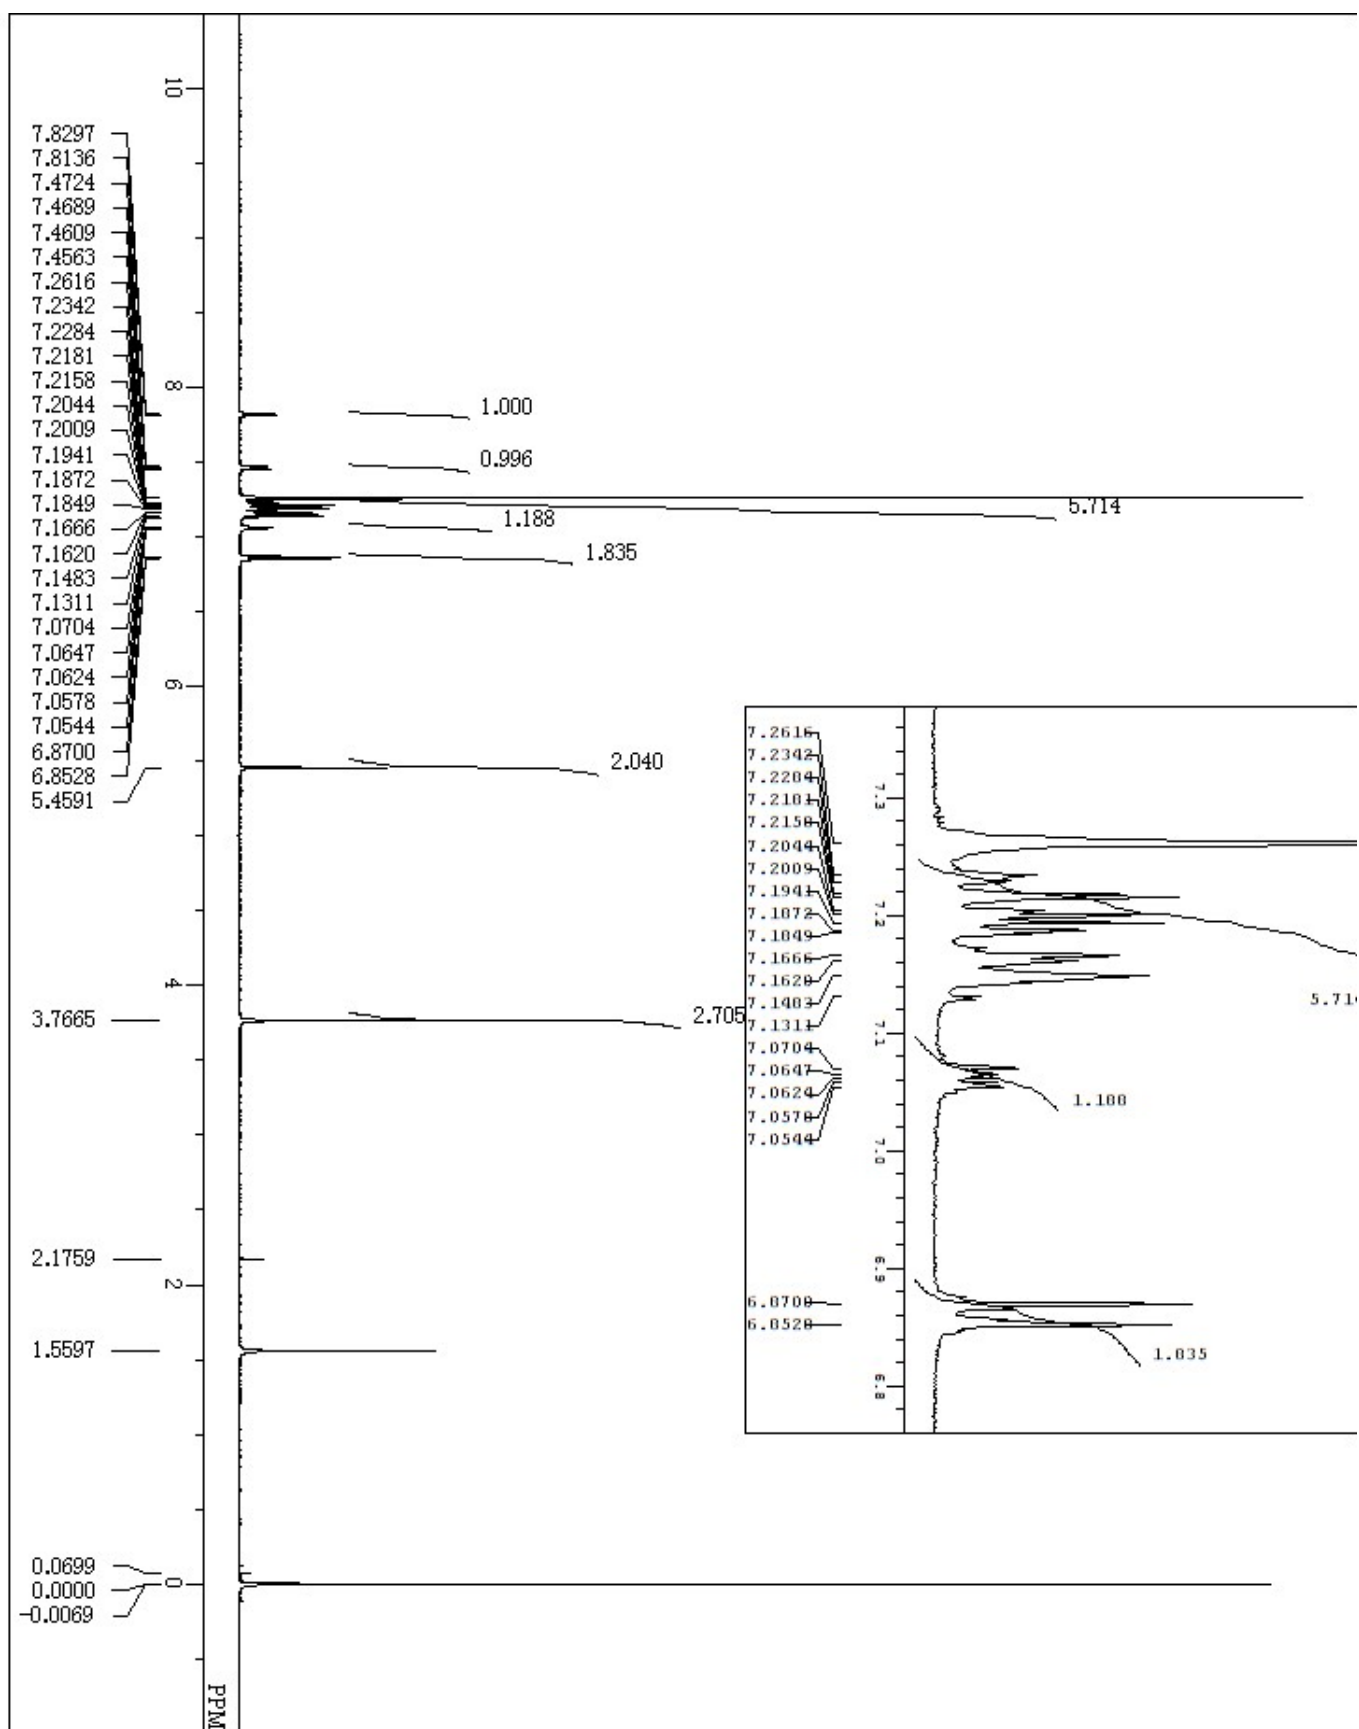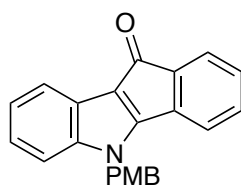

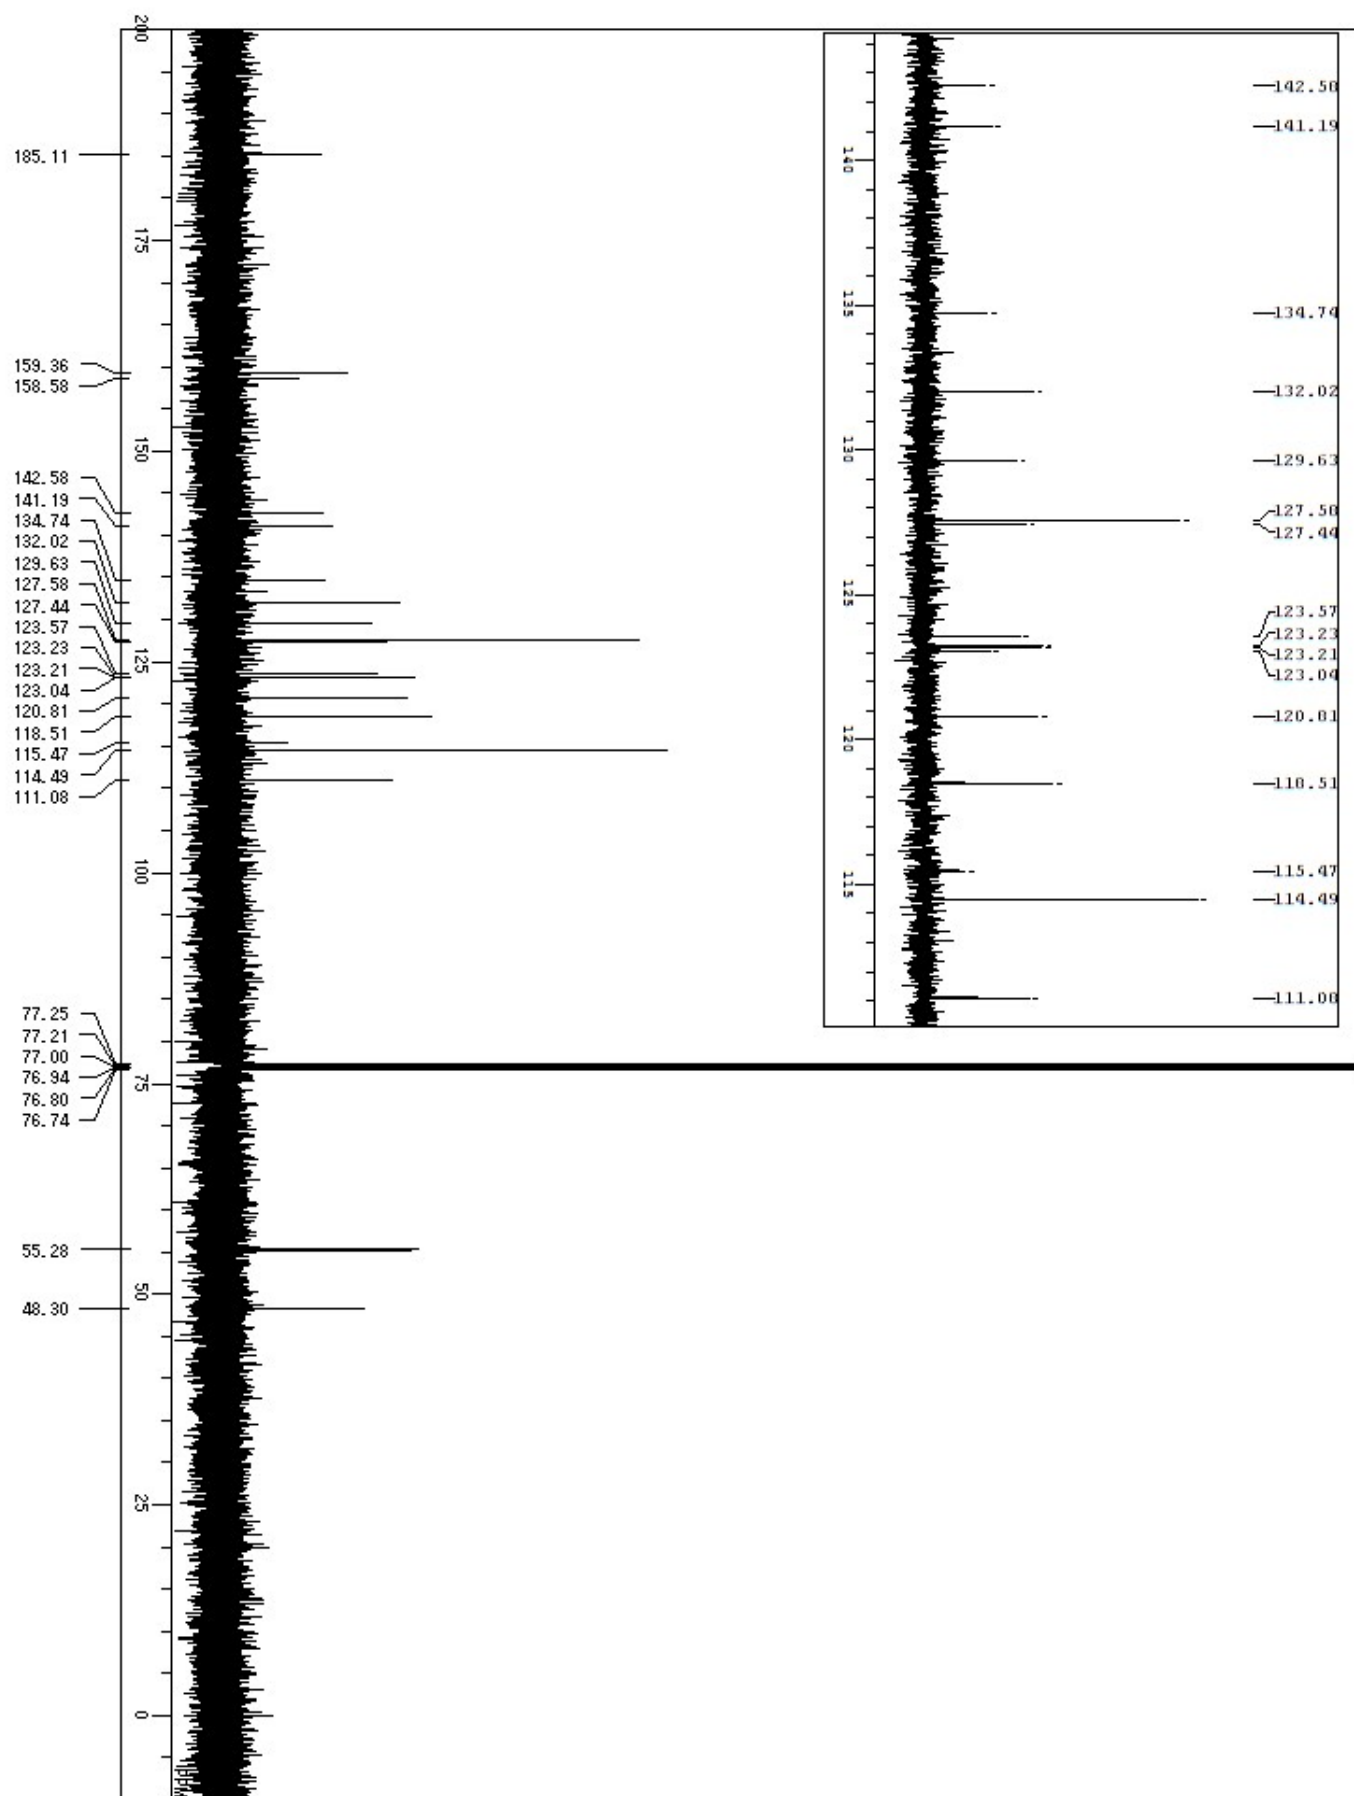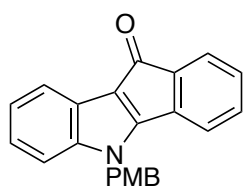

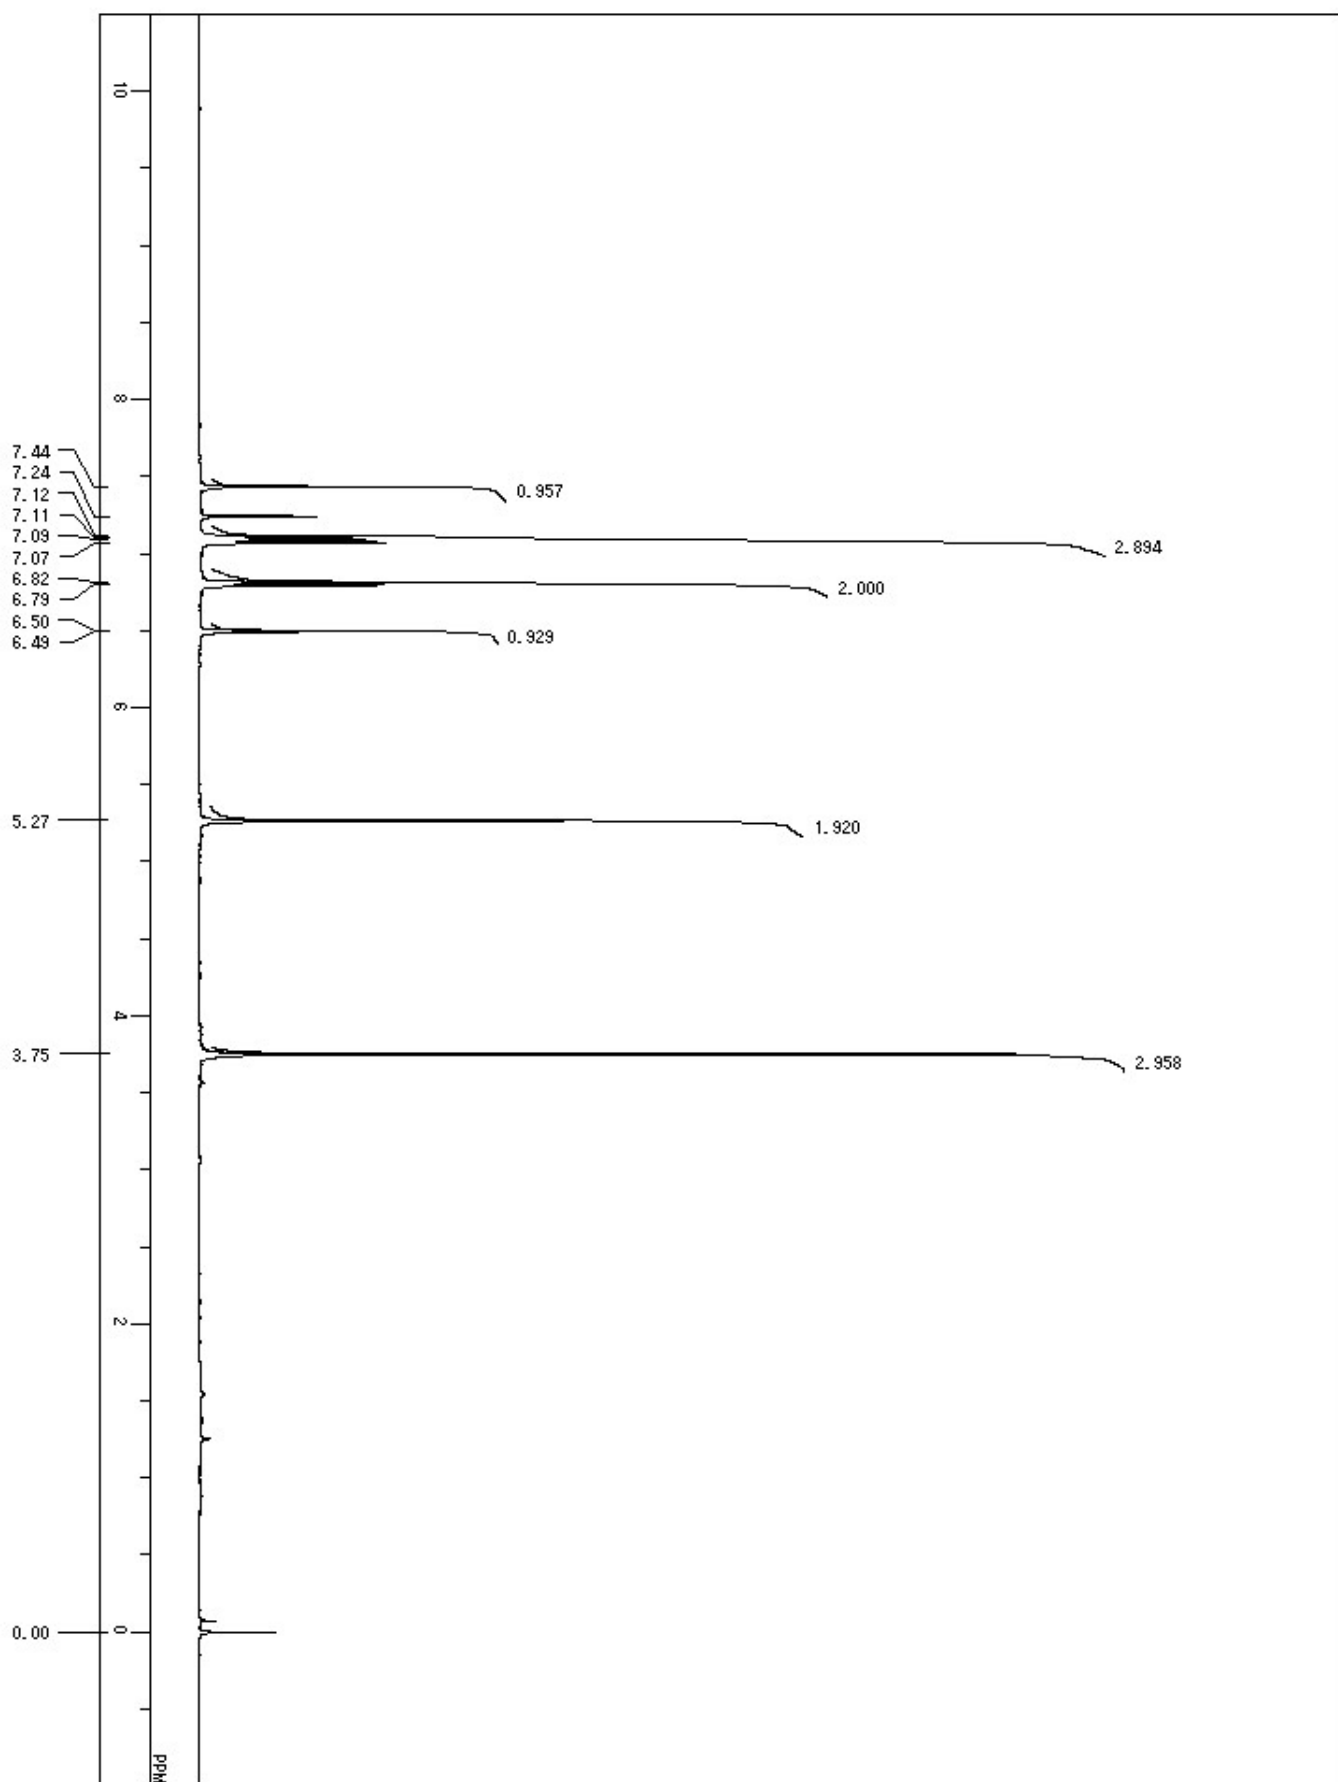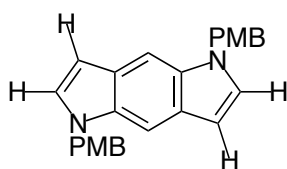

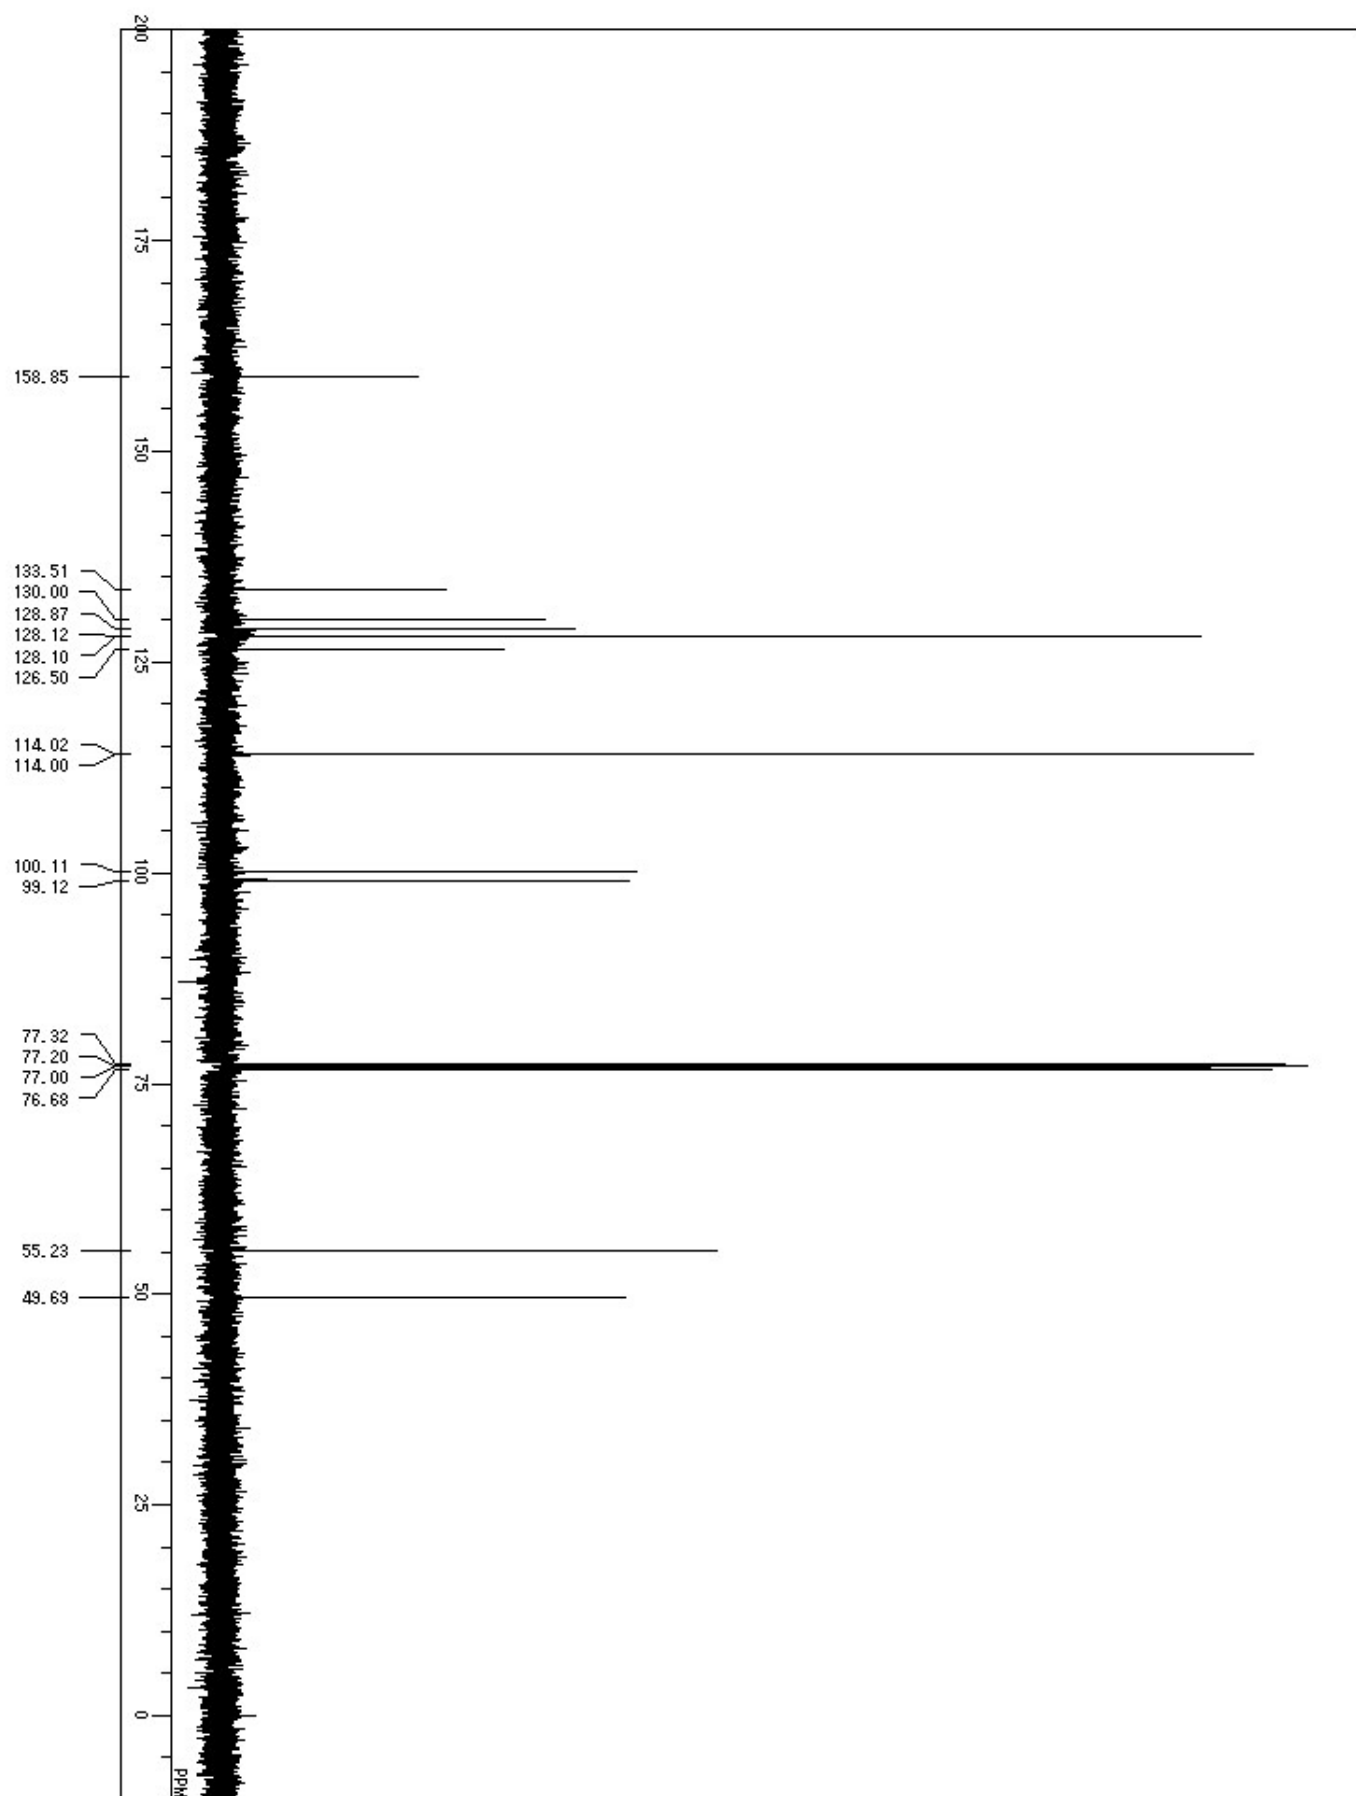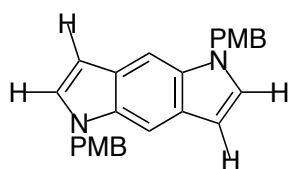





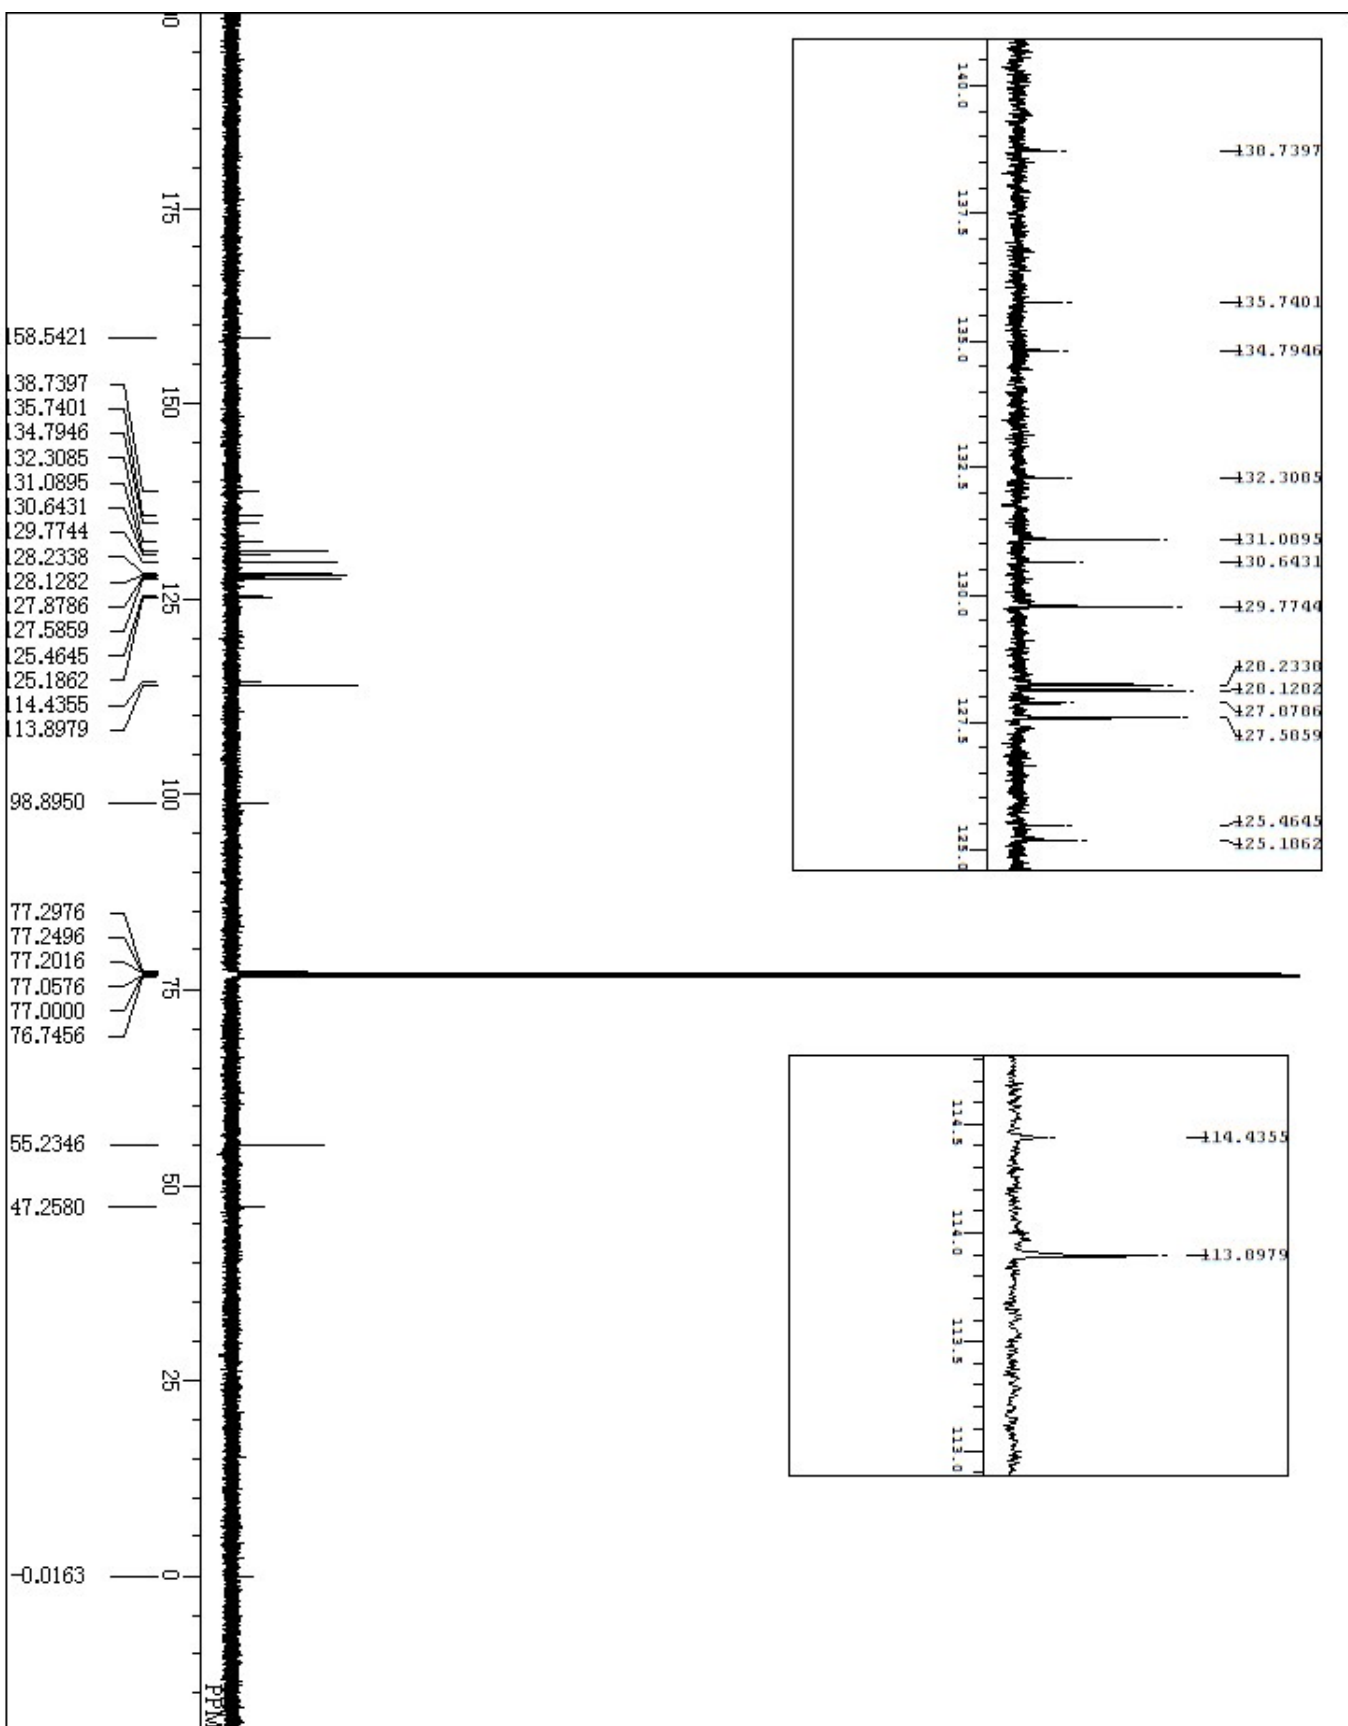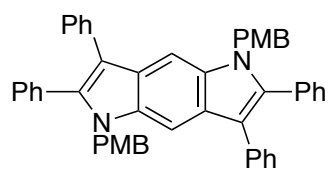

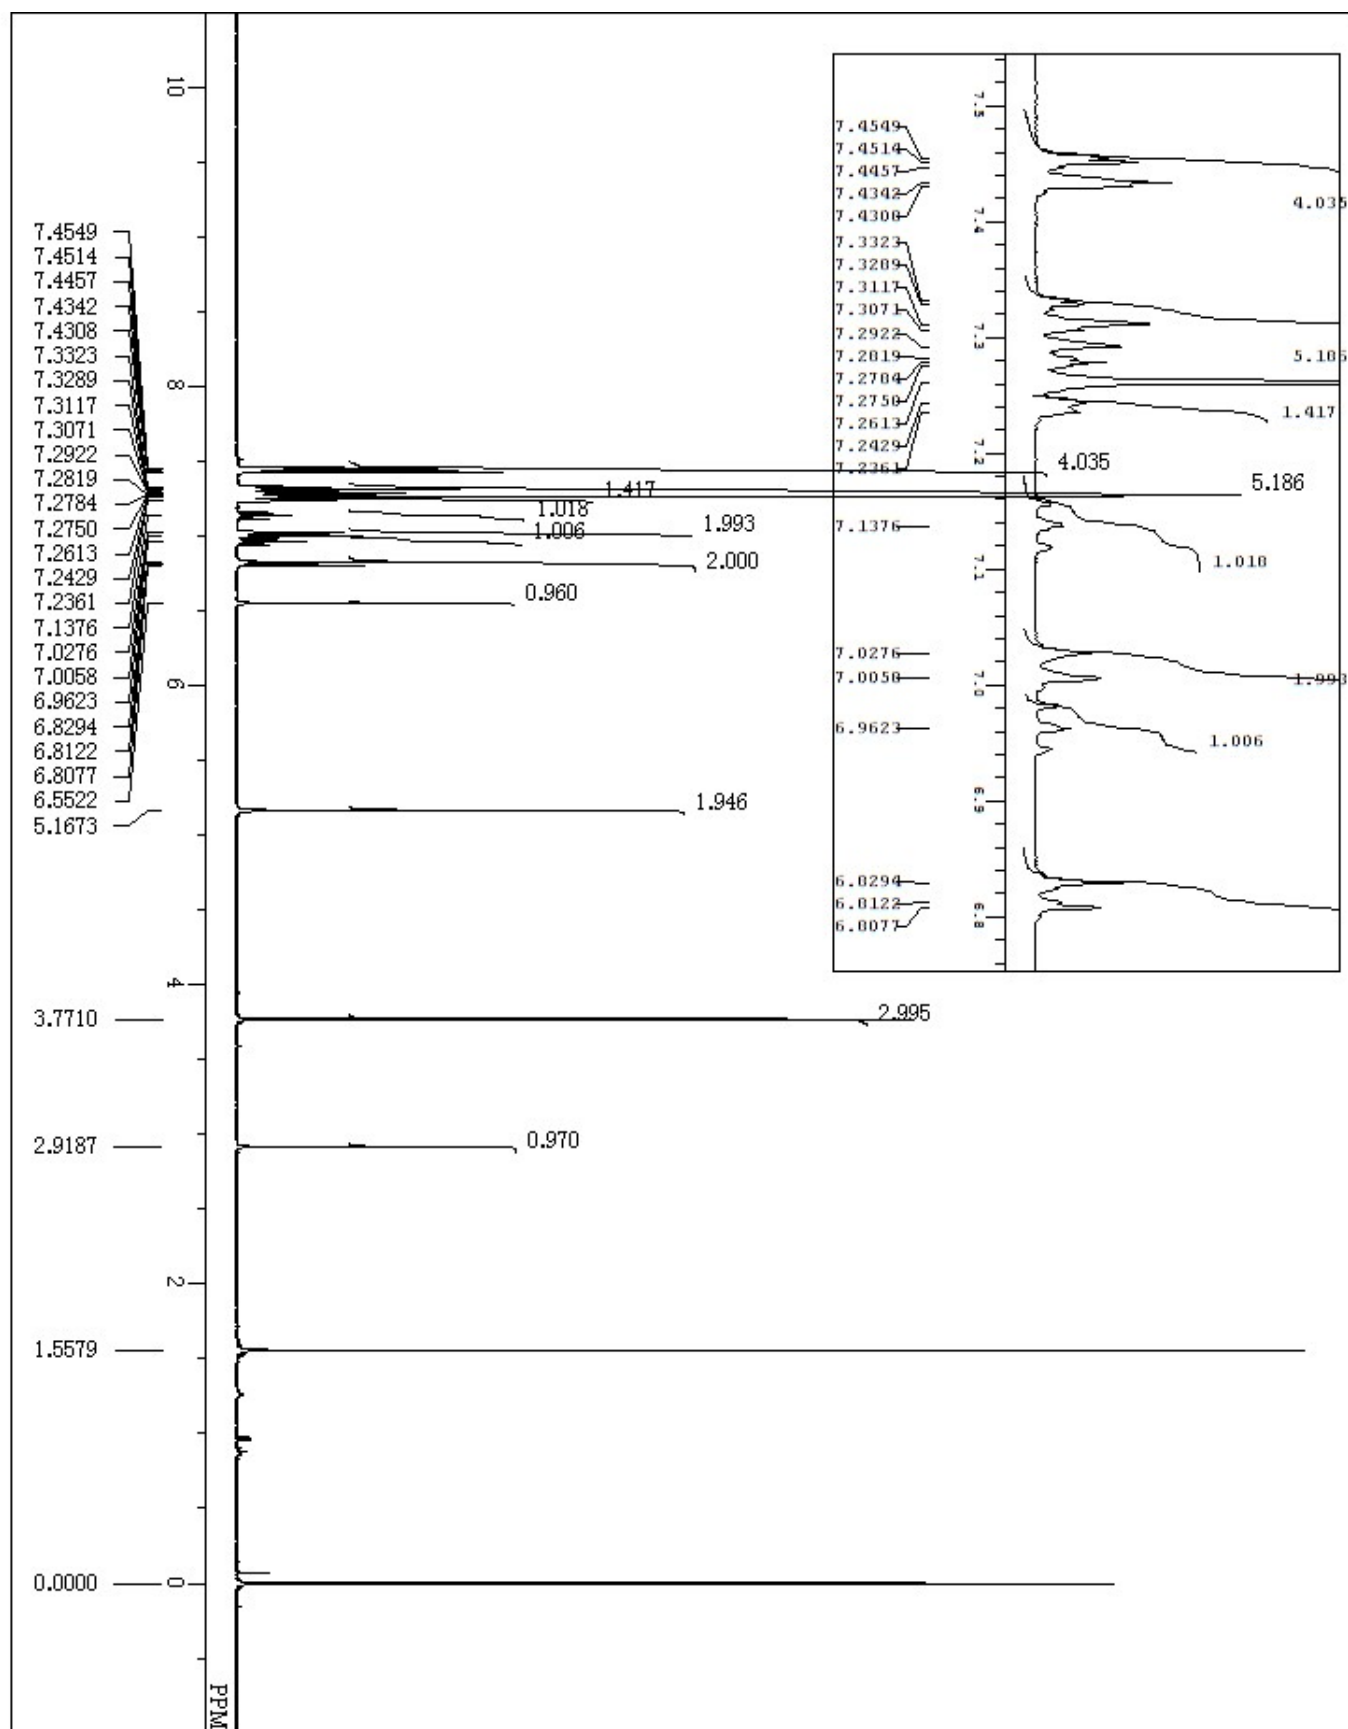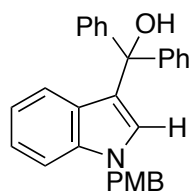

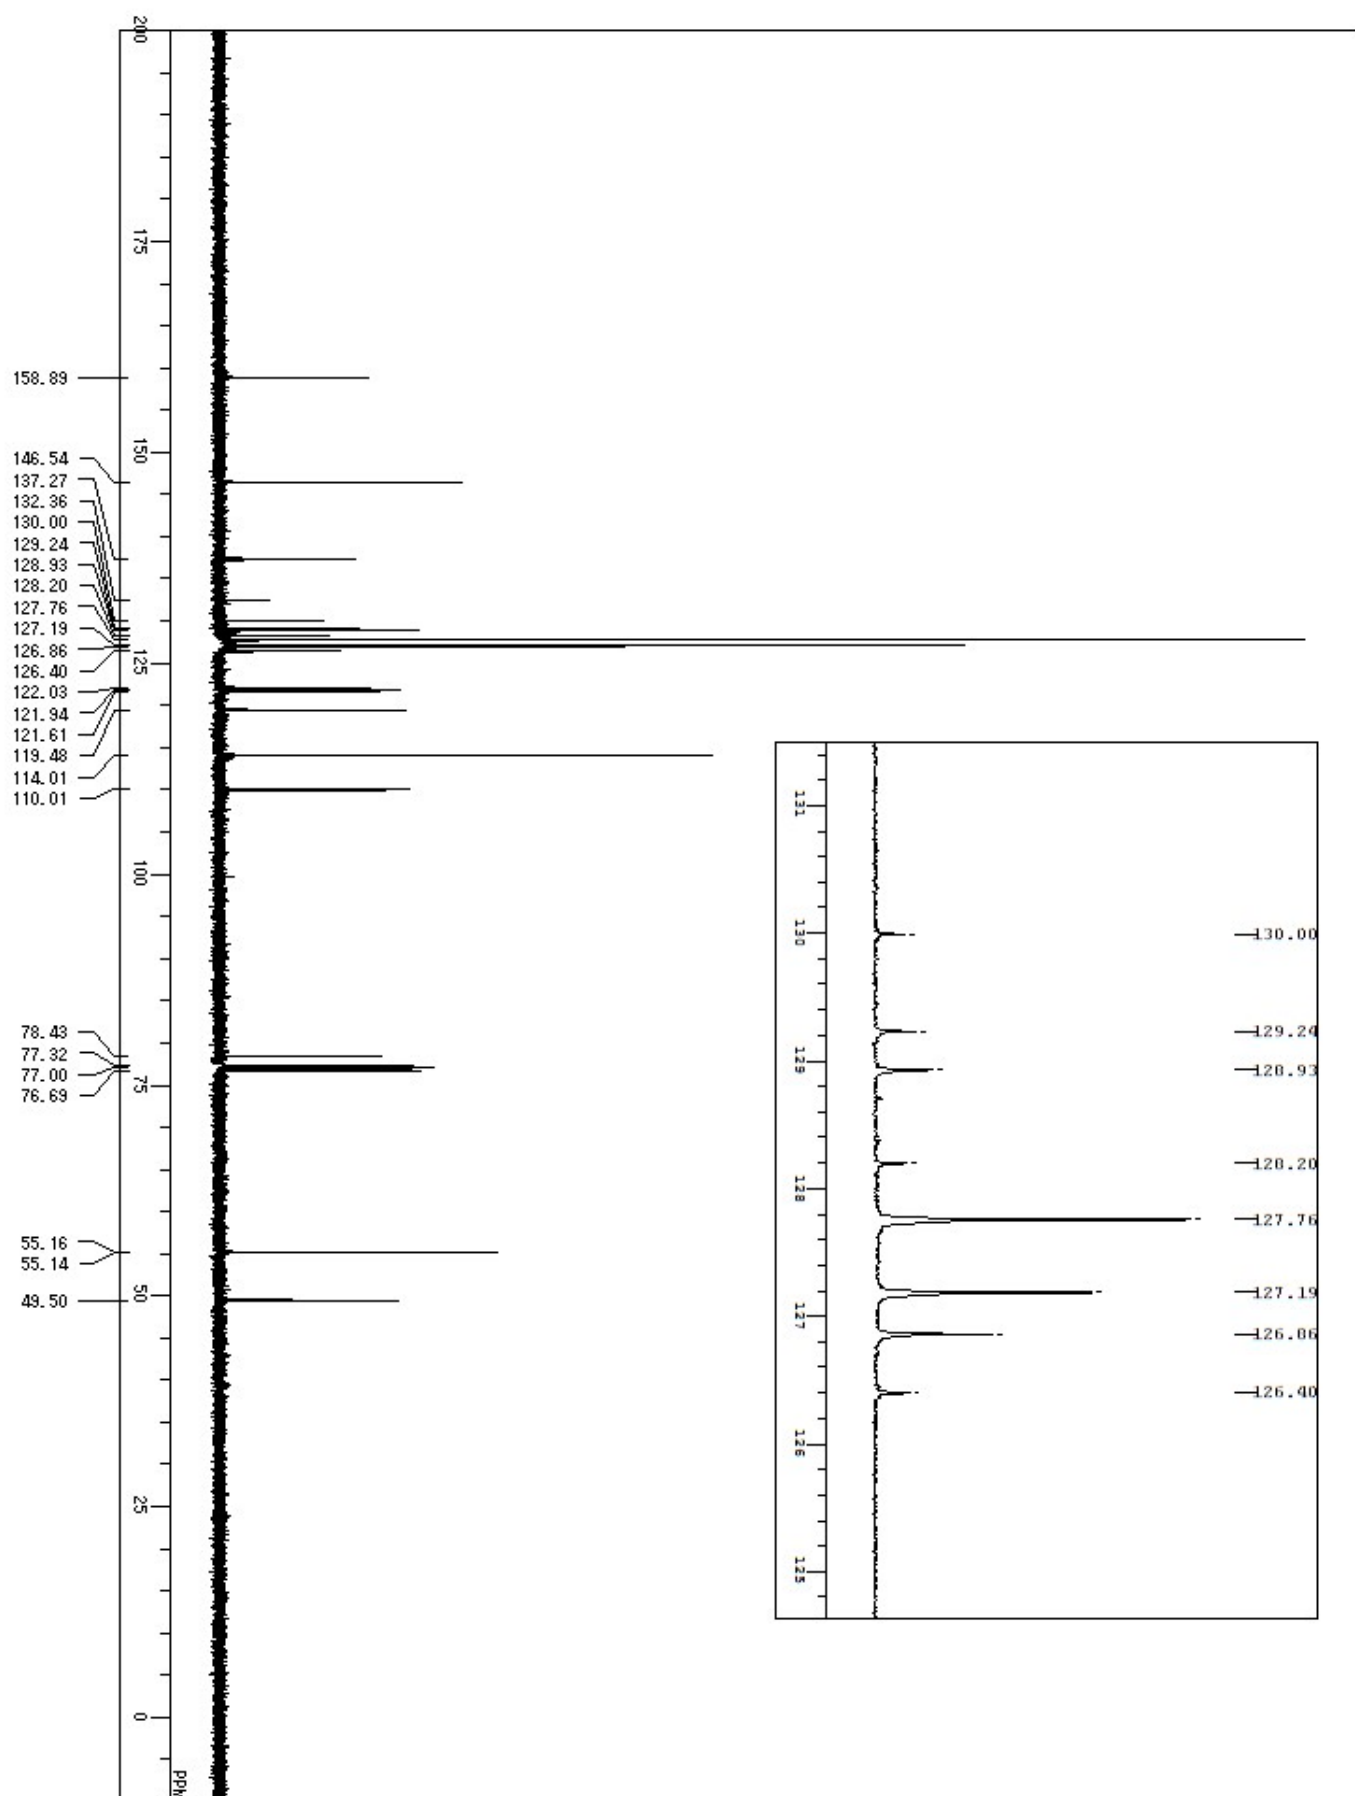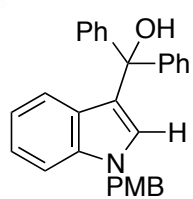

noe

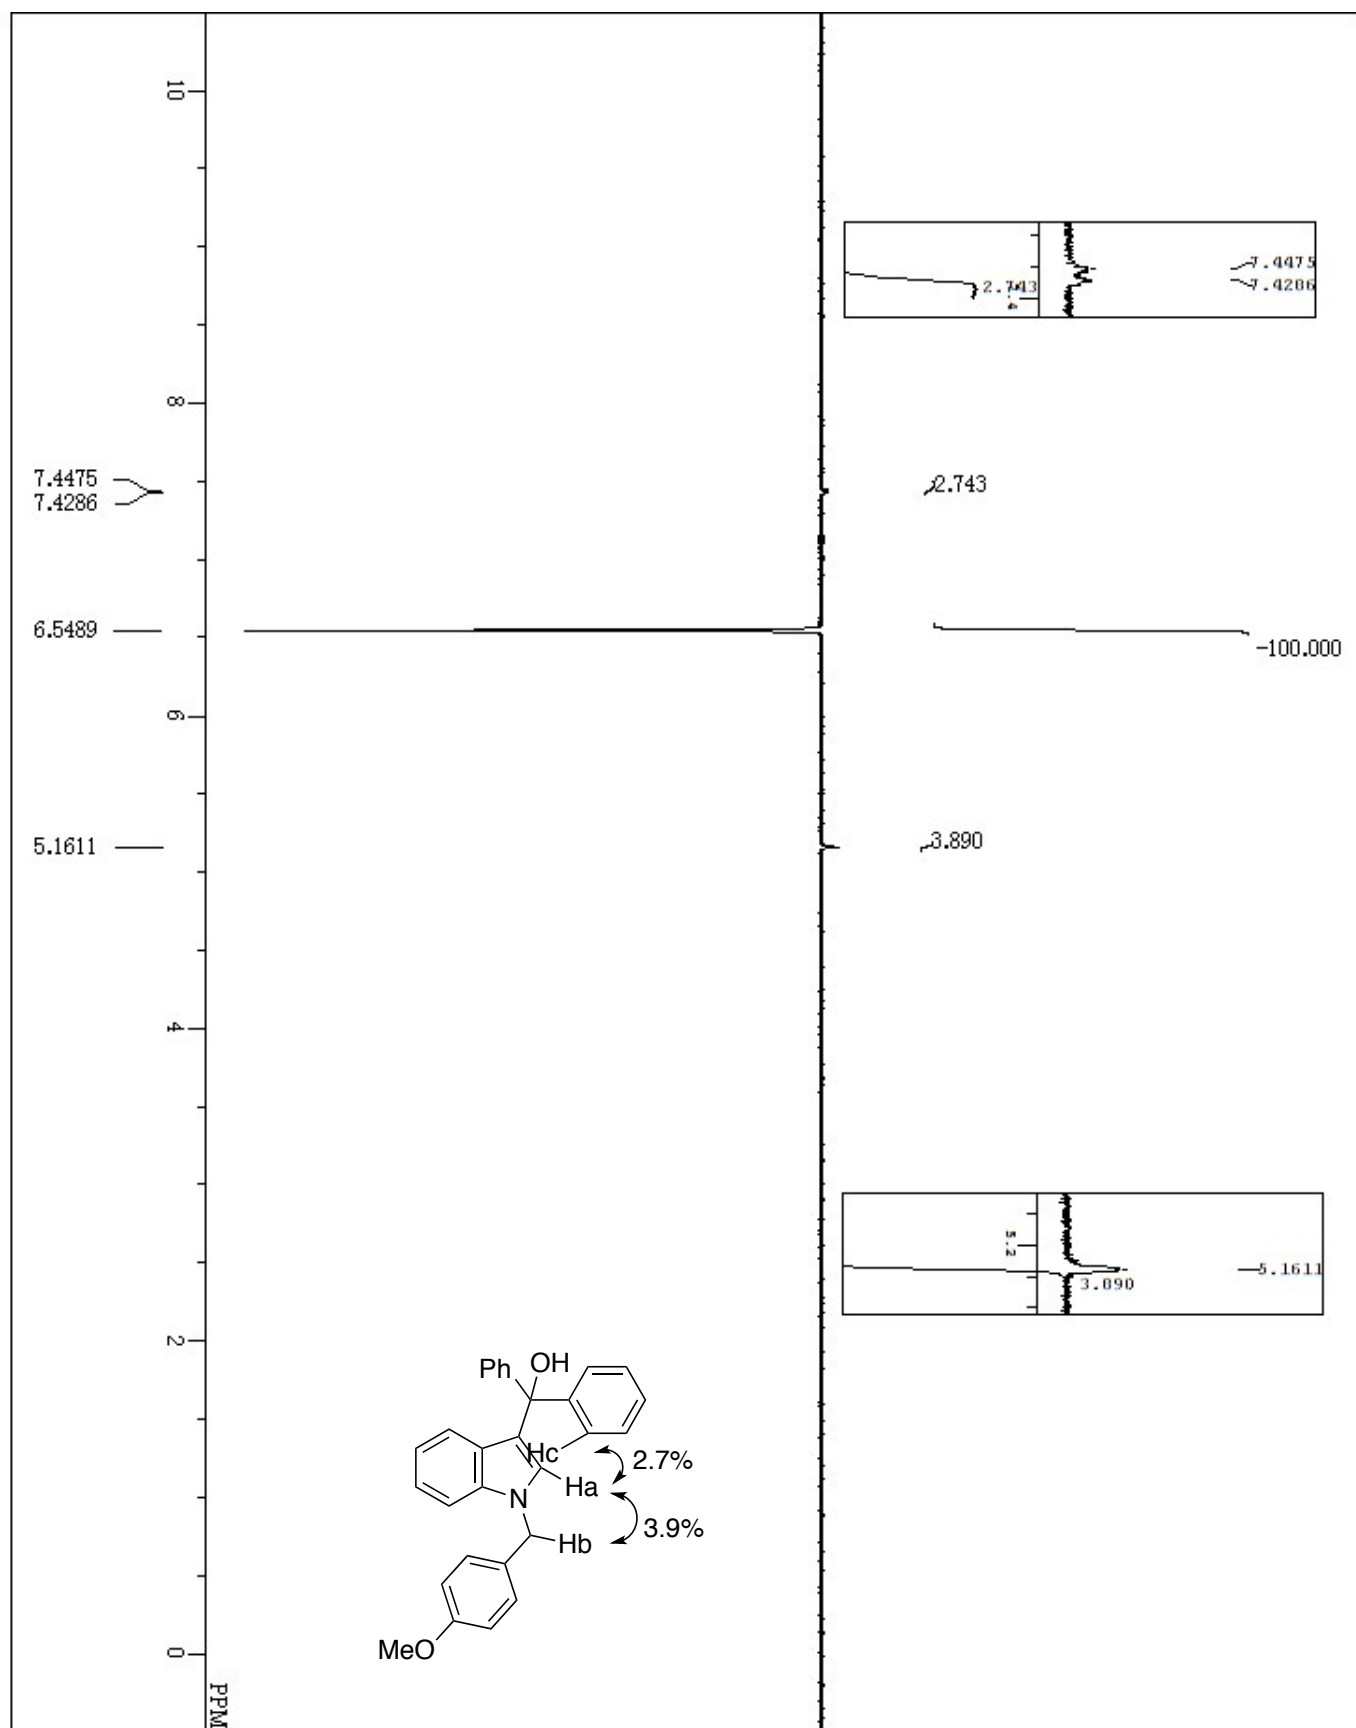

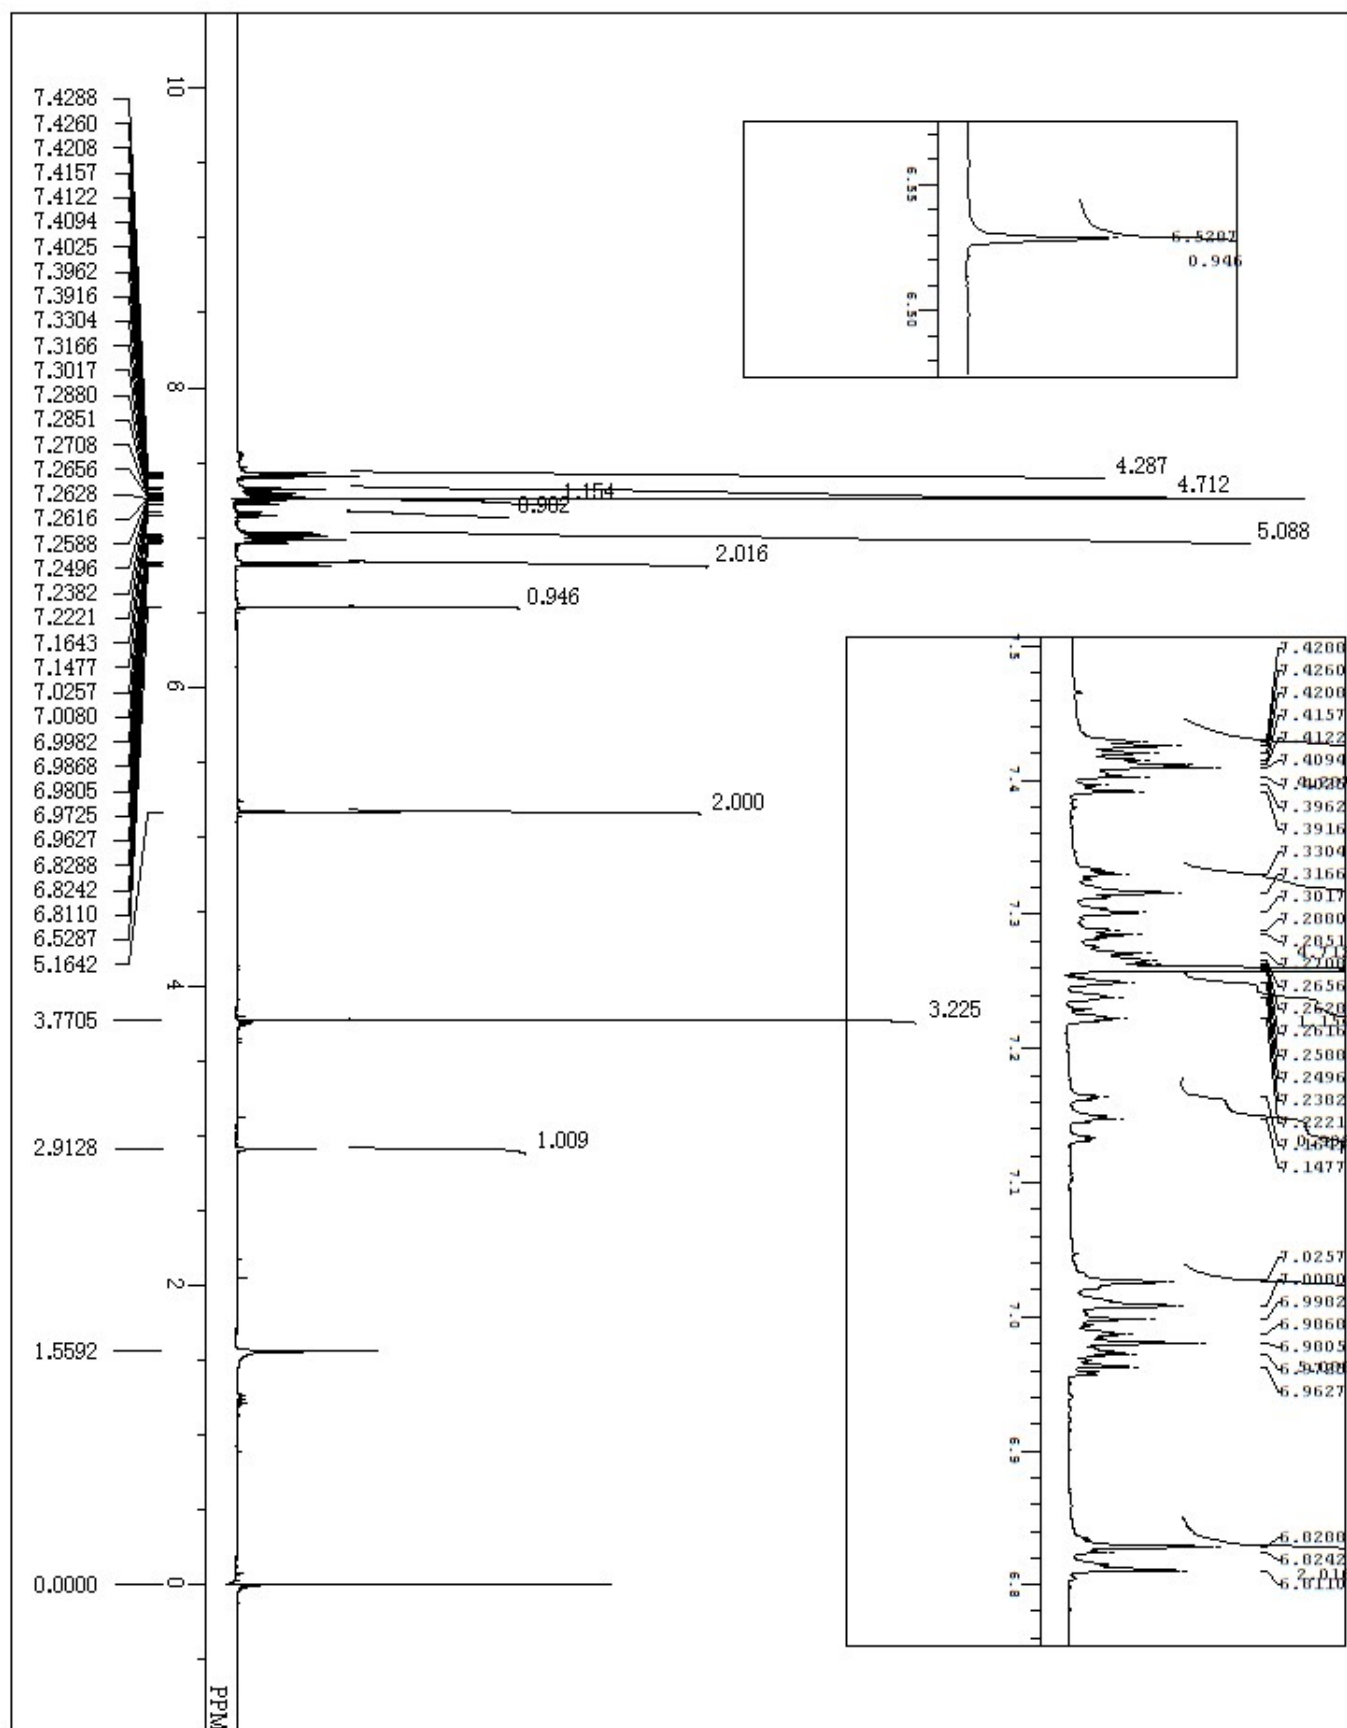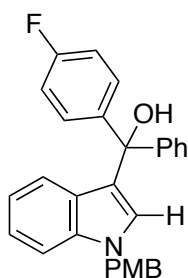

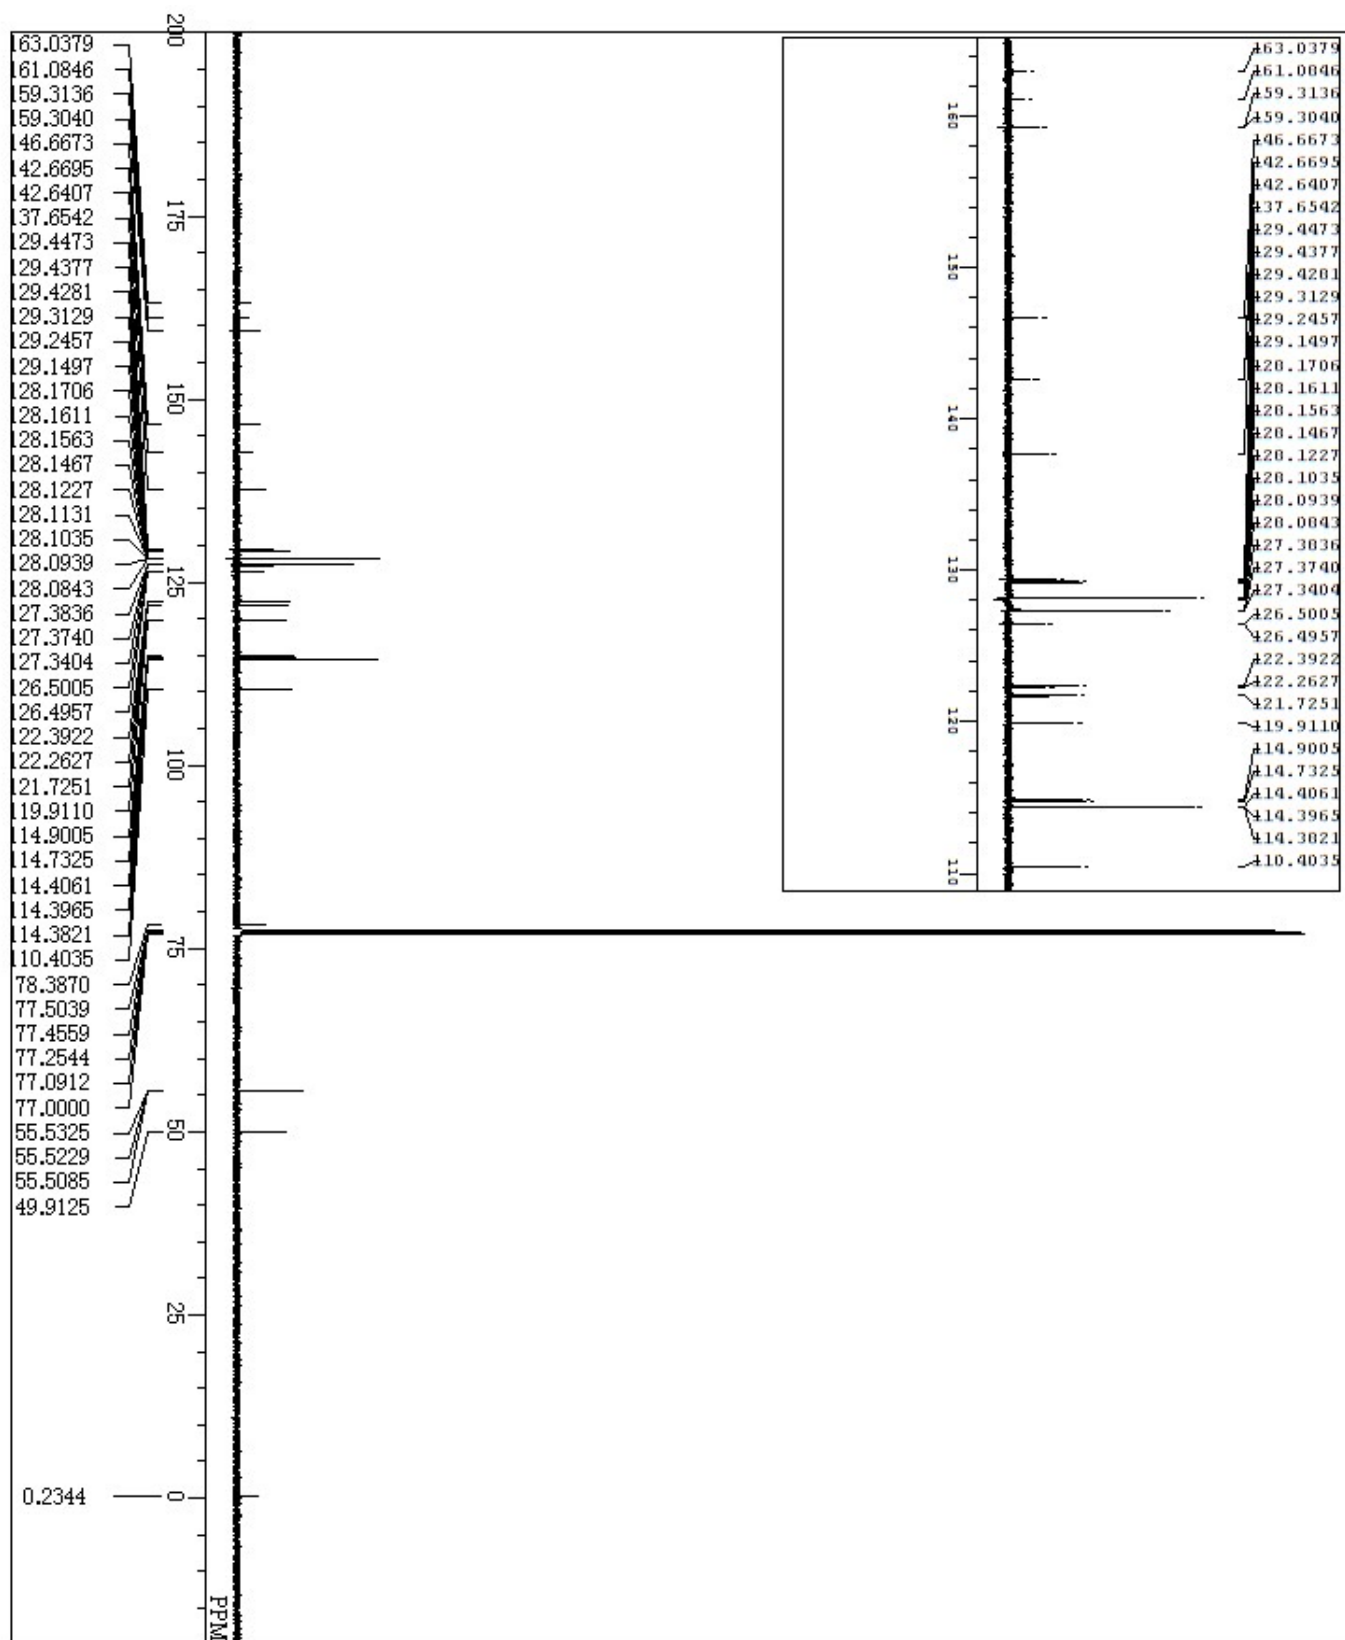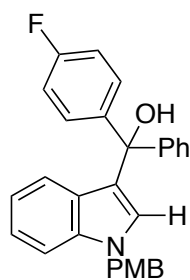

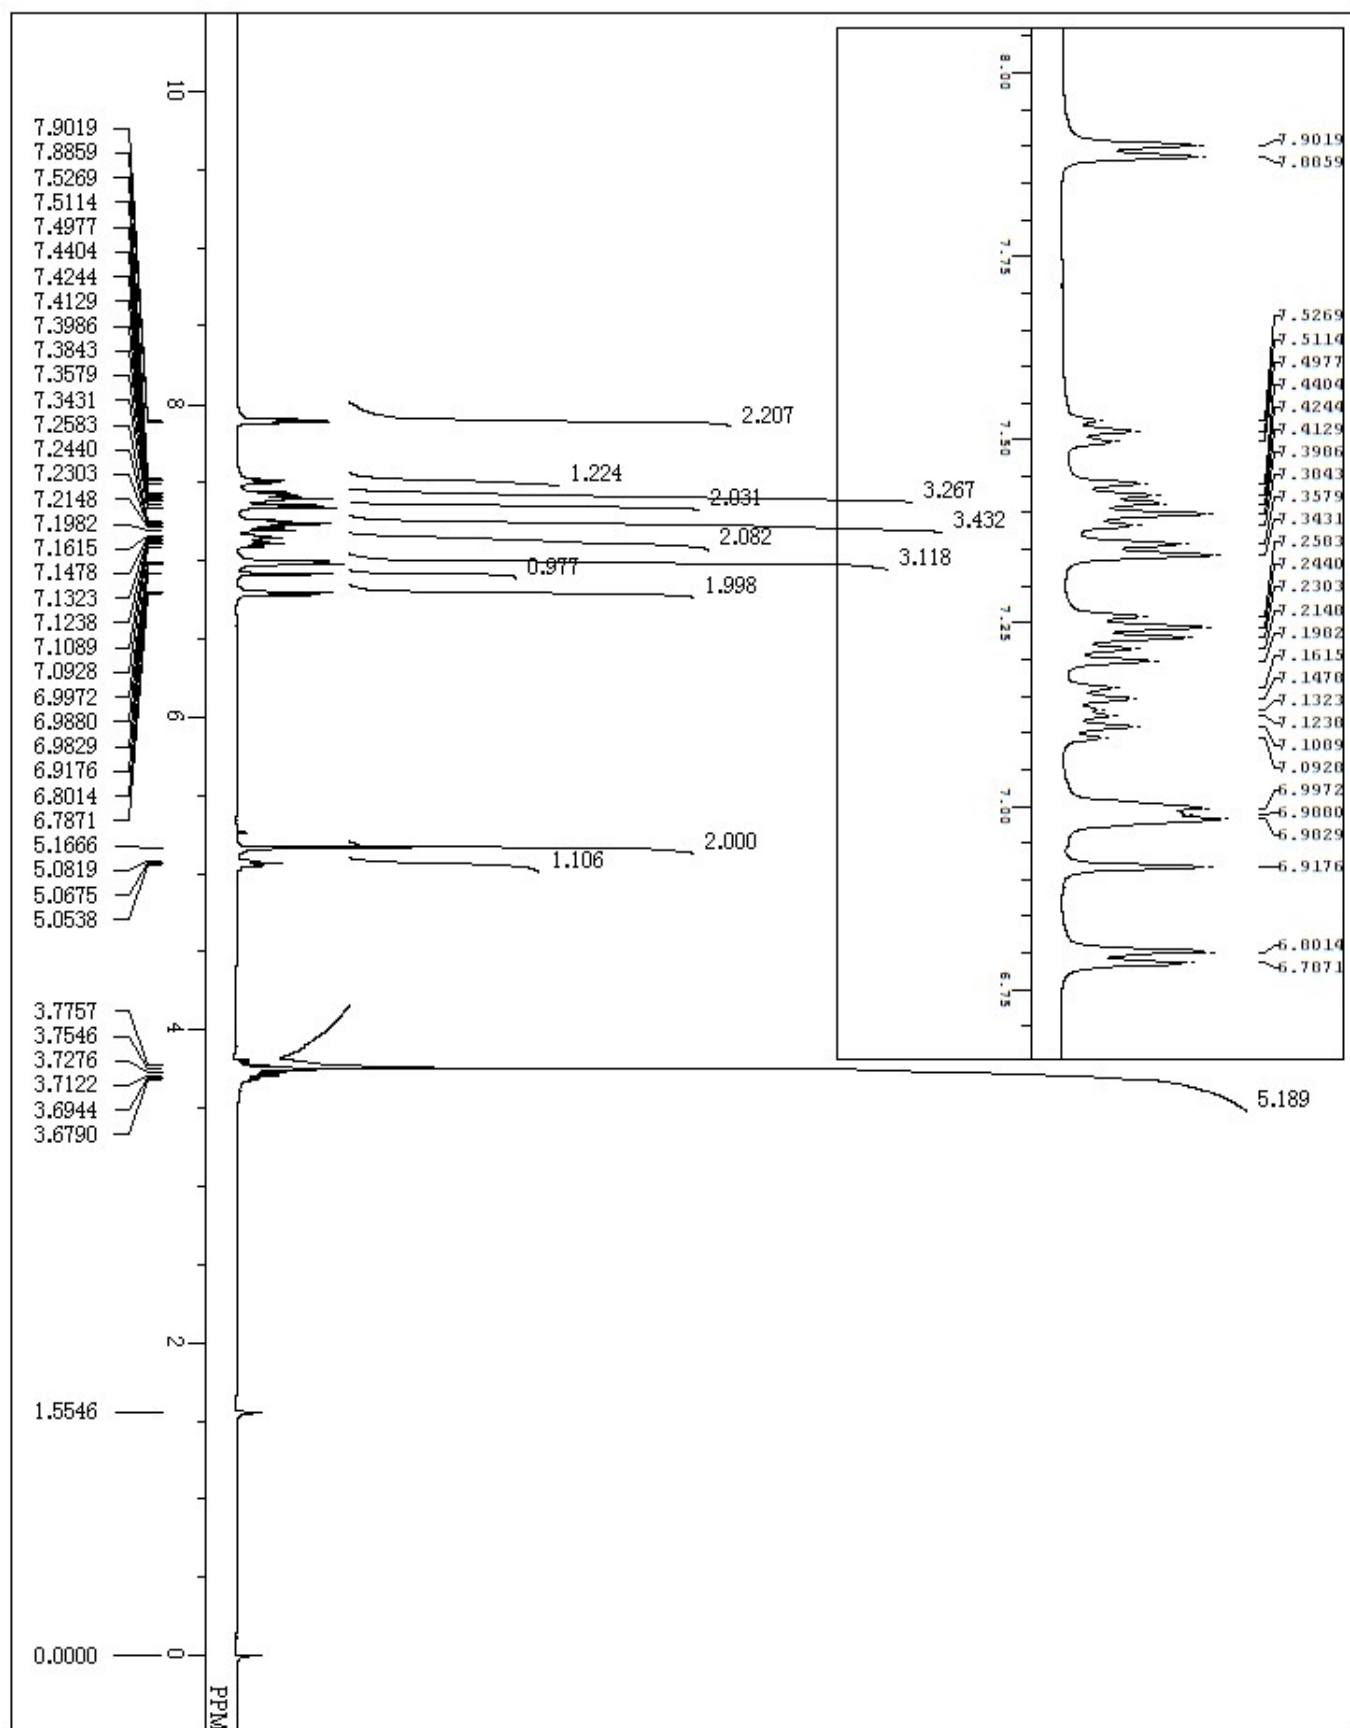



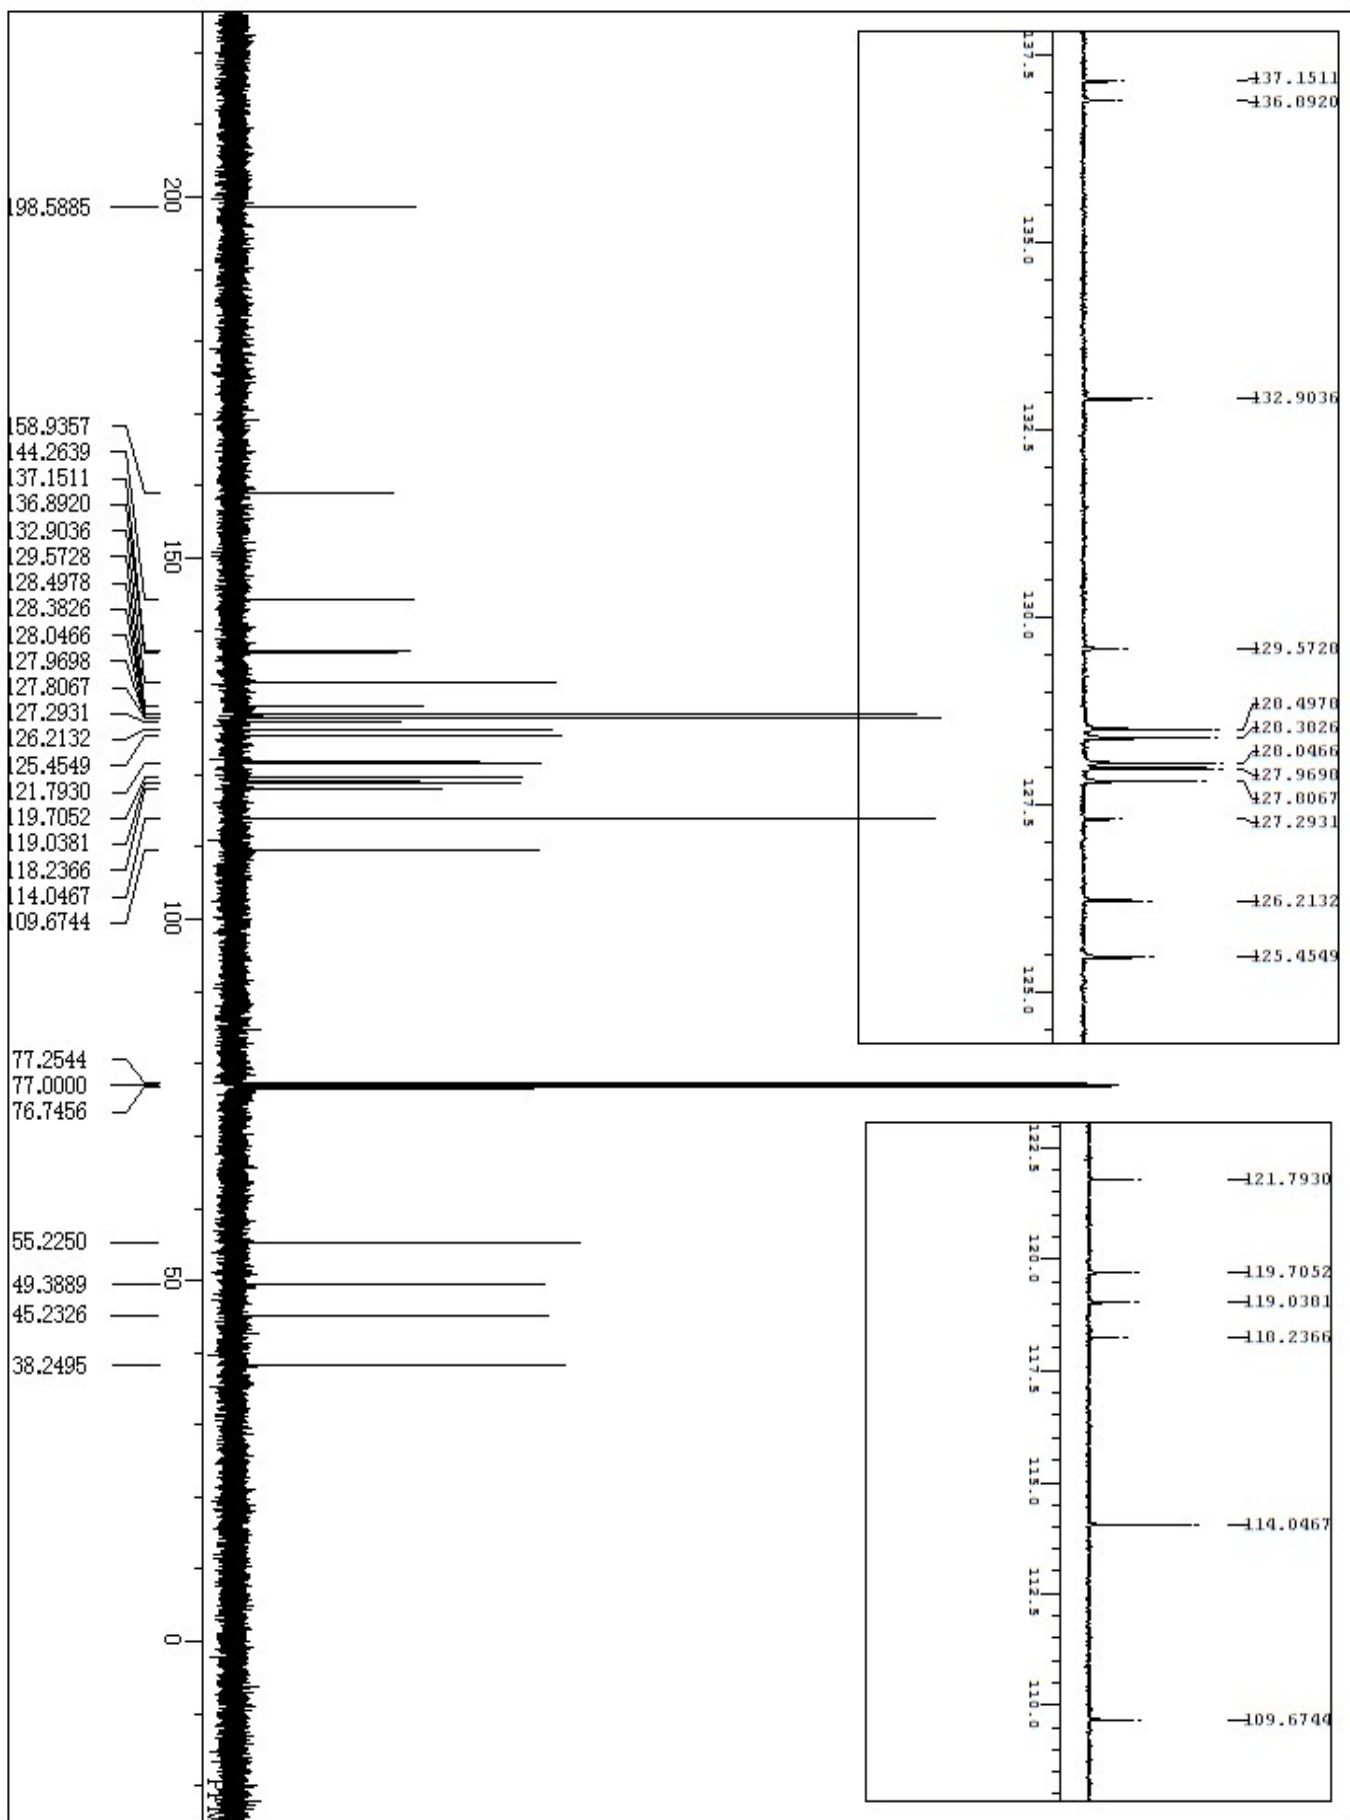

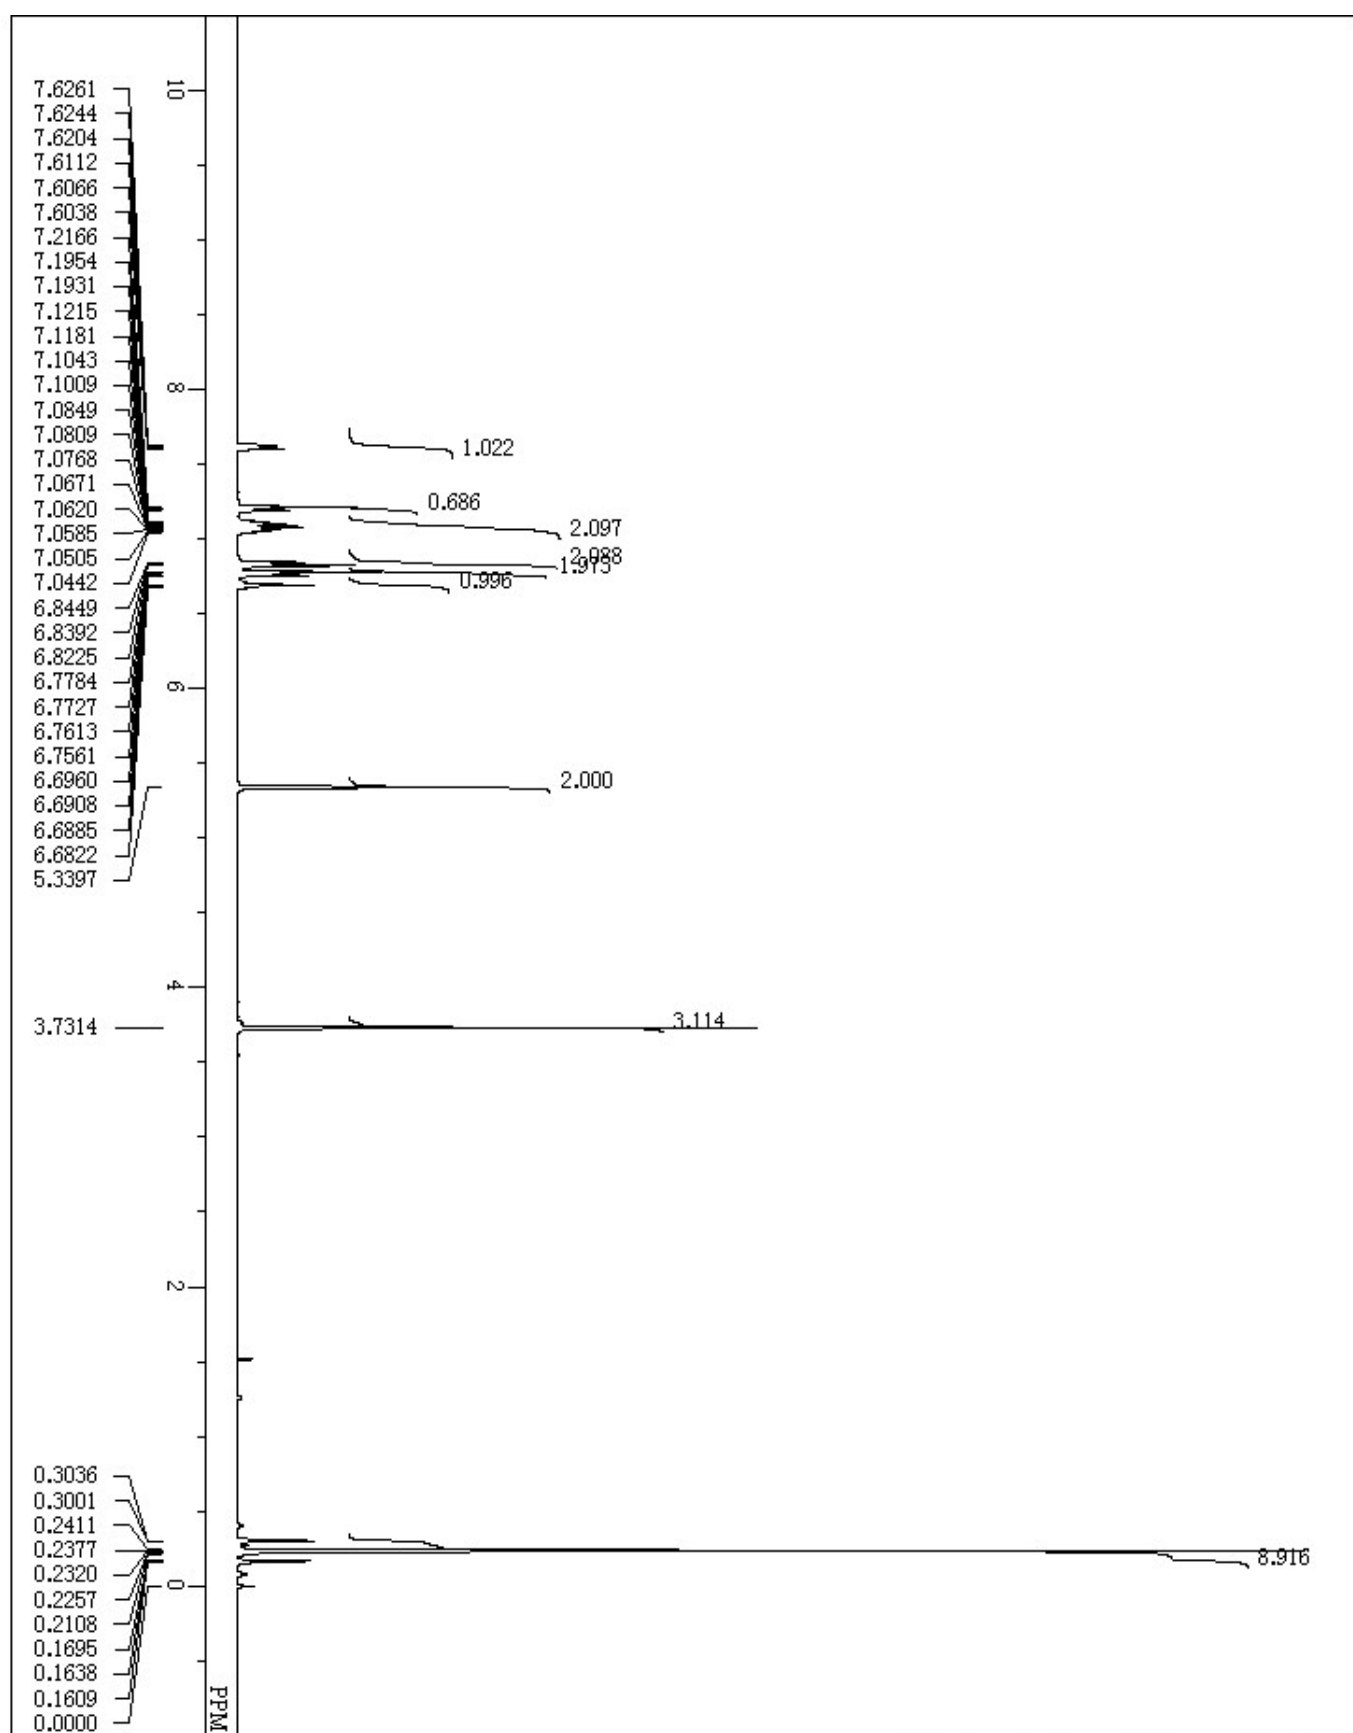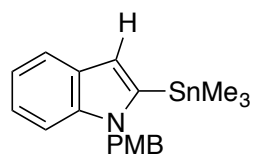

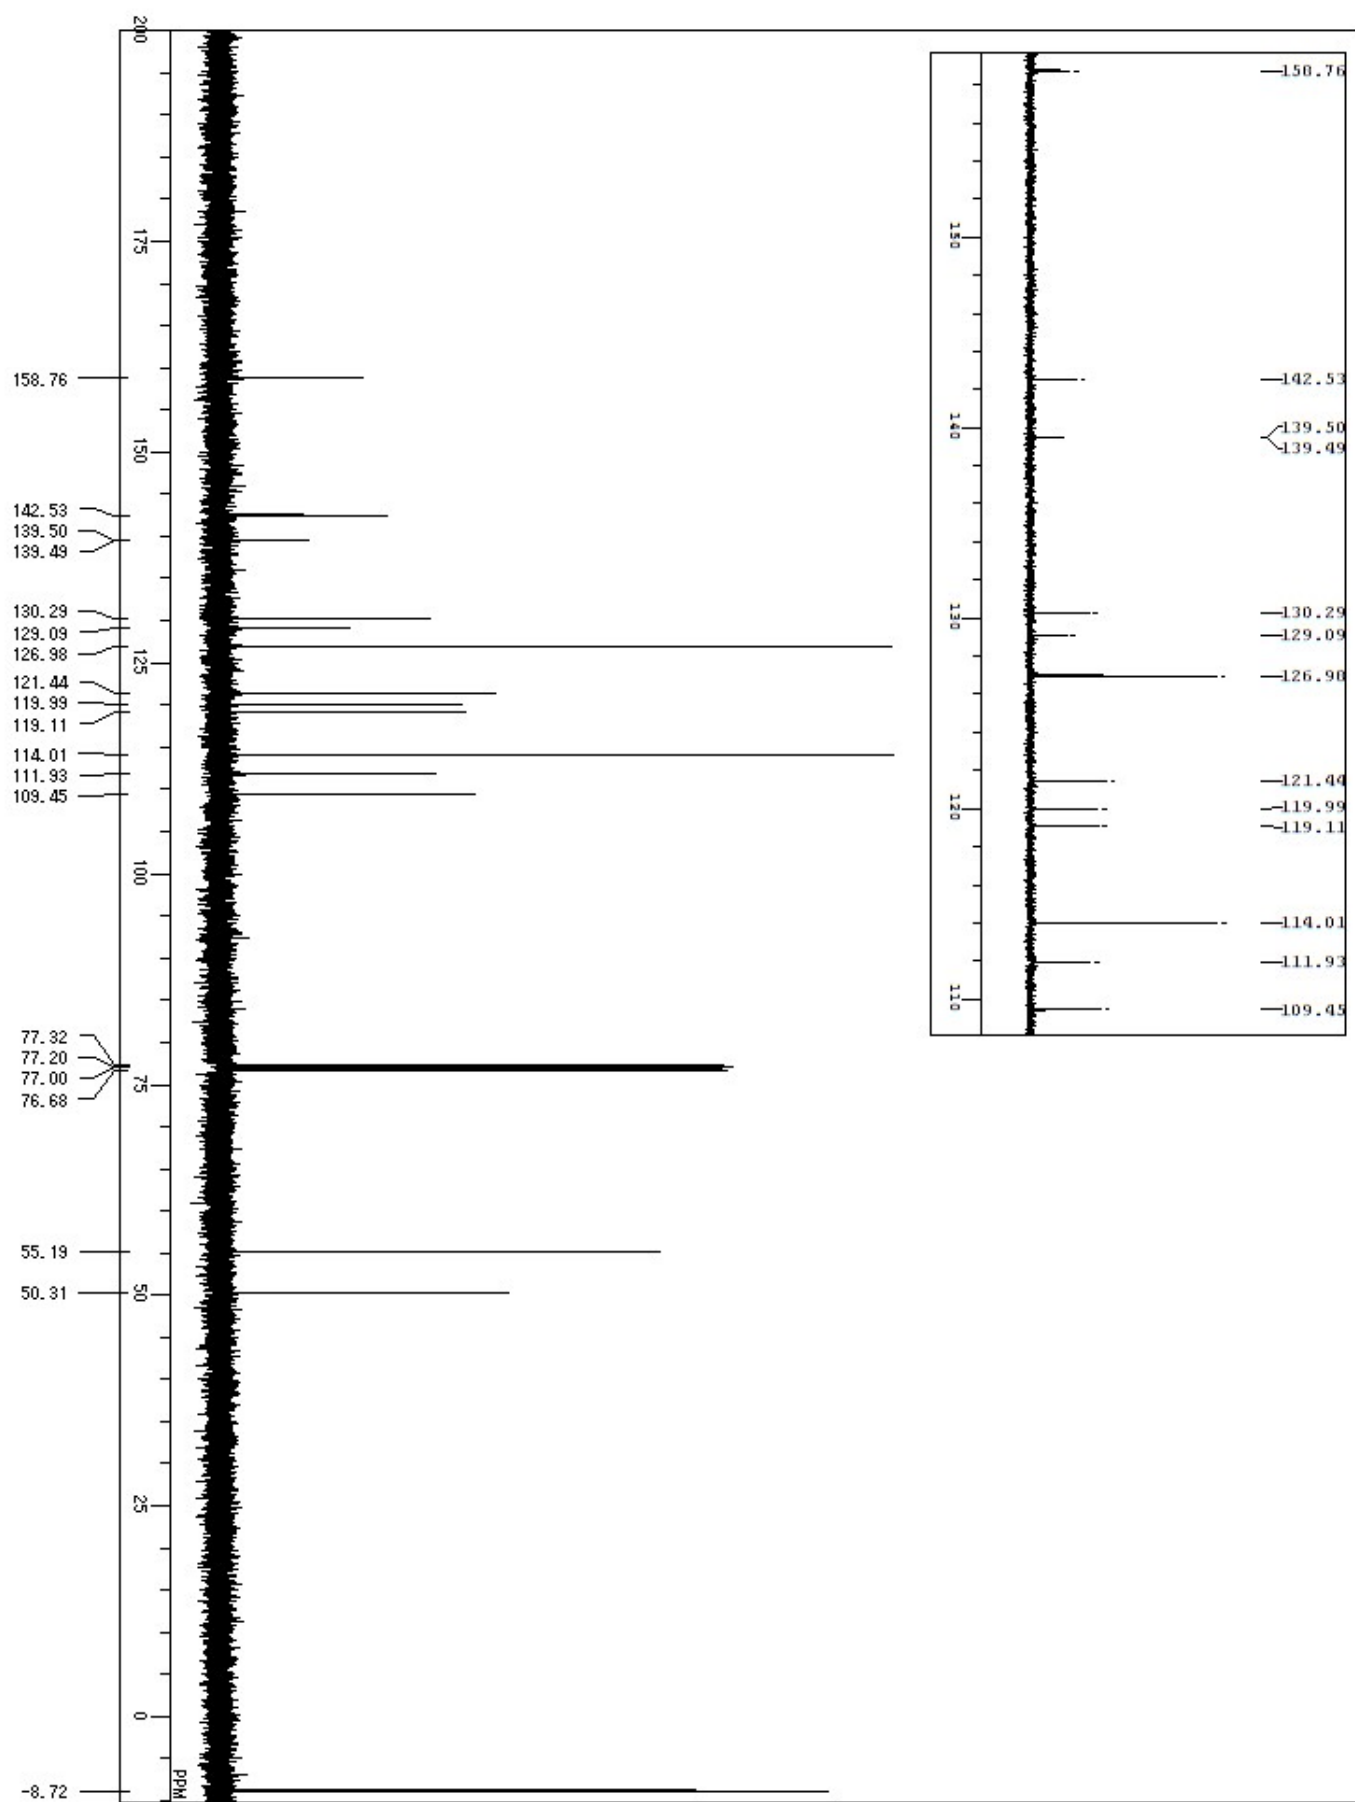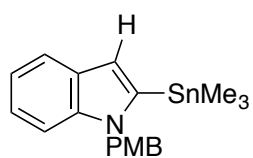

noe

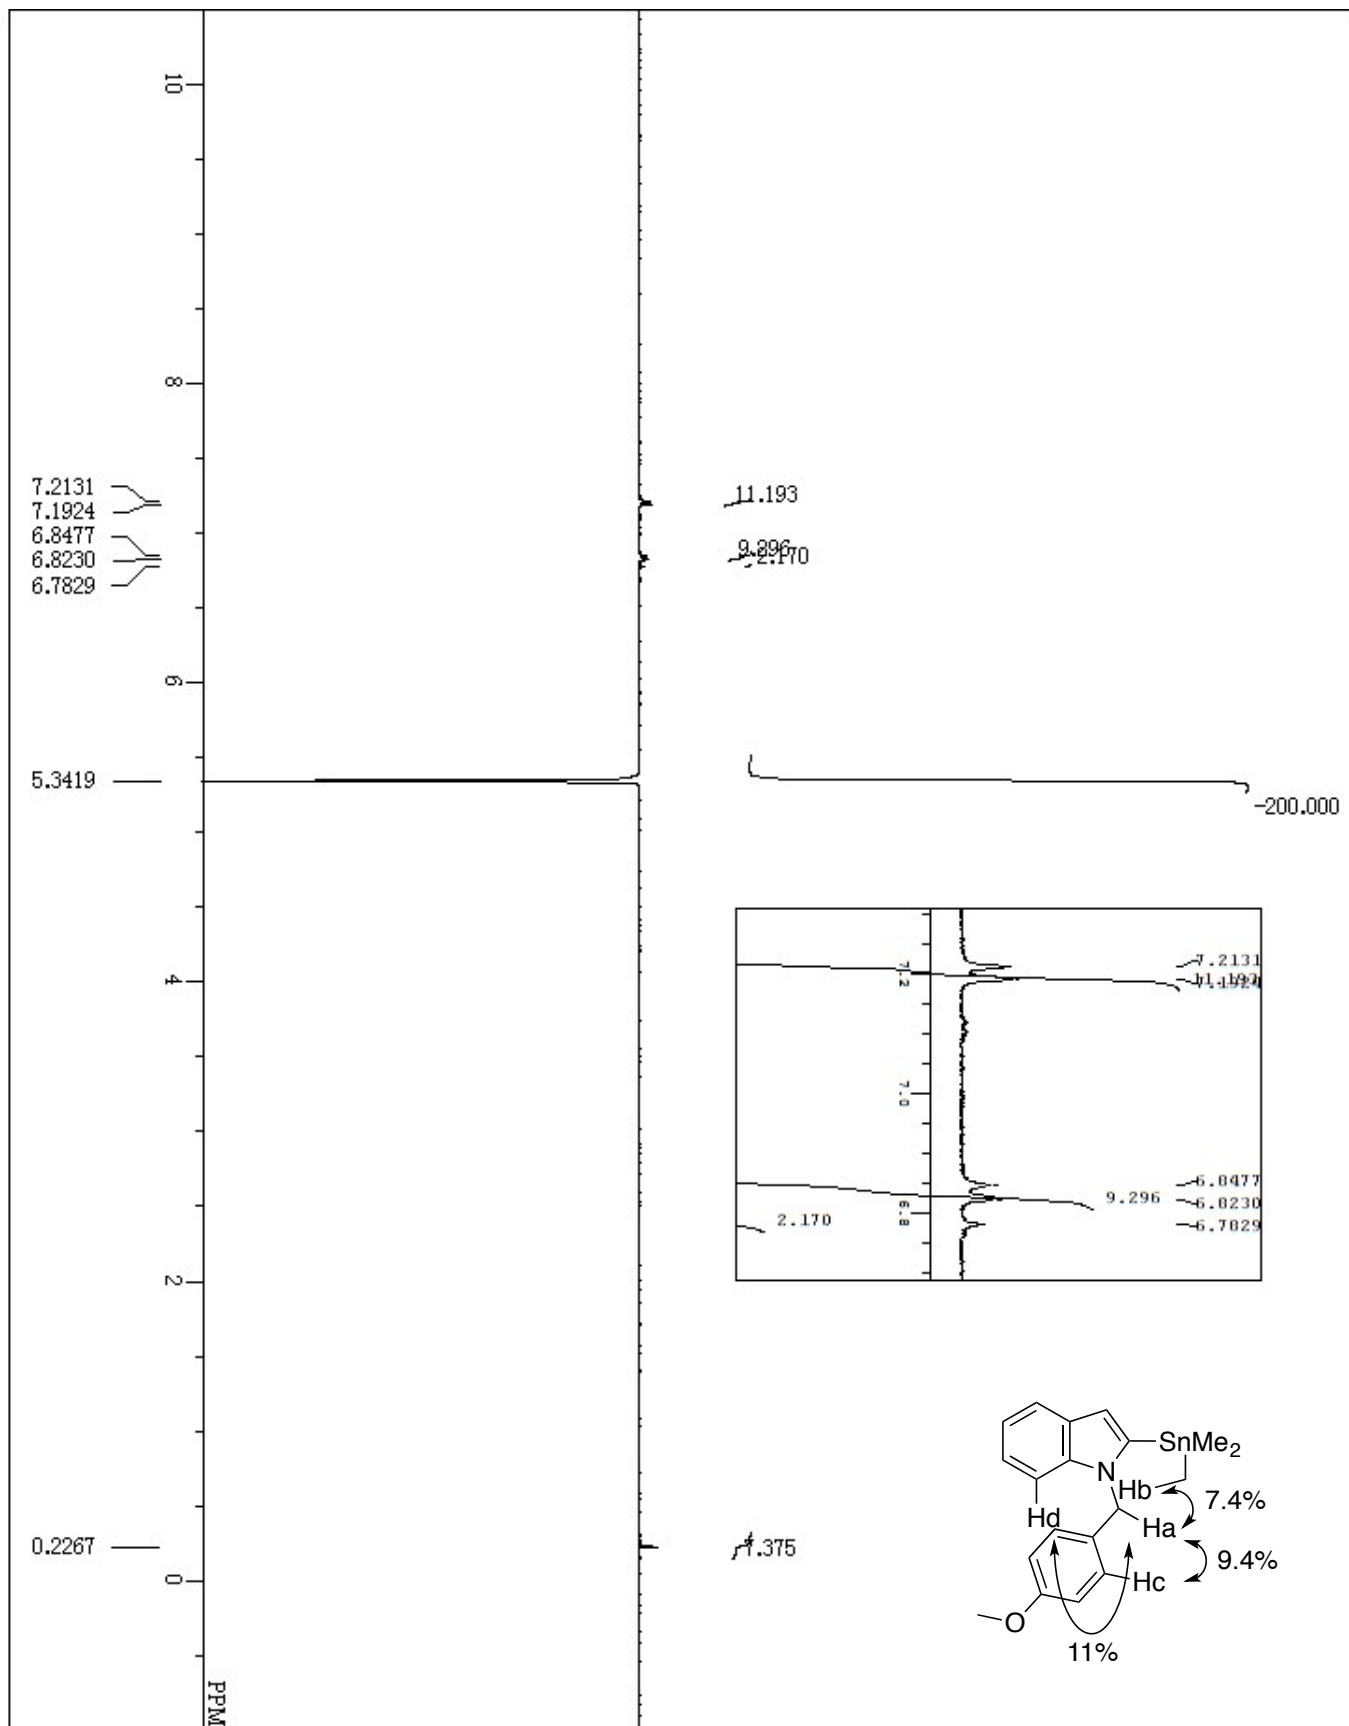

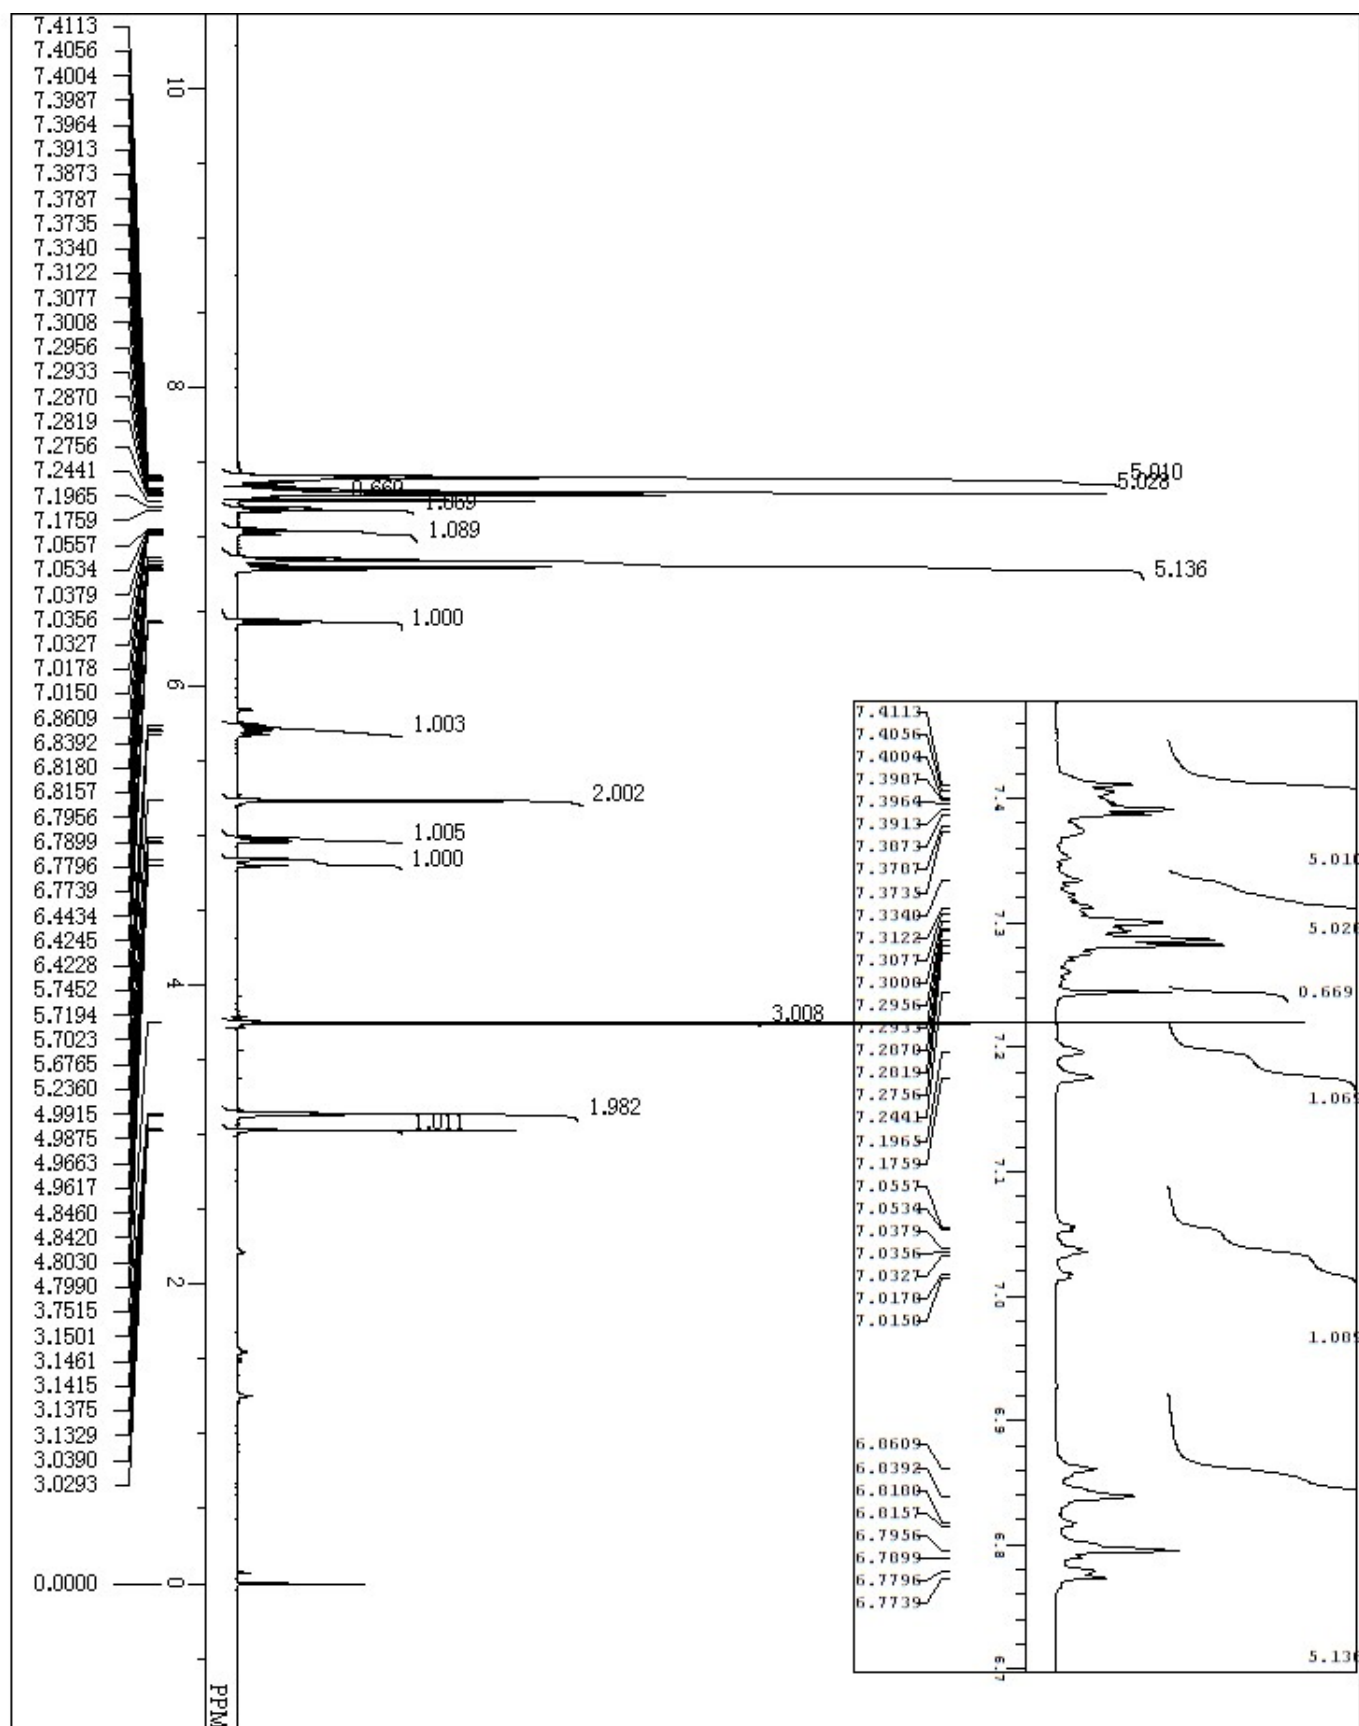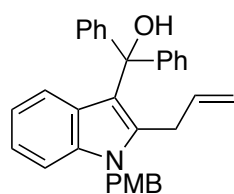

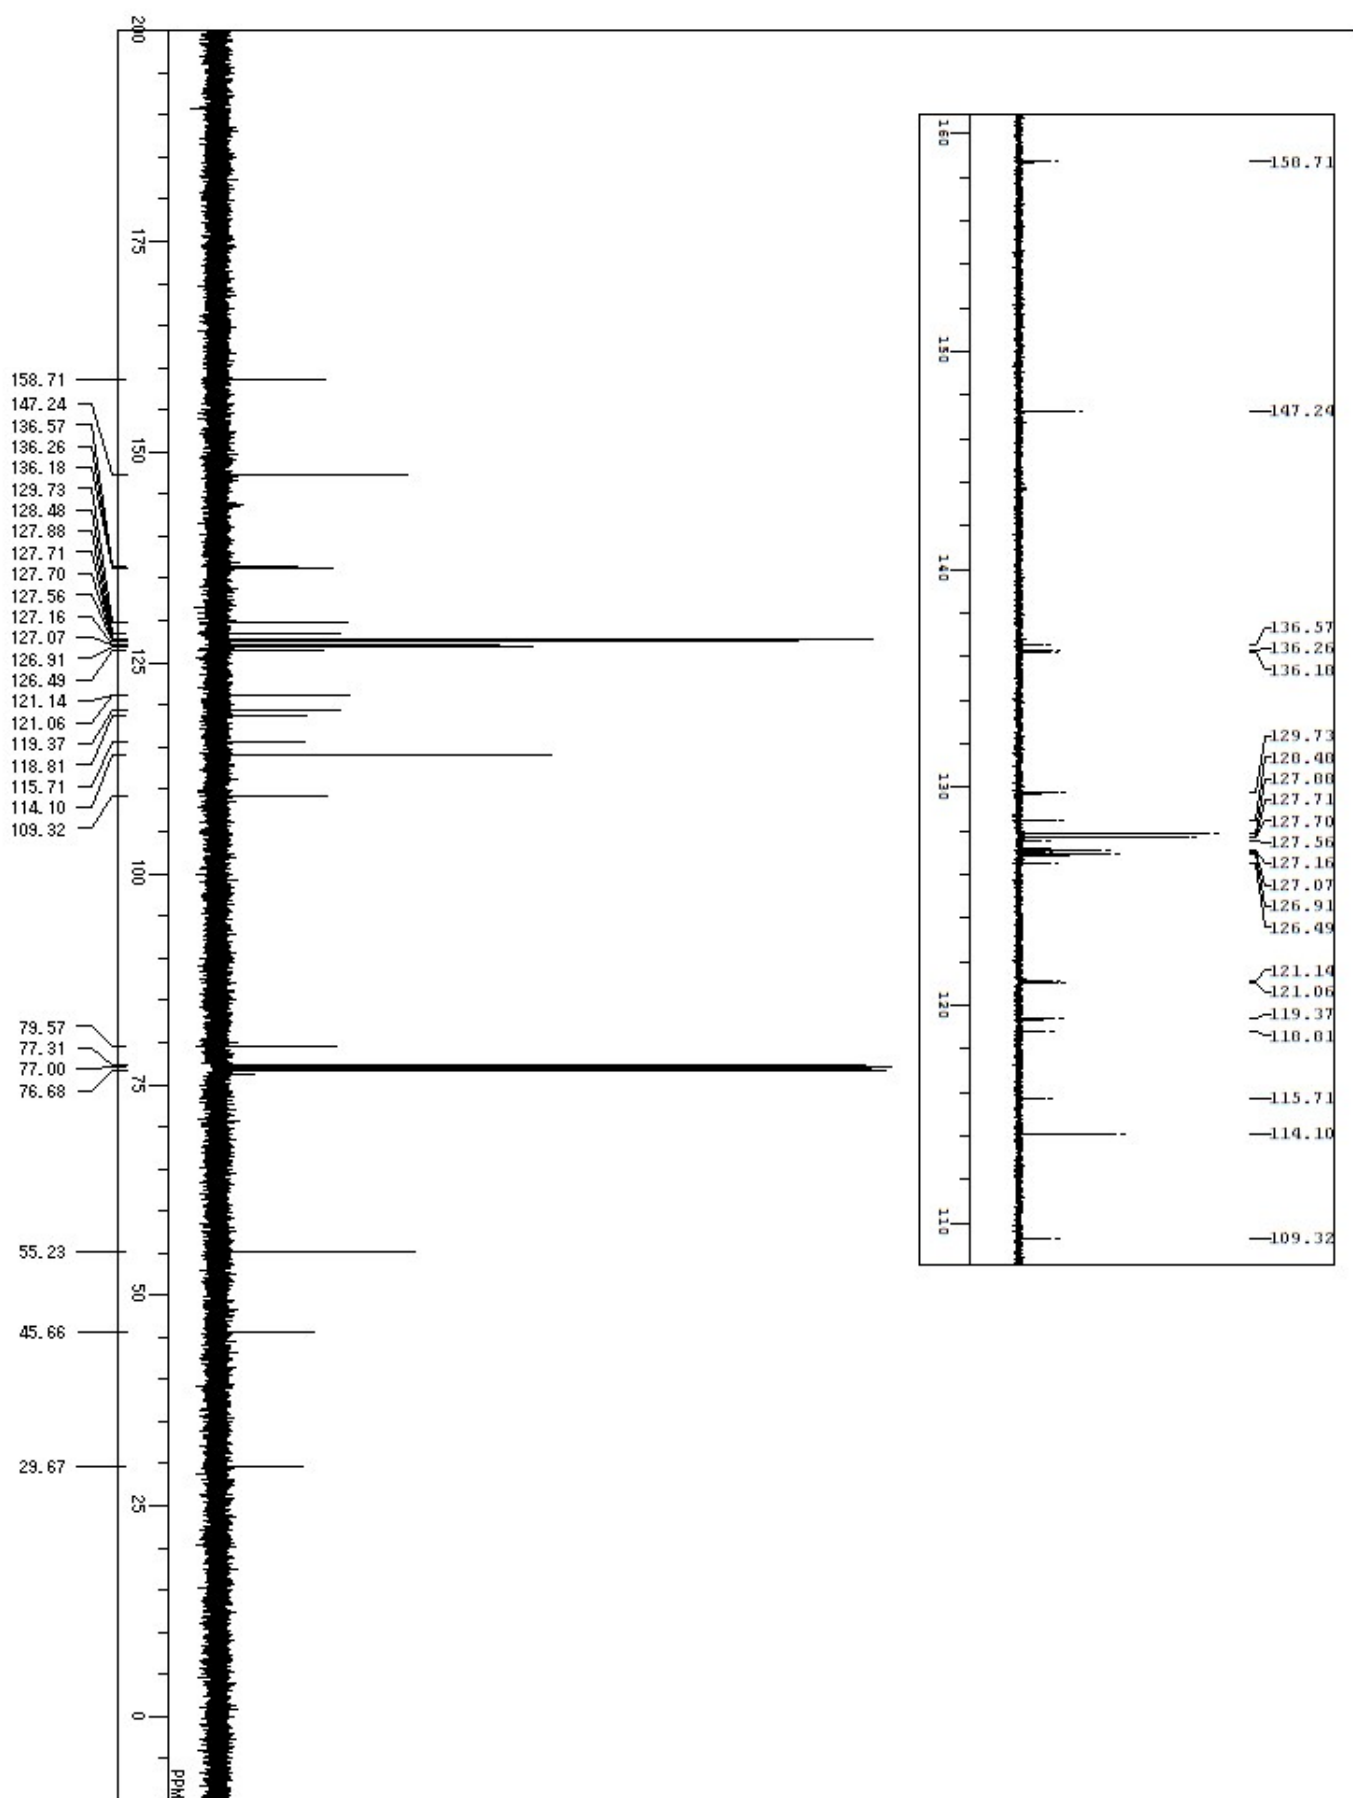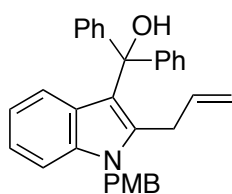

### 13. DFT Calculations

Calculations were performed with the GAUSSIAN 09 program package. All calculations were performed with the B3LYP method using the split valence basis set with polarization. 6-31G\*+ basis set was used for all atoms. Energy difference was calculated using Sum of electronic and thermal Energies.

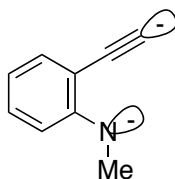

(Scheme 1, A) B3LYP/6-31+g(d)

Energy = -401.621612 (Hartree)

| Atom | X         | Y         | Z         |
|------|-----------|-----------|-----------|
| C    | -0.9009   | -1.307126 | 0.000151  |
| C    | -0.597258 | 0.107887  | 0.000015  |
| C    | 0.840491  | 0.453321  | 0.000201  |
| C    | 1.777133  | -0.59299  | -0.000063 |
| C    | 1.437632  | -1.965704 | -0.000091 |
| C    | 0.08144   | -2.306269 | -0.000021 |
| H    | -1.944232 | -1.61671  | -0.000002 |
| H    | 2.828503  | -0.305078 | -0.000108 |
| H    | 2.216795  | -2.730645 | -0.000229 |
| H    | -0.225054 | -3.357953 | -0.000052 |
| C    | 1.326048  | 1.806055  | 0.000277  |
| N    | -1.516883 | 1.079611  | -0.000146 |
| C    | -2.884149 | 0.665006  | -0.000027 |
| H    | -3.189558 | 0.048528  | 0.888108  |
| H    | -3.539429 | 1.553667  | -0.000228 |
| H    | -3.189639 | 0.048107  | -0.887889 |
| C    | 1.86303   | 2.940286  | -0.000205 |

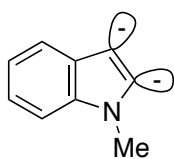

(Scheme 1, B) B3LYP/6-31+g(d)

Energy = -401.572927 (Hartree)

| Atom | X         | Y         | Z         |
|------|-----------|-----------|-----------|
| C    | -0.56896  | -1.442416 | -0.000008 |
| C    | 0.218146  | -0.288284 | -0.000018 |
| C    | -0.340728 | 1.06064   | 0.000004  |
| C    | -1.751415 | 1.1421    | 0.000006  |
| C    | -2.551636 | -0.011911 | 0.000008  |
| C    | -1.974255 | -1.303544 | -0.000003 |
| H    | -0.121158 | -2.443839 | -0.000013 |
| H    | -2.215761 | 2.132916  | 0.000029  |
| H    | -3.642136 | 0.084679  | 0.000021  |
| H    | -2.610803 | -2.193029 | -0.000001 |
| C    | 0.727179  | 2.032034  | 0.000012  |
| C    | 1.940964  | 1.305325  | -0.000009 |
| N    | 1.577209  | -0.117835 | -0.000048 |
| C    | 2.506607  | -1.205599 | 0.000029  |
| H    | 2.400866  | -1.859742 | -0.890745 |
| H    | 3.512274  | -0.766561 | 0.000035  |
| H    | 2.40085   | -1.859645 | 0.890881  |



## 14. References

---

- <sup>1</sup> Still, W.C. et al. *J. Org. Chem*, **1978**, *43*, 2923.
- <sup>2</sup> Pingborn, A.B.; Giardello, M.A.; Grubbs, R.H.; Rosen R.K.; Timmers F.J. *Organometallics* **1996**, *15*, 1518-1520.
- <sup>3</sup> Mohammed I. et al., *ACS Med. Chem. Lett.*, **2012**, *3*, 465.
- <sup>4</sup> Hiroya et al., *J. Org. Chem.*, **2004**, *69*, 1126-1136.
- <sup>5</sup> Higuchi, K.; Sato, Y.; Kojima, S.; Tsuchimochi, M.; Sugiura, K.; Hatori, M.; Kawasaki, T. *Tetrahedron* **2010**, *66*, 1236.
